# Supplementary material for: An Extensively Hydrolyzed Formula Supplemented with Two Human Milk Oligosaccharides Modifies the Fecal Microbiome and Metabolome in Infants with Cow’s Milk Protein Allergy
Source: Int J Mol Sci. 2023 Jul 13;24(14):11422. doi: 10.3390/ijms241411422 (PMC10379726; doi:10.3390/ijms241411422)
Supplement: Supplementary file 1 [file ijms-24-11422-s001.zip › supplementary Tables_12.07.xlsx]

## Sheet: Supplementary Table S1
Cohort	Visit	Cliff's delta	Lower CI	Upper CI	P	N Control	N Test	median_Control	median_Test	mean_Control	mean_Test
EE	Baseline	-0.180288	-0.447584	0.11658	0.246175	26	32	19.8169	17.6483	20.456	18.6831
EE	V1	-0.0300926	-0.3241	0.269216	0.850311	27	32	22.4732	22.8416	23.2122	22.998
EE	V3	-0.495758	-0.709192	-0.19908	0.00106562	25	33	31.4152	25.9886	31.3075	25.1052
EE	V6	-0.24359	-0.502032	0.0547912	0.143683	24	26	42.6962	38.8938	43.4889	39.4403
LE	Baseline	0.0634755	-0.210677	0.328372	0.67489	31	31	21.995	22.7356	22.9098	23.3353
LE	V1	-0.229839	-0.482704	0.0583988	0.119173	31	32	28.025	25.5719	28.1944	25.8285
LE	V3	0.0151515	-0.268753	0.296634	0.922149	32	33	32.436	33.5246	32.3561	32.6258
LE	V6	-0.318519	-0.551035	-0.0401065	0.0265165	36	30	42.2256	36.7599	42.919	36.648
All ages	Baseline	-0.0637705	-0.262264	0.139901	0.547359	57	63	21.0696	20.633	21.7905	20.9723
All ages	V1	-0.14278	-0.340586	0.0671288	0.174285	58	64	26.1179	23.744	25.8751	24.4133
All ages	V3	-0.231792	-0.41864	-0.0261165	0.0270118	57	66	31.4152	29.0658	31.8962	28.8655
All ages	V6	-0.281548	-0.46648	-0.0730316	0.00896727	60	56	42.254	37.8713	43.1469	37.9444

## Sheet: Supplementary Table S2
Cohort	Visit	N Control	N Test	Cliff's delta	Lower CI	Upper CI	P
All ages	Baseline	57	63	0.0281259	-0.147271	0.201808	0.75262
All ages	V1	58	64	-0.0525323	-0.236439	0.135008	0.581796
All ages	V3	57	66	-0.136895	-0.326461	0.0632568	0.174436
All ages	V6	60	56	-0.249702	-0.429415	-0.050967	0.0138589
EE	Baseline	26	32	0.0480769	-0.172863	0.264411	0.754428
EE	V1	27	32	-0.0578704	-0.317874	0.210229	0.717918
EE	V3	25	33	-0.318788	-0.564103	-0.0217601	0.0291726
EE	V6	24	26	-0.134615	-0.418028	0.172677	0.411508
LE	Baseline	31	31	0.0457856	-0.211773	0.297397	0.791177
LE	V1	31	32	-0.0292339	-0.282639	0.227985	0.814119
LE	V3	32	33	0.0236742	-0.2463	0.290239	0.889926
LE	V6	36	30	-0.35	-0.571153	-0.0814747	0.00989546

## Sheet: Supplementary Table S3
Cohort	Event time	Cluster (or higher)	HR	Lower CI	Upper CI	P Score (logrank) test	N Control	N Test
Early enrollment	first	FCT2	0.829685	0.491456	1.40069	0.484067	27	33
Early enrollment	first	FCT3	0.558188	0.324479	0.960229	0.0327346	27	33
Early enrollment	first	FCT4	0.738972	0.392449	1.39147	0.347087	27	33
Early enrollment	first	FCT5	0.539492	0.226915	1.28264	0.156011	27	33
Late enrollment	first	FCT2	1.2077	0.738088	1.97612	0.451897	32	33
Late enrollment	first	FCT3	0.94611	0.561924	1.59296	0.834895	32	33
Late enrollment	first	FCT4	0.918831	0.519549	1.62497	0.770979	32	33
Late enrollment	first	FCT5	0.592644	0.259045	1.35586	0.210192	32	33
All ages	first	FCT2	0.930068	0.651353	1.32804	0.689897	59	66
All ages	first	FCT3	0.737708	0.507885	1.07153	0.108873	59	66
All ages	first	FCT4	0.848073	0.556156	1.29321	0.443464	59	66
All ages	first	FCT5	0.622484	0.342513	1.1313	0.116493	59	66

## Sheet: Supplementary Table S4
Cohort	Visit	Taxonomic level	Taxa	MGS in set	MGS not in set	Cliffs delta	P	FDR
All ages	V0	genus	Klebsiella	6	134	0.763682	0.0015853	0.0221942
All ages	V0	genus	Veillonella	8	132	-0.538826	0.0106469	0.0745285
All ages	V0	genus	Enterobacter	6	134	0.570896	0.0182144	0.0850003
All ages	V0	genus	Bifidobacterium	9	131	0.445293	0.0257299	0.0900547
All ages	V0	genus	Rothia	4	136	-0.470588	0.109374	0.306248
All ages	V0	genus	Escherichia	3	137	-0.454988	0.178473	0.328753
All ages	V0	genus	Citrobacter	6	134	-0.318408	0.187859	0.328753
All ages	V0	genus	Bacteroides	9	131	0.280746	0.159686	0.328753
All ages	V0	genus	Lactobacillus	4	136	-0.297794	0.310993	0.421165
All ages	V0	genus	Clostridium	6	134	-0.236318	0.328363	0.421165
All ages	V0	genus	Enterococcus	6	134	0.235075	0.330915	0.421165
All ages	V0	genus	Blautia	3	137	0.270073	0.424494	0.495243
All ages	V0	genus	Lachnoclostridium	7	133	0.0440387	0.844608	0.909578
All ages	V0	genus	Streptococcus	10	130	-0.0138462	0.941949	0.941949
All ages	V0	genus	Fusicatenibacter	1	139	#N/A	#N/A	#N/A
All ages	V0	genus	Parabacteroides	2	138	#N/A	#N/A	#N/A
All ages	V0	genus	Alistipes	0	140	#N/A	#N/A	#N/A
All ages	V0	genus	Faecalibacterium	0	140	#N/A	#N/A	#N/A
All ages	V0	genus	Anaerostipes	1	139	#N/A	#N/A	#N/A
All ages	V0	genus	Roseburia	1	139	#N/A	#N/A	#N/A
All ages	V0	genus	Eubacterium	0	140	#N/A	#N/A	#N/A
All ages	V0	genus	Ruminococcus	0	140	#N/A	#N/A	#N/A
All ages	V0	genus	Subdoligranulum	0	140	#N/A	#N/A	#N/A
All ages	V0	genus	Collinsella	2	138	#N/A	#N/A	#N/A
All ages	V0	genus	Dorea	0	140	#N/A	#N/A	#N/A
All ages	V0	genus	Barnesiella	0	140	#N/A	#N/A	#N/A
All ages	V0	genus	Anaerobutyricum	0	140	#N/A	#N/A	#N/A
All ages	V0	genus	Gemmiger	0	140	#N/A	#N/A	#N/A
All ages	V0	genus	Odoribacter	0	140	#N/A	#N/A	#N/A
All ages	V0	genus	Coprococcus	2	138	#N/A	#N/A	#N/A
All ages	V0	genus	Lachnospira	0	140	#N/A	#N/A	#N/A
All ages	V0	genus	Akkermansia	1	139	#N/A	#N/A	#N/A
All ages	V0	genus	Prevotella	0	140	#N/A	#N/A	#N/A
All ages	V0	genus	Agathobaculum	0	140	#N/A	#N/A	#N/A
All ages	V0	genus	Sutterella	0	140	#N/A	#N/A	#N/A
All ages	V0	genus	Phascolarctobacterium	0	140	#N/A	#N/A	#N/A
All ages	V0	genus	Flavonifractor	2	138	#N/A	#N/A	#N/A
All ages	V0	genus	Dialister	0	140	#N/A	#N/A	#N/A
All ages	V0	genus	Paraprevotella	0	140	#N/A	#N/A	#N/A
All ages	V0	genus	Bilophila	0	140	#N/A	#N/A	#N/A
All ages	V0	genus	Parasutterella	0	140	#N/A	#N/A	#N/A
All ages	V0	genus	Methanobrevibacter	0	140	#N/A	#N/A	#N/A
All ages	V0	genus	Ruthenibacterium	1	139	#N/A	#N/A	#N/A
All ages	V0	genus	Haemophilus	2	138	#N/A	#N/A	#N/A
All ages	V0	genus	Adlercreutzia	0	140	#N/A	#N/A	#N/A
All ages	V0	genus	Butyricicoccus	0	140	#N/A	#N/A	#N/A
All ages	V0	genus	Butyrivibrio	0	140	#N/A	#N/A	#N/A
All ages	V0	genus	Catenibacterium	0	140	#N/A	#N/A	#N/A
All ages	V0	genus	Butyricimonas	0	140	#N/A	#N/A	#N/A
All ages	V0	genus	Intestinibacter	1	139	#N/A	#N/A	#N/A
All ages	V0	genus	Erysipelatoclostridium	2	138	#N/A	#N/A	#N/A
All ages	V0	genus	Tidjanibacter	0	140	#N/A	#N/A	#N/A
All ages	V0	genus	Eggerthella	1	139	#N/A	#N/A	#N/A
All ages	V0	genus	Coprobacter	0	140	#N/A	#N/A	#N/A
All ages	V0	genus	Romboutsia	1	139	#N/A	#N/A	#N/A
All ages	V0	genus	Holdemanella	0	140	#N/A	#N/A	#N/A
All ages	V0	genus	Duodenibacillus	0	140	#N/A	#N/A	#N/A
All ages	V0	genus	Megamonas	0	140	#N/A	#N/A	#N/A
All ages	V0	genus	Desulfovibrio	0	140	#N/A	#N/A	#N/A
All ages	V0	genus	Acidaminococcus	0	140	#N/A	#N/A	#N/A
All ages	V0	genus	Oscillibacter	0	140	#N/A	#N/A	#N/A
All ages	V0	genus	Sellimonas	1	139	#N/A	#N/A	#N/A
All ages	V0	genus	Monoglobus	0	140	#N/A	#N/A	#N/A
All ages	V0	genus	Candidatus Borkfalkia	0	140	#N/A	#N/A	#N/A
All ages	V0	genus	Mesosutterella	0	140	#N/A	#N/A	#N/A
All ages	V0	genus	Intestinimonas	0	140	#N/A	#N/A	#N/A
All ages	V0	genus	Coprobacillus	1	139	#N/A	#N/A	#N/A
All ages	V0	genus	Ellagibacter	0	140	#N/A	#N/A	#N/A
All ages	V0	genus	Hungatella	1	139	#N/A	#N/A	#N/A
All ages	V0	genus	Prevotellamassilia	0	140	#N/A	#N/A	#N/A
All ages	V0	genus	Eisenbergiella	0	140	#N/A	#N/A	#N/A
All ages	V0	genus	Mitsuokella	0	140	#N/A	#N/A	#N/A
All ages	V0	genus	Methanosphaera	0	140	#N/A	#N/A	#N/A
All ages	V0	genus	Victivallis	0	140	#N/A	#N/A	#N/A
All ages	V0	genus	Olsenella	0	140	#N/A	#N/A	#N/A
All ages	V0	genus	Neglecta	0	140	#N/A	#N/A	#N/A
All ages	V0	genus	Negativibacillus	0	140	#N/A	#N/A	#N/A
All ages	V0	genus	Megasphaera	1	139	#N/A	#N/A	#N/A
All ages	V0	genus	Allisonella	0	140	#N/A	#N/A	#N/A
All ages	V0	genus	Parolsenella	0	140	#N/A	#N/A	#N/A
All ages	V0	genus	Holdemania	0	140	#N/A	#N/A	#N/A
All ages	V0	genus	Pseudoflavonifractor	0	140	#N/A	#N/A	#N/A
All ages	V0	genus	Anaeromassilibacillus	0	140	#N/A	#N/A	#N/A
All ages	V0	genus	Merdimonas	0	140	#N/A	#N/A	#N/A
All ages	V0	genus	Oxalobacter	0	140	#N/A	#N/A	#N/A
All ages	V0	genus	Senegalimassilia	0	140	#N/A	#N/A	#N/A
All ages	V0	genus	Enorma	0	140	#N/A	#N/A	#N/A
All ages	V0	genus	Frisingicoccus	0	140	#N/A	#N/A	#N/A
All ages	V0	genus	Massilimicrobiota	0	140	#N/A	#N/A	#N/A
All ages	V0	genus	Anaerotignum	0	140	#N/A	#N/A	#N/A
All ages	V0	genus	Dakarella	0	140	#N/A	#N/A	#N/A
All ages	V0	genus	Anaerotruncus	0	140	#N/A	#N/A	#N/A
All ages	V0	genus	Turicibacter	0	140	#N/A	#N/A	#N/A
All ages	V0	genus	Blastocystis	0	140	#N/A	#N/A	#N/A
All ages	V0	genus	Mordavella	0	140	#N/A	#N/A	#N/A
All ages	V0	genus	Phocea	0	140	#N/A	#N/A	#N/A
All ages	V0	genus	Methanomassiliicoccus	0	140	#N/A	#N/A	#N/A
All ages	V0	genus	Clostridioides	1	139	#N/A	#N/A	#N/A
All ages	V0	genus	Fusobacterium	0	140	#N/A	#N/A	#N/A
All ages	V0	genus	Raoultella	2	138	#N/A	#N/A	#N/A
All ages	V0	genus	Faecalitalea	0	140	#N/A	#N/A	#N/A
All ages	V0	genus	Mediterranea	0	140	#N/A	#N/A	#N/A
All ages	V0	genus	Emergencia	0	140	#N/A	#N/A	#N/A
All ages	V0	genus	Hafnia	0	140	#N/A	#N/A	#N/A
All ages	V0	genus	Lactococcus	1	139	#N/A	#N/A	#N/A
All ages	V0	genus	Staphylococcus	2	138	#N/A	#N/A	#N/A
All ages	V0	genus	Muribaculum	0	140	#N/A	#N/A	#N/A
All ages	V0	genus	Faecalicatena	0	140	#N/A	#N/A	#N/A
All ages	V0	genus	Brachyspira	0	140	#N/A	#N/A	#N/A
All ages	V0	genus	Porphyromonas	0	140	#N/A	#N/A	#N/A
All ages	V0	genus	Culturomica	0	140	#N/A	#N/A	#N/A
All ages	V0	genus	Acidovorax	0	140	#N/A	#N/A	#N/A
All ages	V0	genus	Comamonas	0	140	#N/A	#N/A	#N/A
All ages	V0	genus	Acinetobacter	2	138	#N/A	#N/A	#N/A
All ages	V0	genus	Actinomyces	0	140	#N/A	#N/A	#N/A
All ages	V0	genus	Aeromonas	0	140	#N/A	#N/A	#N/A
All ages	V0	genus	Fenollaria	0	140	#N/A	#N/A	#N/A
All ages	V0	genus	Arcobacter	0	140	#N/A	#N/A	#N/A
All ages	V0	genus	Methylobacterium	0	140	#N/A	#N/A	#N/A
All ages	V0	genus	Atopobium	1	139	#N/A	#N/A	#N/A
All ages	V0	genus	Turicimonas	0	140	#N/A	#N/A	#N/A
All ages	V0	genus	Caulobacter	0	140	#N/A	#N/A	#N/A
All ages	V0	genus	Chryseobacterium	0	140	#N/A	#N/A	#N/A
All ages	V0	genus	Cloacibacillus	0	140	#N/A	#N/A	#N/A
All ages	V0	genus	Rubneribacter	0	140	#N/A	#N/A	#N/A
All ages	V0	genus	Corynebacterium	0	140	#N/A	#N/A	#N/A
All ages	V0	genus	Cutibacterium	2	138	#N/A	#N/A	#N/A
All ages	V0	genus	Metakosakonia	1	139	#N/A	#N/A	#N/A
All ages	V0	genus	Flavobacterium	0	140	#N/A	#N/A	#N/A
All ages	V0	genus	Sanguibacteroides	0	140	#N/A	#N/A	#N/A
All ages	V0	genus	Gardnerella	0	140	#N/A	#N/A	#N/A
All ages	V0	genus	Granulicatella	0	140	#N/A	#N/A	#N/A
All ages	V0	genus	Kosakonia	0	140	#N/A	#N/A	#N/A
All ages	V0	genus	Lysinibacillus	0	140	#N/A	#N/A	#N/A
All ages	V0	genus	Morganella	0	140	#N/A	#N/A	#N/A
All ages	V0	genus	Mycobacteroides	0	140	#N/A	#N/A	#N/A
All ages	V0	genus	Neisseria	1	139	#N/A	#N/A	#N/A
All ages	V0	genus	Pantoea	0	140	#N/A	#N/A	#N/A
All ages	V0	genus	Pseudomonas	0	140	#N/A	#N/A	#N/A
All ages	V0	genus	Robinsoniella	0	140	#N/A	#N/A	#N/A
All ages	V0	genus	Selenomonas	0	140	#N/A	#N/A	#N/A
All ages	V0	genus	Serratia	0	140	#N/A	#N/A	#N/A
All ages	V0	genus	Shewanella	0	140	#N/A	#N/A	#N/A
All ages	V0	genus	Sphingomonas	0	140	#N/A	#N/A	#N/A
All ages	V0	genus	Stenotrophomonas	1	139	#N/A	#N/A	#N/A
All ages	V0	genus	Kluyvera	0	140	#N/A	#N/A	#N/A
All ages	V0	genus	Atlantibacter	0	140	#N/A	#N/A	#N/A
All ages	V0	genus	Terrisporobacter	1	139	#N/A	#N/A	#N/A
All ages	V0	genus	Macrococcus	0	140	#N/A	#N/A	#N/A
All ages	V0	genus	Anaerosporobacter	0	140	#N/A	#N/A	#N/A
All ages	V0	genus	Schaalia	1	139	#N/A	#N/A	#N/A
All ages	V0	genus	Isoptericola	1	139	#N/A	#N/A	#N/A
All ages	V0	family	Veillonellaceae	9	131	-0.417303	0.036611	0.237971
All ages	V0	family	Bifidobacteriaceae	9	131	0.445293	0.0257299	0.237971
All ages	V0	family	Micrococcaceae	4	136	-0.470588	0.109374	0.359205
All ages	V0	family	Erysipelotrichaceae	3	137	-0.416058	0.218566	0.359205
All ages	V0	family	Peptostreptococcaceae	5	135	-0.34963	0.185173	0.359205
All ages	V0	family	Lachnospiraceae	20	120	-0.17125	0.221049	0.359205
All ages	V0	family	Enterobacteriaceae	26	114	0.181174	0.150218	0.359205
All ages	V0	family	Bacteroidaceae	9	131	0.280746	0.159686	0.359205
All ages	V0	family	Lactobacillaceae	4	136	-0.297794	0.310993	0.43019
All ages	V0	family	Enterococcaceae	6	134	0.235075	0.330915	0.43019
All ages	V0	family	Clostridiaceae	9	131	-0.0839695	0.674073	0.761533
All ages	V0	family	Ruminococcaceae	3	137	0.128954	0.702953	0.761533
All ages	V0	family	Streptococcaceae	11	129	-0.0232558	0.89832	0.89832
All ages	V0	family	Tannerellaceae	2	138	#N/A	#N/A	#N/A
All ages	V0	family	Rikenellaceae	0	140	#N/A	#N/A	#N/A
All ages	V0	family	Eubacteriaceae	0	140	#N/A	#N/A	#N/A
All ages	V0	family	Coriobacteriaceae	2	138	#N/A	#N/A	#N/A
All ages	V0	family	Barnesiellaceae	0	140	#N/A	#N/A	#N/A
All ages	V0	family	Odoribacteraceae	0	140	#N/A	#N/A	#N/A
All ages	V0	family	Oscillospiraceae	0	140	#N/A	#N/A	#N/A
All ages	V0	family	Akkermansiaceae	1	139	#N/A	#N/A	#N/A
All ages	V0	family	Prevotellaceae	0	140	#N/A	#N/A	#N/A
All ages	V0	family	Sutterellaceae	0	140	#N/A	#N/A	#N/A
All ages	V0	family	Acidaminococcaceae	0	140	#N/A	#N/A	#N/A
All ages	V0	family	Desulfovibrionaceae	0	140	#N/A	#N/A	#N/A
All ages	V0	family	Methanobacteriaceae	0	140	#N/A	#N/A	#N/A
All ages	V0	family	Pasteurellaceae	2	138	#N/A	#N/A	#N/A
All ages	V0	family	Eggerthellaceae	1	139	#N/A	#N/A	#N/A
All ages	V0	family	Selenomonadaceae	0	140	#N/A	#N/A	#N/A
All ages	V0	family	Candidatus Borkfalkiaceae	0	140	#N/A	#N/A	#N/A
All ages	V0	family	Clostridiales Family XIII. Incertae Sedis	0	140	#N/A	#N/A	#N/A
All ages	V0	family	Victivallaceae	0	140	#N/A	#N/A	#N/A
All ages	V0	family	Atopobiaceae	1	139	#N/A	#N/A	#N/A
All ages	V0	family	Oxalobacteraceae	0	140	#N/A	#N/A	#N/A
All ages	V0	family	Blastocystidae	0	140	#N/A	#N/A	#N/A
All ages	V0	family	Methanomassiliicoccaceae	0	140	#N/A	#N/A	#N/A
All ages	V0	family	Elusimicrobiaceae	0	140	#N/A	#N/A	#N/A
All ages	V0	family	Fusobacteriaceae	0	140	#N/A	#N/A	#N/A
All ages	V0	family	Hafniaceae	0	140	#N/A	#N/A	#N/A
All ages	V0	family	Staphylococcaceae	2	138	#N/A	#N/A	#N/A
All ages	V0	family	Muribaculaceae	0	140	#N/A	#N/A	#N/A
All ages	V0	family	Brachyspiraceae	0	140	#N/A	#N/A	#N/A
All ages	V0	family	Porphyromonadaceae	0	140	#N/A	#N/A	#N/A
All ages	V0	family	Actinomycetaceae	2	138	#N/A	#N/A	#N/A
All ages	V0	family	Spirochaetaceae	0	140	#N/A	#N/A	#N/A
All ages	V0	family	Comamonadaceae	0	140	#N/A	#N/A	#N/A
All ages	V0	family	Moraxellaceae	2	138	#N/A	#N/A	#N/A
All ages	V0	family	Aeromonadaceae	0	140	#N/A	#N/A	#N/A
All ages	V0	family	Campylobacteraceae	0	140	#N/A	#N/A	#N/A
All ages	V0	family	Methylobacteriaceae	0	140	#N/A	#N/A	#N/A
All ages	V0	family	Caulobacteraceae	0	140	#N/A	#N/A	#N/A
All ages	V0	family	Flavobacteriaceae	0	140	#N/A	#N/A	#N/A
All ages	V0	family	Synergistaceae	0	140	#N/A	#N/A	#N/A
All ages	V0	family	Corynebacteriaceae	0	140	#N/A	#N/A	#N/A
All ages	V0	family	Propionibacteriaceae	2	138	#N/A	#N/A	#N/A
All ages	V0	family	Carnobacteriaceae	0	140	#N/A	#N/A	#N/A
All ages	V0	family	Bacillaceae	0	140	#N/A	#N/A	#N/A
All ages	V0	family	Morganellaceae	0	140	#N/A	#N/A	#N/A
All ages	V0	family	Mycobacteriaceae	0	140	#N/A	#N/A	#N/A
All ages	V0	family	Neisseriaceae	1	139	#N/A	#N/A	#N/A
All ages	V0	family	Erwiniaceae	0	140	#N/A	#N/A	#N/A
All ages	V0	family	Pseudomonadaceae	0	140	#N/A	#N/A	#N/A
All ages	V0	family	Yersiniaceae	0	140	#N/A	#N/A	#N/A
All ages	V0	family	Shewanellaceae	0	140	#N/A	#N/A	#N/A
All ages	V0	family	Sphingomonadaceae	0	140	#N/A	#N/A	#N/A
All ages	V0	family	Xanthomonadaceae	1	139	#N/A	#N/A	#N/A
All ages	V0	family	Promicromonosporaceae	1	139	#N/A	#N/A	#N/A
All ages	V1	genus	Bifidobacterium	8	160	0.801562	0.000132963	0.00212741
All ages	V1	genus	Escherichia	3	165	-0.935354	0.0055594	0.0444752
All ages	V1	genus	Roseburia	3	165	-0.644444	0.0560887	0.261027
All ages	V1	genus	Klebsiella	5	163	0.484663	0.0652566	0.261027
All ages	V1	genus	Enterococcus	7	161	0.372671	0.095533	0.305706
All ages	V1	genus	Bacteroides	8	160	0.315625	0.132445	0.329475
All ages	V1	genus	Citrobacter	7	161	0.326531	0.144145	0.329475
All ages	V1	genus	Lachnoclostridium	9	159	0.245982	0.215055	0.382319
All ages	V1	genus	Enterobacter	7	161	0.279503	0.211234	0.382319
All ages	V1	genus	Veillonella	7	161	-0.173026	0.438978	0.582376
All ages	V1	genus	Streptococcus	10	158	-0.135443	0.473181	0.582376
All ages	V1	genus	Blautia	5	163	0.192638	0.463722	0.582376
All ages	V1	genus	Lactobacillus	3	165	0.276768	0.411971	0.582376
All ages	V1	genus	Raoultella	3	165	-0.0989899	0.769187	0.879071
All ages	V1	genus	Clostridium	11	157	-0.029531	0.870116	0.928124
All ages	V1	genus	Rothia	4	164	0.0182927	0.950225	0.950225
All ages	V1	genus	Fusicatenibacter	1	167	#N/A	#N/A	#N/A
All ages	V1	genus	Parabacteroides	2	166	#N/A	#N/A	#N/A
All ages	V1	genus	Alistipes	0	168	#N/A	#N/A	#N/A
All ages	V1	genus	Faecalibacterium	0	168	#N/A	#N/A	#N/A
All ages	V1	genus	Anaerostipes	2	166	#N/A	#N/A	#N/A
All ages	V1	genus	Eubacterium	0	168	#N/A	#N/A	#N/A
All ages	V1	genus	Ruminococcus	1	167	#N/A	#N/A	#N/A
All ages	V1	genus	Subdoligranulum	0	168	#N/A	#N/A	#N/A
All ages	V1	genus	Collinsella	2	166	#N/A	#N/A	#N/A
All ages	V1	genus	Dorea	0	168	#N/A	#N/A	#N/A
All ages	V1	genus	Barnesiella	0	168	#N/A	#N/A	#N/A
All ages	V1	genus	Anaerobutyricum	0	168	#N/A	#N/A	#N/A
All ages	V1	genus	Gemmiger	0	168	#N/A	#N/A	#N/A
All ages	V1	genus	Odoribacter	0	168	#N/A	#N/A	#N/A
All ages	V1	genus	Coprococcus	2	166	#N/A	#N/A	#N/A
All ages	V1	genus	Lachnospira	1	167	#N/A	#N/A	#N/A
All ages	V1	genus	Akkermansia	2	166	#N/A	#N/A	#N/A
All ages	V1	genus	Prevotella	0	168	#N/A	#N/A	#N/A
All ages	V1	genus	Agathobaculum	0	168	#N/A	#N/A	#N/A
All ages	V1	genus	Sutterella	1	167	#N/A	#N/A	#N/A
All ages	V1	genus	Phascolarctobacterium	0	168	#N/A	#N/A	#N/A
All ages	V1	genus	Flavonifractor	2	166	#N/A	#N/A	#N/A
All ages	V1	genus	Dialister	0	168	#N/A	#N/A	#N/A
All ages	V1	genus	Paraprevotella	0	168	#N/A	#N/A	#N/A
All ages	V1	genus	Bilophila	1	167	#N/A	#N/A	#N/A
All ages	V1	genus	Parasutterella	0	168	#N/A	#N/A	#N/A
All ages	V1	genus	Methanobrevibacter	0	168	#N/A	#N/A	#N/A
All ages	V1	genus	Ruthenibacterium	1	167	#N/A	#N/A	#N/A
All ages	V1	genus	Haemophilus	2	166	#N/A	#N/A	#N/A
All ages	V1	genus	Adlercreutzia	0	168	#N/A	#N/A	#N/A
All ages	V1	genus	Butyricicoccus	0	168	#N/A	#N/A	#N/A
All ages	V1	genus	Butyrivibrio	0	168	#N/A	#N/A	#N/A
All ages	V1	genus	Catenibacterium	0	168	#N/A	#N/A	#N/A
All ages	V1	genus	Butyricimonas	0	168	#N/A	#N/A	#N/A
All ages	V1	genus	Intestinibacter	1	167	#N/A	#N/A	#N/A
All ages	V1	genus	Erysipelatoclostridium	2	166	#N/A	#N/A	#N/A
All ages	V1	genus	Tidjanibacter	0	168	#N/A	#N/A	#N/A
All ages	V1	genus	Eggerthella	1	167	#N/A	#N/A	#N/A
All ages	V1	genus	Coprobacter	0	168	#N/A	#N/A	#N/A
All ages	V1	genus	Romboutsia	1	167	#N/A	#N/A	#N/A
All ages	V1	genus	Holdemanella	0	168	#N/A	#N/A	#N/A
All ages	V1	genus	Duodenibacillus	0	168	#N/A	#N/A	#N/A
All ages	V1	genus	Megamonas	0	168	#N/A	#N/A	#N/A
All ages	V1	genus	Desulfovibrio	0	168	#N/A	#N/A	#N/A
All ages	V1	genus	Acidaminococcus	0	168	#N/A	#N/A	#N/A
All ages	V1	genus	Oscillibacter	0	168	#N/A	#N/A	#N/A
All ages	V1	genus	Sellimonas	1	167	#N/A	#N/A	#N/A
All ages	V1	genus	Monoglobus	0	168	#N/A	#N/A	#N/A
All ages	V1	genus	Candidatus Borkfalkia	0	168	#N/A	#N/A	#N/A
All ages	V1	genus	Mesosutterella	0	168	#N/A	#N/A	#N/A
All ages	V1	genus	Intestinimonas	0	168	#N/A	#N/A	#N/A
All ages	V1	genus	Coprobacillus	1	167	#N/A	#N/A	#N/A
All ages	V1	genus	Ellagibacter	0	168	#N/A	#N/A	#N/A
All ages	V1	genus	Hungatella	2	166	#N/A	#N/A	#N/A
All ages	V1	genus	Prevotellamassilia	0	168	#N/A	#N/A	#N/A
All ages	V1	genus	Eisenbergiella	0	168	#N/A	#N/A	#N/A
All ages	V1	genus	Mitsuokella	0	168	#N/A	#N/A	#N/A
All ages	V1	genus	Methanosphaera	0	168	#N/A	#N/A	#N/A
All ages	V1	genus	Victivallis	0	168	#N/A	#N/A	#N/A
All ages	V1	genus	Olsenella	0	168	#N/A	#N/A	#N/A
All ages	V1	genus	Neglecta	0	168	#N/A	#N/A	#N/A
All ages	V1	genus	Negativibacillus	0	168	#N/A	#N/A	#N/A
All ages	V1	genus	Megasphaera	1	167	#N/A	#N/A	#N/A
All ages	V1	genus	Allisonella	0	168	#N/A	#N/A	#N/A
All ages	V1	genus	Parolsenella	0	168	#N/A	#N/A	#N/A
All ages	V1	genus	Holdemania	0	168	#N/A	#N/A	#N/A
All ages	V1	genus	Pseudoflavonifractor	0	168	#N/A	#N/A	#N/A
All ages	V1	genus	Anaeromassilibacillus	0	168	#N/A	#N/A	#N/A
All ages	V1	genus	Merdimonas	1	167	#N/A	#N/A	#N/A
All ages	V1	genus	Oxalobacter	0	168	#N/A	#N/A	#N/A
All ages	V1	genus	Senegalimassilia	0	168	#N/A	#N/A	#N/A
All ages	V1	genus	Enorma	0	168	#N/A	#N/A	#N/A
All ages	V1	genus	Frisingicoccus	0	168	#N/A	#N/A	#N/A
All ages	V1	genus	Massilimicrobiota	0	168	#N/A	#N/A	#N/A
All ages	V1	genus	Anaerotignum	0	168	#N/A	#N/A	#N/A
All ages	V1	genus	Dakarella	0	168	#N/A	#N/A	#N/A
All ages	V1	genus	Anaerotruncus	1	167	#N/A	#N/A	#N/A
All ages	V1	genus	Turicibacter	0	168	#N/A	#N/A	#N/A
All ages	V1	genus	Blastocystis	0	168	#N/A	#N/A	#N/A
All ages	V1	genus	Mordavella	0	168	#N/A	#N/A	#N/A
All ages	V1	genus	Phocea	0	168	#N/A	#N/A	#N/A
All ages	V1	genus	Methanomassiliicoccus	0	168	#N/A	#N/A	#N/A
All ages	V1	genus	Clostridioides	1	167	#N/A	#N/A	#N/A
All ages	V1	genus	Fusobacterium	0	168	#N/A	#N/A	#N/A
All ages	V1	genus	Faecalitalea	0	168	#N/A	#N/A	#N/A
All ages	V1	genus	Mediterranea	0	168	#N/A	#N/A	#N/A
All ages	V1	genus	Emergencia	0	168	#N/A	#N/A	#N/A
All ages	V1	genus	Hafnia	0	168	#N/A	#N/A	#N/A
All ages	V1	genus	Lactococcus	0	168	#N/A	#N/A	#N/A
All ages	V1	genus	Staphylococcus	2	166	#N/A	#N/A	#N/A
All ages	V1	genus	Muribaculum	0	168	#N/A	#N/A	#N/A
All ages	V1	genus	Faecalicatena	1	167	#N/A	#N/A	#N/A
All ages	V1	genus	Brachyspira	0	168	#N/A	#N/A	#N/A
All ages	V1	genus	Porphyromonas	0	168	#N/A	#N/A	#N/A
All ages	V1	genus	Culturomica	0	168	#N/A	#N/A	#N/A
All ages	V1	genus	Acidovorax	0	168	#N/A	#N/A	#N/A
All ages	V1	genus	Comamonas	0	168	#N/A	#N/A	#N/A
All ages	V1	genus	Acinetobacter	2	166	#N/A	#N/A	#N/A
All ages	V1	genus	Actinomyces	0	168	#N/A	#N/A	#N/A
All ages	V1	genus	Aeromonas	0	168	#N/A	#N/A	#N/A
All ages	V1	genus	Fenollaria	0	168	#N/A	#N/A	#N/A
All ages	V1	genus	Arcobacter	0	168	#N/A	#N/A	#N/A
All ages	V1	genus	Methylobacterium	0	168	#N/A	#N/A	#N/A
All ages	V1	genus	Atopobium	1	167	#N/A	#N/A	#N/A
All ages	V1	genus	Turicimonas	0	168	#N/A	#N/A	#N/A
All ages	V1	genus	Caulobacter	0	168	#N/A	#N/A	#N/A
All ages	V1	genus	Chryseobacterium	0	168	#N/A	#N/A	#N/A
All ages	V1	genus	Cloacibacillus	0	168	#N/A	#N/A	#N/A
All ages	V1	genus	Rubneribacter	0	168	#N/A	#N/A	#N/A
All ages	V1	genus	Corynebacterium	1	167	#N/A	#N/A	#N/A
All ages	V1	genus	Cutibacterium	1	167	#N/A	#N/A	#N/A
All ages	V1	genus	Metakosakonia	1	167	#N/A	#N/A	#N/A
All ages	V1	genus	Flavobacterium	0	168	#N/A	#N/A	#N/A
All ages	V1	genus	Sanguibacteroides	0	168	#N/A	#N/A	#N/A
All ages	V1	genus	Gardnerella	0	168	#N/A	#N/A	#N/A
All ages	V1	genus	Granulicatella	0	168	#N/A	#N/A	#N/A
All ages	V1	genus	Kosakonia	0	168	#N/A	#N/A	#N/A
All ages	V1	genus	Lysinibacillus	0	168	#N/A	#N/A	#N/A
All ages	V1	genus	Morganella	1	167	#N/A	#N/A	#N/A
All ages	V1	genus	Mycobacteroides	0	168	#N/A	#N/A	#N/A
All ages	V1	genus	Neisseria	1	167	#N/A	#N/A	#N/A
All ages	V1	genus	Pantoea	0	168	#N/A	#N/A	#N/A
All ages	V1	genus	Pseudomonas	0	168	#N/A	#N/A	#N/A
All ages	V1	genus	Robinsoniella	0	168	#N/A	#N/A	#N/A
All ages	V1	genus	Selenomonas	0	168	#N/A	#N/A	#N/A
All ages	V1	genus	Serratia	0	168	#N/A	#N/A	#N/A
All ages	V1	genus	Shewanella	0	168	#N/A	#N/A	#N/A
All ages	V1	genus	Sphingomonas	0	168	#N/A	#N/A	#N/A
All ages	V1	genus	Stenotrophomonas	1	167	#N/A	#N/A	#N/A
All ages	V1	genus	Kluyvera	0	168	#N/A	#N/A	#N/A
All ages	V1	genus	Atlantibacter	0	168	#N/A	#N/A	#N/A
All ages	V1	genus	Terrisporobacter	1	167	#N/A	#N/A	#N/A
All ages	V1	genus	Macrococcus	1	167	#N/A	#N/A	#N/A
All ages	V1	genus	Anaerosporobacter	0	168	#N/A	#N/A	#N/A
All ages	V1	genus	Schaalia	1	167	#N/A	#N/A	#N/A
All ages	V1	genus	Isoptericola	1	167	#N/A	#N/A	#N/A
All ages	V1	family	Bifidobacteriaceae	8	160	0.801562	0.000132963	0.00186148
All ages	V1	family	Erysipelotrichaceae	3	165	-0.648485	0.0545652	0.254637
All ages	V1	family	Peptostreptococcaceae	7	161	-0.432121	0.0532587	0.254637
All ages	V1	family	Enterococcaceae	7	161	0.372671	0.095533	0.334366
All ages	V1	family	Bacteroidaceae	8	160	0.315625	0.132445	0.370847
All ages	V1	family	Staphylococcaceae	3	165	-0.367677	0.275751	0.572462
All ages	V1	family	Lachnospiraceae	30	138	-0.124396	0.286231	0.572462
All ages	V1	family	Enterobacteriaceae	28	140	0.106378	0.374866	0.640843
All ages	V1	family	Lactobacillaceae	3	165	0.276768	0.411971	0.640843
All ages	V1	family	Streptococcaceae	10	158	-0.135443	0.473181	0.662453
All ages	V1	family	Veillonellaceae	8	160	-0.1	0.633589	0.697807
All ages	V1	family	Clostridiaceae	16	152	-0.0694901	0.647964	0.697807
All ages	V1	family	Ruminococcaceae	6	162	0.12037	0.61707	0.697807
All ages	V1	family	Micrococcaceae	4	164	0.0182927	0.950225	0.950225
All ages	V1	family	Tannerellaceae	2	166	#N/A	#N/A	#N/A
All ages	V1	family	Rikenellaceae	0	168	#N/A	#N/A	#N/A
All ages	V1	family	Eubacteriaceae	0	168	#N/A	#N/A	#N/A
All ages	V1	family	Coriobacteriaceae	2	166	#N/A	#N/A	#N/A
All ages	V1	family	Barnesiellaceae	0	168	#N/A	#N/A	#N/A
All ages	V1	family	Odoribacteraceae	0	168	#N/A	#N/A	#N/A
All ages	V1	family	Oscillospiraceae	1	167	#N/A	#N/A	#N/A
All ages	V1	family	Akkermansiaceae	2	166	#N/A	#N/A	#N/A
All ages	V1	family	Prevotellaceae	0	168	#N/A	#N/A	#N/A
All ages	V1	family	Sutterellaceae	1	167	#N/A	#N/A	#N/A
All ages	V1	family	Acidaminococcaceae	0	168	#N/A	#N/A	#N/A
All ages	V1	family	Desulfovibrionaceae	1	167	#N/A	#N/A	#N/A
All ages	V1	family	Methanobacteriaceae	0	168	#N/A	#N/A	#N/A
All ages	V1	family	Pasteurellaceae	2	166	#N/A	#N/A	#N/A
All ages	V1	family	Eggerthellaceae	1	167	#N/A	#N/A	#N/A
All ages	V1	family	Selenomonadaceae	0	168	#N/A	#N/A	#N/A
All ages	V1	family	Candidatus Borkfalkiaceae	0	168	#N/A	#N/A	#N/A
All ages	V1	family	Clostridiales Family XIII. Incertae Sedis	0	168	#N/A	#N/A	#N/A
All ages	V1	family	Victivallaceae	0	168	#N/A	#N/A	#N/A
All ages	V1	family	Atopobiaceae	1	167	#N/A	#N/A	#N/A
All ages	V1	family	Oxalobacteraceae	0	168	#N/A	#N/A	#N/A
All ages	V1	family	Blastocystidae	0	168	#N/A	#N/A	#N/A
All ages	V1	family	Methanomassiliicoccaceae	0	168	#N/A	#N/A	#N/A
All ages	V1	family	Elusimicrobiaceae	0	168	#N/A	#N/A	#N/A
All ages	V1	family	Fusobacteriaceae	0	168	#N/A	#N/A	#N/A
All ages	V1	family	Hafniaceae	0	168	#N/A	#N/A	#N/A
All ages	V1	family	Muribaculaceae	0	168	#N/A	#N/A	#N/A
All ages	V1	family	Brachyspiraceae	0	168	#N/A	#N/A	#N/A
All ages	V1	family	Porphyromonadaceae	0	168	#N/A	#N/A	#N/A
All ages	V1	family	Actinomycetaceae	2	166	#N/A	#N/A	#N/A
All ages	V1	family	Spirochaetaceae	0	168	#N/A	#N/A	#N/A
All ages	V1	family	Comamonadaceae	0	168	#N/A	#N/A	#N/A
All ages	V1	family	Moraxellaceae	2	166	#N/A	#N/A	#N/A
All ages	V1	family	Aeromonadaceae	0	168	#N/A	#N/A	#N/A
All ages	V1	family	Campylobacteraceae	0	168	#N/A	#N/A	#N/A
All ages	V1	family	Methylobacteriaceae	0	168	#N/A	#N/A	#N/A
All ages	V1	family	Caulobacteraceae	0	168	#N/A	#N/A	#N/A
All ages	V1	family	Flavobacteriaceae	0	168	#N/A	#N/A	#N/A
All ages	V1	family	Synergistaceae	0	168	#N/A	#N/A	#N/A
All ages	V1	family	Corynebacteriaceae	1	167	#N/A	#N/A	#N/A
All ages	V1	family	Propionibacteriaceae	1	167	#N/A	#N/A	#N/A
All ages	V1	family	Carnobacteriaceae	0	168	#N/A	#N/A	#N/A
All ages	V1	family	Bacillaceae	0	168	#N/A	#N/A	#N/A
All ages	V1	family	Morganellaceae	1	167	#N/A	#N/A	#N/A
All ages	V1	family	Mycobacteriaceae	0	168	#N/A	#N/A	#N/A
All ages	V1	family	Neisseriaceae	1	167	#N/A	#N/A	#N/A
All ages	V1	family	Erwiniaceae	0	168	#N/A	#N/A	#N/A
All ages	V1	family	Pseudomonadaceae	0	168	#N/A	#N/A	#N/A
All ages	V1	family	Yersiniaceae	0	168	#N/A	#N/A	#N/A
All ages	V1	family	Shewanellaceae	0	168	#N/A	#N/A	#N/A
All ages	V1	family	Sphingomonadaceae	0	168	#N/A	#N/A	#N/A
All ages	V1	family	Xanthomonadaceae	1	167	#N/A	#N/A	#N/A
All ages	V1	family	Promicromonosporaceae	1	167	#N/A	#N/A	#N/A
All ages	V3	genus	Enterobacter	7	193	0.671355	0.00257241	0.0463034
All ages	V3	genus	Klebsiella	5	195	0.641026	0.0144712	0.116113
All ages	V3	genus	Escherichia	4	196	0.683673	0.0193522	0.116113
All ages	V3	genus	Lachnoclostridium	10	190	-0.388421	0.0385987	0.173694
All ages	V3	genus	Enterococcus	6	194	0.453608	0.0586655	0.211196
All ages	V3	genus	Bifidobacterium	9	191	0.321699	0.10321	0.309631
All ages	V3	genus	Bacteroides	12	188	0.240248	0.163288	0.419884
All ages	V3	genus	Erysipelatoclostridium	3	197	-0.384095	0.253969	0.507937
All ages	V3	genus	Roseburia	4	196	-0.336735	0.249368	0.507937
All ages	V3	genus	Clostridium	11	189	-0.142376	0.42772	0.687364
All ages	V3	genus	Parabacteroides	4	196	0.216837	0.458242	0.687364
All ages	V3	genus	Citrobacter	4	196	0.25	0.392447	0.687364
All ages	V3	genus	Raoultella	3	197	-0.201354	0.549826	0.735208
All ages	V3	genus	Veillonella	8	192	0.09375	0.653518	0.735208
All ages	V3	genus	Blautia	6	194	0.11512	0.631345	0.735208
All ages	V3	genus	Rothia	4	196	0.137755	0.63748	0.735208
All ages	V3	genus	Streptococcus	10	190	-0.0210526	0.910736	0.955916
All ages	V3	genus	Anaerostipes	3	197	-0.0186125	0.955916	0.955916
All ages	V3	genus	Fusicatenibacter	1	199	#N/A	#N/A	#N/A
All ages	V3	genus	Alistipes	1	199	#N/A	#N/A	#N/A
All ages	V3	genus	Faecalibacterium	2	198	#N/A	#N/A	#N/A
All ages	V3	genus	Eubacterium	1	199	#N/A	#N/A	#N/A
All ages	V3	genus	Ruminococcus	1	199	#N/A	#N/A	#N/A
All ages	V3	genus	Subdoligranulum	0	200	#N/A	#N/A	#N/A
All ages	V3	genus	Collinsella	2	198	#N/A	#N/A	#N/A
All ages	V3	genus	Dorea	0	200	#N/A	#N/A	#N/A
All ages	V3	genus	Barnesiella	0	200	#N/A	#N/A	#N/A
All ages	V3	genus	Anaerobutyricum	0	200	#N/A	#N/A	#N/A
All ages	V3	genus	Gemmiger	0	200	#N/A	#N/A	#N/A
All ages	V3	genus	Odoribacter	0	200	#N/A	#N/A	#N/A
All ages	V3	genus	Coprococcus	2	198	#N/A	#N/A	#N/A
All ages	V3	genus	Lachnospira	1	199	#N/A	#N/A	#N/A
All ages	V3	genus	Akkermansia	2	198	#N/A	#N/A	#N/A
All ages	V3	genus	Prevotella	0	200	#N/A	#N/A	#N/A
All ages	V3	genus	Agathobaculum	1	199	#N/A	#N/A	#N/A
All ages	V3	genus	Sutterella	1	199	#N/A	#N/A	#N/A
All ages	V3	genus	Phascolarctobacterium	1	199	#N/A	#N/A	#N/A
All ages	V3	genus	Flavonifractor	2	198	#N/A	#N/A	#N/A
All ages	V3	genus	Dialister	0	200	#N/A	#N/A	#N/A
All ages	V3	genus	Paraprevotella	0	200	#N/A	#N/A	#N/A
All ages	V3	genus	Bilophila	1	199	#N/A	#N/A	#N/A
All ages	V3	genus	Parasutterella	2	198	#N/A	#N/A	#N/A
All ages	V3	genus	Methanobrevibacter	0	200	#N/A	#N/A	#N/A
All ages	V3	genus	Ruthenibacterium	1	199	#N/A	#N/A	#N/A
All ages	V3	genus	Haemophilus	2	198	#N/A	#N/A	#N/A
All ages	V3	genus	Adlercreutzia	0	200	#N/A	#N/A	#N/A
All ages	V3	genus	Butyricicoccus	0	200	#N/A	#N/A	#N/A
All ages	V3	genus	Butyrivibrio	0	200	#N/A	#N/A	#N/A
All ages	V3	genus	Catenibacterium	0	200	#N/A	#N/A	#N/A
All ages	V3	genus	Butyricimonas	0	200	#N/A	#N/A	#N/A
All ages	V3	genus	Intestinibacter	1	199	#N/A	#N/A	#N/A
All ages	V3	genus	Tidjanibacter	0	200	#N/A	#N/A	#N/A
All ages	V3	genus	Eggerthella	1	199	#N/A	#N/A	#N/A
All ages	V3	genus	Coprobacter	0	200	#N/A	#N/A	#N/A
All ages	V3	genus	Romboutsia	1	199	#N/A	#N/A	#N/A
All ages	V3	genus	Holdemanella	0	200	#N/A	#N/A	#N/A
All ages	V3	genus	Duodenibacillus	0	200	#N/A	#N/A	#N/A
All ages	V3	genus	Megamonas	0	200	#N/A	#N/A	#N/A
All ages	V3	genus	Desulfovibrio	0	200	#N/A	#N/A	#N/A
All ages	V3	genus	Acidaminococcus	0	200	#N/A	#N/A	#N/A
All ages	V3	genus	Oscillibacter	0	200	#N/A	#N/A	#N/A
All ages	V3	genus	Sellimonas	1	199	#N/A	#N/A	#N/A
All ages	V3	genus	Monoglobus	0	200	#N/A	#N/A	#N/A
All ages	V3	genus	Candidatus Borkfalkia	0	200	#N/A	#N/A	#N/A
All ages	V3	genus	Lactobacillus	1	199	#N/A	#N/A	#N/A
All ages	V3	genus	Mesosutterella	0	200	#N/A	#N/A	#N/A
All ages	V3	genus	Intestinimonas	0	200	#N/A	#N/A	#N/A
All ages	V3	genus	Coprobacillus	1	199	#N/A	#N/A	#N/A
All ages	V3	genus	Ellagibacter	0	200	#N/A	#N/A	#N/A
All ages	V3	genus	Hungatella	2	198	#N/A	#N/A	#N/A
All ages	V3	genus	Prevotellamassilia	0	200	#N/A	#N/A	#N/A
All ages	V3	genus	Eisenbergiella	0	200	#N/A	#N/A	#N/A
All ages	V3	genus	Mitsuokella	0	200	#N/A	#N/A	#N/A
All ages	V3	genus	Methanosphaera	0	200	#N/A	#N/A	#N/A
All ages	V3	genus	Victivallis	0	200	#N/A	#N/A	#N/A
All ages	V3	genus	Olsenella	0	200	#N/A	#N/A	#N/A
All ages	V3	genus	Neglecta	0	200	#N/A	#N/A	#N/A
All ages	V3	genus	Negativibacillus	0	200	#N/A	#N/A	#N/A
All ages	V3	genus	Megasphaera	1	199	#N/A	#N/A	#N/A
All ages	V3	genus	Allisonella	0	200	#N/A	#N/A	#N/A
All ages	V3	genus	Parolsenella	0	200	#N/A	#N/A	#N/A
All ages	V3	genus	Holdemania	0	200	#N/A	#N/A	#N/A
All ages	V3	genus	Pseudoflavonifractor	0	200	#N/A	#N/A	#N/A
All ages	V3	genus	Anaeromassilibacillus	0	200	#N/A	#N/A	#N/A
All ages	V3	genus	Merdimonas	1	199	#N/A	#N/A	#N/A
All ages	V3	genus	Oxalobacter	0	200	#N/A	#N/A	#N/A
All ages	V3	genus	Senegalimassilia	0	200	#N/A	#N/A	#N/A
All ages	V3	genus	Enorma	0	200	#N/A	#N/A	#N/A
All ages	V3	genus	Frisingicoccus	0	200	#N/A	#N/A	#N/A
All ages	V3	genus	Massilimicrobiota	0	200	#N/A	#N/A	#N/A
All ages	V3	genus	Anaerotignum	0	200	#N/A	#N/A	#N/A
All ages	V3	genus	Dakarella	0	200	#N/A	#N/A	#N/A
All ages	V3	genus	Anaerotruncus	1	199	#N/A	#N/A	#N/A
All ages	V3	genus	Turicibacter	2	198	#N/A	#N/A	#N/A
All ages	V3	genus	Blastocystis	0	200	#N/A	#N/A	#N/A
All ages	V3	genus	Mordavella	0	200	#N/A	#N/A	#N/A
All ages	V3	genus	Phocea	1	199	#N/A	#N/A	#N/A
All ages	V3	genus	Methanomassiliicoccus	0	200	#N/A	#N/A	#N/A
All ages	V3	genus	Clostridioides	1	199	#N/A	#N/A	#N/A
All ages	V3	genus	Fusobacterium	0	200	#N/A	#N/A	#N/A
All ages	V3	genus	Faecalitalea	0	200	#N/A	#N/A	#N/A
All ages	V3	genus	Mediterranea	0	200	#N/A	#N/A	#N/A
All ages	V3	genus	Emergencia	0	200	#N/A	#N/A	#N/A
All ages	V3	genus	Hafnia	0	200	#N/A	#N/A	#N/A
All ages	V3	genus	Lactococcus	2	198	#N/A	#N/A	#N/A
All ages	V3	genus	Staphylococcus	2	198	#N/A	#N/A	#N/A
All ages	V3	genus	Muribaculum	0	200	#N/A	#N/A	#N/A
All ages	V3	genus	Faecalicatena	1	199	#N/A	#N/A	#N/A
All ages	V3	genus	Brachyspira	0	200	#N/A	#N/A	#N/A
All ages	V3	genus	Porphyromonas	0	200	#N/A	#N/A	#N/A
All ages	V3	genus	Culturomica	0	200	#N/A	#N/A	#N/A
All ages	V3	genus	Acidovorax	0	200	#N/A	#N/A	#N/A
All ages	V3	genus	Comamonas	0	200	#N/A	#N/A	#N/A
All ages	V3	genus	Acinetobacter	1	199	#N/A	#N/A	#N/A
All ages	V3	genus	Actinomyces	0	200	#N/A	#N/A	#N/A
All ages	V3	genus	Aeromonas	0	200	#N/A	#N/A	#N/A
All ages	V3	genus	Fenollaria	0	200	#N/A	#N/A	#N/A
All ages	V3	genus	Arcobacter	0	200	#N/A	#N/A	#N/A
All ages	V3	genus	Methylobacterium	0	200	#N/A	#N/A	#N/A
All ages	V3	genus	Atopobium	1	199	#N/A	#N/A	#N/A
All ages	V3	genus	Turicimonas	0	200	#N/A	#N/A	#N/A
All ages	V3	genus	Caulobacter	0	200	#N/A	#N/A	#N/A
All ages	V3	genus	Chryseobacterium	0	200	#N/A	#N/A	#N/A
All ages	V3	genus	Cloacibacillus	0	200	#N/A	#N/A	#N/A
All ages	V3	genus	Rubneribacter	0	200	#N/A	#N/A	#N/A
All ages	V3	genus	Corynebacterium	1	199	#N/A	#N/A	#N/A
All ages	V3	genus	Cutibacterium	1	199	#N/A	#N/A	#N/A
All ages	V3	genus	Metakosakonia	1	199	#N/A	#N/A	#N/A
All ages	V3	genus	Flavobacterium	0	200	#N/A	#N/A	#N/A
All ages	V3	genus	Sanguibacteroides	0	200	#N/A	#N/A	#N/A
All ages	V3	genus	Gardnerella	0	200	#N/A	#N/A	#N/A
All ages	V3	genus	Granulicatella	0	200	#N/A	#N/A	#N/A
All ages	V3	genus	Kosakonia	0	200	#N/A	#N/A	#N/A
All ages	V3	genus	Lysinibacillus	0	200	#N/A	#N/A	#N/A
All ages	V3	genus	Morganella	1	199	#N/A	#N/A	#N/A
All ages	V3	genus	Mycobacteroides	0	200	#N/A	#N/A	#N/A
All ages	V3	genus	Neisseria	1	199	#N/A	#N/A	#N/A
All ages	V3	genus	Pantoea	0	200	#N/A	#N/A	#N/A
All ages	V3	genus	Pseudomonas	0	200	#N/A	#N/A	#N/A
All ages	V3	genus	Robinsoniella	0	200	#N/A	#N/A	#N/A
All ages	V3	genus	Selenomonas	0	200	#N/A	#N/A	#N/A
All ages	V3	genus	Serratia	0	200	#N/A	#N/A	#N/A
All ages	V3	genus	Shewanella	0	200	#N/A	#N/A	#N/A
All ages	V3	genus	Sphingomonas	0	200	#N/A	#N/A	#N/A
All ages	V3	genus	Stenotrophomonas	0	200	#N/A	#N/A	#N/A
All ages	V3	genus	Kluyvera	0	200	#N/A	#N/A	#N/A
All ages	V3	genus	Atlantibacter	0	200	#N/A	#N/A	#N/A
All ages	V3	genus	Terrisporobacter	1	199	#N/A	#N/A	#N/A
All ages	V3	genus	Macrococcus	1	199	#N/A	#N/A	#N/A
All ages	V3	genus	Anaerosporobacter	0	200	#N/A	#N/A	#N/A
All ages	V3	genus	Schaalia	1	199	#N/A	#N/A	#N/A
All ages	V3	genus	Isoptericola	1	199	#N/A	#N/A	#N/A
All ages	V3	family	Enterobacteriaceae	26	174	0.503095	3.56448e-05	0.000534672
All ages	V3	family	Peptostreptococcaceae	6	194	-0.636598	0.00796821	0.0597616
All ages	V3	family	Erysipelotrichaceae	7	193	-0.432272	0.0522459	0.219996
All ages	V3	family	Enterococcaceae	6	194	0.453608	0.0586655	0.219996
All ages	V3	family	Ruminococcaceae	12	188	-0.272606	0.113681	0.284202
All ages	V3	family	Bifidobacteriaceae	9	191	0.321699	0.10321	0.284202
All ages	V3	family	Lachnospiraceae	38	162	-0.147661	0.156953	0.306166
All ages	V3	family	Bacteroidaceae	12	188	0.240248	0.163288	0.306166
All ages	V3	family	Staphylococcaceae	3	197	-0.445008	0.186276	0.31046
All ages	V3	family	Veillonellaceae	9	191	0.142525	0.470341	0.641374
All ages	V3	family	Tannerellaceae	4	196	0.216837	0.458242	0.641374
All ages	V3	family	Sutterellaceae	3	197	-0.181049	0.590773	0.683014
All ages	V3	family	Clostridiaceae	20	180	-0.0652778	0.632296	0.683014
All ages	V3	family	Micrococcaceae	4	196	0.137755	0.63748	0.683014
All ages	V3	family	Streptococcaceae	12	188	-0.0416667	0.80895	0.80895
All ages	V3	family	Rikenellaceae	1	199	#N/A	#N/A	#N/A
All ages	V3	family	Eubacteriaceae	1	199	#N/A	#N/A	#N/A
All ages	V3	family	Coriobacteriaceae	2	198	#N/A	#N/A	#N/A
All ages	V3	family	Barnesiellaceae	0	200	#N/A	#N/A	#N/A
All ages	V3	family	Odoribacteraceae	0	200	#N/A	#N/A	#N/A
All ages	V3	family	Oscillospiraceae	1	199	#N/A	#N/A	#N/A
All ages	V3	family	Akkermansiaceae	2	198	#N/A	#N/A	#N/A
All ages	V3	family	Prevotellaceae	0	200	#N/A	#N/A	#N/A
All ages	V3	family	Acidaminococcaceae	1	199	#N/A	#N/A	#N/A
All ages	V3	family	Desulfovibrionaceae	1	199	#N/A	#N/A	#N/A
All ages	V3	family	Methanobacteriaceae	0	200	#N/A	#N/A	#N/A
All ages	V3	family	Pasteurellaceae	2	198	#N/A	#N/A	#N/A
All ages	V3	family	Eggerthellaceae	1	199	#N/A	#N/A	#N/A
All ages	V3	family	Selenomonadaceae	0	200	#N/A	#N/A	#N/A
All ages	V3	family	Candidatus Borkfalkiaceae	0	200	#N/A	#N/A	#N/A
All ages	V3	family	Lactobacillaceae	1	199	#N/A	#N/A	#N/A
All ages	V3	family	Clostridiales Family XIII. Incertae Sedis	0	200	#N/A	#N/A	#N/A
All ages	V3	family	Victivallaceae	0	200	#N/A	#N/A	#N/A
All ages	V3	family	Atopobiaceae	1	199	#N/A	#N/A	#N/A
All ages	V3	family	Oxalobacteraceae	0	200	#N/A	#N/A	#N/A
All ages	V3	family	Blastocystidae	0	200	#N/A	#N/A	#N/A
All ages	V3	family	Methanomassiliicoccaceae	0	200	#N/A	#N/A	#N/A
All ages	V3	family	Elusimicrobiaceae	0	200	#N/A	#N/A	#N/A
All ages	V3	family	Fusobacteriaceae	0	200	#N/A	#N/A	#N/A
All ages	V3	family	Hafniaceae	0	200	#N/A	#N/A	#N/A
All ages	V3	family	Muribaculaceae	0	200	#N/A	#N/A	#N/A
All ages	V3	family	Brachyspiraceae	0	200	#N/A	#N/A	#N/A
All ages	V3	family	Porphyromonadaceae	0	200	#N/A	#N/A	#N/A
All ages	V3	family	Actinomycetaceae	1	199	#N/A	#N/A	#N/A
All ages	V3	family	Spirochaetaceae	0	200	#N/A	#N/A	#N/A
All ages	V3	family	Comamonadaceae	0	200	#N/A	#N/A	#N/A
All ages	V3	family	Moraxellaceae	1	199	#N/A	#N/A	#N/A
All ages	V3	family	Aeromonadaceae	0	200	#N/A	#N/A	#N/A
All ages	V3	family	Campylobacteraceae	0	200	#N/A	#N/A	#N/A
All ages	V3	family	Methylobacteriaceae	0	200	#N/A	#N/A	#N/A
All ages	V3	family	Caulobacteraceae	0	200	#N/A	#N/A	#N/A
All ages	V3	family	Flavobacteriaceae	0	200	#N/A	#N/A	#N/A
All ages	V3	family	Synergistaceae	0	200	#N/A	#N/A	#N/A
All ages	V3	family	Corynebacteriaceae	1	199	#N/A	#N/A	#N/A
All ages	V3	family	Propionibacteriaceae	1	199	#N/A	#N/A	#N/A
All ages	V3	family	Carnobacteriaceae	0	200	#N/A	#N/A	#N/A
All ages	V3	family	Bacillaceae	0	200	#N/A	#N/A	#N/A
All ages	V3	family	Morganellaceae	1	199	#N/A	#N/A	#N/A
All ages	V3	family	Mycobacteriaceae	0	200	#N/A	#N/A	#N/A
All ages	V3	family	Neisseriaceae	1	199	#N/A	#N/A	#N/A
All ages	V3	family	Erwiniaceae	0	200	#N/A	#N/A	#N/A
All ages	V3	family	Pseudomonadaceae	0	200	#N/A	#N/A	#N/A
All ages	V3	family	Yersiniaceae	0	200	#N/A	#N/A	#N/A
All ages	V3	family	Shewanellaceae	0	200	#N/A	#N/A	#N/A
All ages	V3	family	Sphingomonadaceae	0	200	#N/A	#N/A	#N/A
All ages	V3	family	Xanthomonadaceae	0	200	#N/A	#N/A	#N/A
All ages	V3	family	Promicromonosporaceae	1	199	#N/A	#N/A	#N/A
All ages	V6	genus	Roseburia	4	272	-0.941176	0.00123452	0.0296284
All ages	V6	genus	Enterococcus	6	270	0.658025	0.00584645	0.0467716
All ages	V6	genus	Citrobacter	4	272	0.817096	0.005034	0.0467716
All ages	V6	genus	Lachnoclostridium	10	266	0.47218	0.0112648	0.0675886
All ages	V6	genus	Faecalibacterium	7	269	-0.494424	0.0255632	0.122703
All ages	V6	genus	Bacteroides	16	260	0.31274	0.0357997	0.122742
All ages	V6	genus	Escherichia	3	273	0.714286	0.0333921	0.122742
All ages	V6	genus	Alistipes	4	272	-0.576287	0.0479035	0.14371
All ages	V6	genus	Ruminococcus	5	271	-0.387454	0.137738	0.336004
All ages	V6	genus	Klebsiella	5	271	0.38524	0.140002	0.336004
All ages	V6	genus	Eisenbergiella	3	273	-0.450549	0.179642	0.391946
All ages	V6	genus	Blautia	9	267	0.239284	0.222195	0.44439
All ages	V6	genus	Veillonella	7	269	0.251195	0.256636	0.473789
All ages	V6	genus	Dorea	4	272	-0.285846	0.326482	0.522372
All ages	V6	genus	Erysipelatoclostridium	3	273	0.338217	0.313789	0.522372
All ages	V6	genus	Parabacteroides	4	272	0.248162	0.394288	0.591432
All ages	V6	genus	Rothia	4	272	-0.205882	0.479732	0.677269
All ages	V6	genus	Coprococcus	3	273	-0.188034	0.575468	0.767291
All ages	V6	genus	Bifidobacterium	9	267	-0.0819809	0.675781	0.832885
All ages	V6	genus	Clostridium	13	263	0.0646388	0.69407	0.832885
All ages	V6	genus	Anaerostipes	3	273	0.0818071	0.807507	0.922865
All ages	V6	genus	Eubacterium	4	272	-0.03125	0.914573	0.967479
All ages	V6	genus	Enterobacter	7	269	0.00902815	0.967479	0.967479
All ages	V6	genus	Streptococcus	11	265	0.012693	0.943144	0.967479
All ages	V6	genus	Fusicatenibacter	1	275	#N/A	#N/A	#N/A
All ages	V6	genus	Subdoligranulum	0	276	#N/A	#N/A	#N/A
All ages	V6	genus	Collinsella	2	274	#N/A	#N/A	#N/A
All ages	V6	genus	Barnesiella	1	275	#N/A	#N/A	#N/A
All ages	V6	genus	Anaerobutyricum	1	275	#N/A	#N/A	#N/A
All ages	V6	genus	Gemmiger	1	275	#N/A	#N/A	#N/A
All ages	V6	genus	Odoribacter	1	275	#N/A	#N/A	#N/A
All ages	V6	genus	Lachnospira	1	275	#N/A	#N/A	#N/A
All ages	V6	genus	Akkermansia	2	274	#N/A	#N/A	#N/A
All ages	V6	genus	Prevotella	1	275	#N/A	#N/A	#N/A
All ages	V6	genus	Agathobaculum	1	275	#N/A	#N/A	#N/A
All ages	V6	genus	Sutterella	2	274	#N/A	#N/A	#N/A
All ages	V6	genus	Phascolarctobacterium	1	275	#N/A	#N/A	#N/A
All ages	V6	genus	Flavonifractor	2	274	#N/A	#N/A	#N/A
All ages	V6	genus	Dialister	1	275	#N/A	#N/A	#N/A
All ages	V6	genus	Paraprevotella	0	276	#N/A	#N/A	#N/A
All ages	V6	genus	Bilophila	1	275	#N/A	#N/A	#N/A
All ages	V6	genus	Parasutterella	2	274	#N/A	#N/A	#N/A
All ages	V6	genus	Methanobrevibacter	0	276	#N/A	#N/A	#N/A
All ages	V6	genus	Ruthenibacterium	1	275	#N/A	#N/A	#N/A
All ages	V6	genus	Haemophilus	2	274	#N/A	#N/A	#N/A
All ages	V6	genus	Adlercreutzia	1	275	#N/A	#N/A	#N/A
All ages	V6	genus	Butyricicoccus	1	275	#N/A	#N/A	#N/A
All ages	V6	genus	Butyrivibrio	0	276	#N/A	#N/A	#N/A
All ages	V6	genus	Catenibacterium	0	276	#N/A	#N/A	#N/A
All ages	V6	genus	Butyricimonas	0	276	#N/A	#N/A	#N/A
All ages	V6	genus	Intestinibacter	1	275	#N/A	#N/A	#N/A
All ages	V6	genus	Tidjanibacter	0	276	#N/A	#N/A	#N/A
All ages	V6	genus	Eggerthella	1	275	#N/A	#N/A	#N/A
All ages	V6	genus	Coprobacter	0	276	#N/A	#N/A	#N/A
All ages	V6	genus	Romboutsia	1	275	#N/A	#N/A	#N/A
All ages	V6	genus	Holdemanella	0	276	#N/A	#N/A	#N/A
All ages	V6	genus	Duodenibacillus	0	276	#N/A	#N/A	#N/A
All ages	V6	genus	Megamonas	0	276	#N/A	#N/A	#N/A
All ages	V6	genus	Desulfovibrio	0	276	#N/A	#N/A	#N/A
All ages	V6	genus	Acidaminococcus	0	276	#N/A	#N/A	#N/A
All ages	V6	genus	Oscillibacter	0	276	#N/A	#N/A	#N/A
All ages	V6	genus	Sellimonas	1	275	#N/A	#N/A	#N/A
All ages	V6	genus	Monoglobus	0	276	#N/A	#N/A	#N/A
All ages	V6	genus	Candidatus Borkfalkia	0	276	#N/A	#N/A	#N/A
All ages	V6	genus	Lactobacillus	2	274	#N/A	#N/A	#N/A
All ages	V6	genus	Mesosutterella	0	276	#N/A	#N/A	#N/A
All ages	V6	genus	Intestinimonas	1	275	#N/A	#N/A	#N/A
All ages	V6	genus	Coprobacillus	2	274	#N/A	#N/A	#N/A
All ages	V6	genus	Ellagibacter	0	276	#N/A	#N/A	#N/A
All ages	V6	genus	Hungatella	2	274	#N/A	#N/A	#N/A
All ages	V6	genus	Prevotellamassilia	0	276	#N/A	#N/A	#N/A
All ages	V6	genus	Mitsuokella	0	276	#N/A	#N/A	#N/A
All ages	V6	genus	Methanosphaera	0	276	#N/A	#N/A	#N/A
All ages	V6	genus	Victivallis	0	276	#N/A	#N/A	#N/A
All ages	V6	genus	Olsenella	0	276	#N/A	#N/A	#N/A
All ages	V6	genus	Neglecta	0	276	#N/A	#N/A	#N/A
All ages	V6	genus	Negativibacillus	0	276	#N/A	#N/A	#N/A
All ages	V6	genus	Megasphaera	1	275	#N/A	#N/A	#N/A
All ages	V6	genus	Allisonella	0	276	#N/A	#N/A	#N/A
All ages	V6	genus	Parolsenella	0	276	#N/A	#N/A	#N/A
All ages	V6	genus	Holdemania	1	275	#N/A	#N/A	#N/A
All ages	V6	genus	Pseudoflavonifractor	0	276	#N/A	#N/A	#N/A
All ages	V6	genus	Anaeromassilibacillus	1	275	#N/A	#N/A	#N/A
All ages	V6	genus	Merdimonas	1	275	#N/A	#N/A	#N/A
All ages	V6	genus	Oxalobacter	0	276	#N/A	#N/A	#N/A
All ages	V6	genus	Senegalimassilia	0	276	#N/A	#N/A	#N/A
All ages	V6	genus	Enorma	0	276	#N/A	#N/A	#N/A
All ages	V6	genus	Frisingicoccus	0	276	#N/A	#N/A	#N/A
All ages	V6	genus	Massilimicrobiota	2	274	#N/A	#N/A	#N/A
All ages	V6	genus	Anaerotignum	1	275	#N/A	#N/A	#N/A
All ages	V6	genus	Dakarella	0	276	#N/A	#N/A	#N/A
All ages	V6	genus	Anaerotruncus	1	275	#N/A	#N/A	#N/A
All ages	V6	genus	Turicibacter	2	274	#N/A	#N/A	#N/A
All ages	V6	genus	Blastocystis	0	276	#N/A	#N/A	#N/A
All ages	V6	genus	Mordavella	0	276	#N/A	#N/A	#N/A
All ages	V6	genus	Phocea	1	275	#N/A	#N/A	#N/A
All ages	V6	genus	Methanomassiliicoccus	0	276	#N/A	#N/A	#N/A
All ages	V6	genus	Clostridioides	1	275	#N/A	#N/A	#N/A
All ages	V6	genus	Fusobacterium	0	276	#N/A	#N/A	#N/A
All ages	V6	genus	Raoultella	2	274	#N/A	#N/A	#N/A
All ages	V6	genus	Faecalitalea	0	276	#N/A	#N/A	#N/A
All ages	V6	genus	Mediterranea	0	276	#N/A	#N/A	#N/A
All ages	V6	genus	Emergencia	0	276	#N/A	#N/A	#N/A
All ages	V6	genus	Hafnia	0	276	#N/A	#N/A	#N/A
All ages	V6	genus	Lactococcus	1	275	#N/A	#N/A	#N/A
All ages	V6	genus	Staphylococcus	2	274	#N/A	#N/A	#N/A
All ages	V6	genus	Muribaculum	0	276	#N/A	#N/A	#N/A
All ages	V6	genus	Faecalicatena	1	275	#N/A	#N/A	#N/A
All ages	V6	genus	Brachyspira	0	276	#N/A	#N/A	#N/A
All ages	V6	genus	Porphyromonas	0	276	#N/A	#N/A	#N/A
All ages	V6	genus	Culturomica	0	276	#N/A	#N/A	#N/A
All ages	V6	genus	Acidovorax	0	276	#N/A	#N/A	#N/A
All ages	V6	genus	Comamonas	0	276	#N/A	#N/A	#N/A
All ages	V6	genus	Acinetobacter	1	275	#N/A	#N/A	#N/A
All ages	V6	genus	Actinomyces	1	275	#N/A	#N/A	#N/A
All ages	V6	genus	Aeromonas	0	276	#N/A	#N/A	#N/A
All ages	V6	genus	Fenollaria	0	276	#N/A	#N/A	#N/A
All ages	V6	genus	Arcobacter	0	276	#N/A	#N/A	#N/A
All ages	V6	genus	Methylobacterium	0	276	#N/A	#N/A	#N/A
All ages	V6	genus	Atopobium	1	275	#N/A	#N/A	#N/A
All ages	V6	genus	Turicimonas	0	276	#N/A	#N/A	#N/A
All ages	V6	genus	Caulobacter	0	276	#N/A	#N/A	#N/A
All ages	V6	genus	Chryseobacterium	0	276	#N/A	#N/A	#N/A
All ages	V6	genus	Cloacibacillus	0	276	#N/A	#N/A	#N/A
All ages	V6	genus	Rubneribacter	0	276	#N/A	#N/A	#N/A
All ages	V6	genus	Corynebacterium	1	275	#N/A	#N/A	#N/A
All ages	V6	genus	Cutibacterium	0	276	#N/A	#N/A	#N/A
All ages	V6	genus	Metakosakonia	0	276	#N/A	#N/A	#N/A
All ages	V6	genus	Flavobacterium	0	276	#N/A	#N/A	#N/A
All ages	V6	genus	Sanguibacteroides	0	276	#N/A	#N/A	#N/A
All ages	V6	genus	Gardnerella	0	276	#N/A	#N/A	#N/A
All ages	V6	genus	Granulicatella	0	276	#N/A	#N/A	#N/A
All ages	V6	genus	Kosakonia	0	276	#N/A	#N/A	#N/A
All ages	V6	genus	Lysinibacillus	0	276	#N/A	#N/A	#N/A
All ages	V6	genus	Morganella	1	275	#N/A	#N/A	#N/A
All ages	V6	genus	Mycobacteroides	0	276	#N/A	#N/A	#N/A
All ages	V6	genus	Neisseria	1	275	#N/A	#N/A	#N/A
All ages	V6	genus	Pantoea	0	276	#N/A	#N/A	#N/A
All ages	V6	genus	Pseudomonas	0	276	#N/A	#N/A	#N/A
All ages	V6	genus	Robinsoniella	0	276	#N/A	#N/A	#N/A
All ages	V6	genus	Selenomonas	0	276	#N/A	#N/A	#N/A
All ages	V6	genus	Serratia	0	276	#N/A	#N/A	#N/A
All ages	V6	genus	Shewanella	0	276	#N/A	#N/A	#N/A
All ages	V6	genus	Sphingomonas	0	276	#N/A	#N/A	#N/A
All ages	V6	genus	Stenotrophomonas	0	276	#N/A	#N/A	#N/A
All ages	V6	genus	Kluyvera	0	276	#N/A	#N/A	#N/A
All ages	V6	genus	Atlantibacter	0	276	#N/A	#N/A	#N/A
All ages	V6	genus	Terrisporobacter	0	276	#N/A	#N/A	#N/A
All ages	V6	genus	Macrococcus	0	276	#N/A	#N/A	#N/A
All ages	V6	genus	Anaerosporobacter	0	276	#N/A	#N/A	#N/A
All ages	V6	genus	Schaalia	1	275	#N/A	#N/A	#N/A
All ages	V6	genus	Isoptericola	1	275	#N/A	#N/A	#N/A
All ages	V6	family	Enterobacteriaceae	23	253	0.429971	0.00064161	0.0102658
All ages	V6	family	Ruminococcaceae	25	251	-0.359363	0.00305127	0.0244102
All ages	V6	family	Enterococcaceae	6	270	0.658025	0.00584645	0.031181
All ages	V6	family	Rikenellaceae	4	272	-0.576287	0.0479035	0.127743
All ages	V6	family	Bacteroidaceae	16	260	0.31274	0.0357997	0.127743
All ages	V6	family	Veillonellaceae	9	267	0.392426	0.0452882	0.127743
All ages	V6	family	Lachnospiraceae	56	220	-0.142127	0.100645	0.230046
All ages	V6	family	Erysipelotrichaceae	12	264	0.19697	0.2486	0.4972
All ages	V6	family	Tannerellaceae	4	272	0.248162	0.394288	0.700957
All ages	V6	family	Micrococcaceae	4	272	-0.205882	0.479732	0.725518
All ages	V6	family	Clostridiaceae	26	250	-0.0806154	0.498793	0.725518
All ages	V6	family	Bifidobacteriaceae	9	267	-0.0819809	0.675781	0.831731
All ages	V6	family	Streptococcaceae	12	264	0.0801768	0.638614	0.831731
All ages	V6	family	Sutterellaceae	4	272	-0.0983456	0.735671	0.840767
All ages	V6	family	Eubacteriaceae	6	270	-0.0506173	0.832091	0.887563
All ages	V6	family	Peptostreptococcaceae	5	271	-0.0302583	0.907721	0.907721
All ages	V6	family	Coriobacteriaceae	2	274	#N/A	#N/A	#N/A
All ages	V6	family	Barnesiellaceae	1	275	#N/A	#N/A	#N/A
All ages	V6	family	Odoribacteraceae	1	275	#N/A	#N/A	#N/A
All ages	V6	family	Oscillospiraceae	1	275	#N/A	#N/A	#N/A
All ages	V6	family	Akkermansiaceae	2	274	#N/A	#N/A	#N/A
All ages	V6	family	Prevotellaceae	1	275	#N/A	#N/A	#N/A
All ages	V6	family	Acidaminococcaceae	1	275	#N/A	#N/A	#N/A
All ages	V6	family	Desulfovibrionaceae	1	275	#N/A	#N/A	#N/A
All ages	V6	family	Methanobacteriaceae	0	276	#N/A	#N/A	#N/A
All ages	V6	family	Pasteurellaceae	2	274	#N/A	#N/A	#N/A
All ages	V6	family	Eggerthellaceae	2	274	#N/A	#N/A	#N/A
All ages	V6	family	Selenomonadaceae	0	276	#N/A	#N/A	#N/A
All ages	V6	family	Candidatus Borkfalkiaceae	0	276	#N/A	#N/A	#N/A
All ages	V6	family	Lactobacillaceae	2	274	#N/A	#N/A	#N/A
All ages	V6	family	Clostridiales Family XIII. Incertae Sedis	0	276	#N/A	#N/A	#N/A
All ages	V6	family	Victivallaceae	0	276	#N/A	#N/A	#N/A
All ages	V6	family	Atopobiaceae	1	275	#N/A	#N/A	#N/A
All ages	V6	family	Oxalobacteraceae	0	276	#N/A	#N/A	#N/A
All ages	V6	family	Blastocystidae	0	276	#N/A	#N/A	#N/A
All ages	V6	family	Methanomassiliicoccaceae	0	276	#N/A	#N/A	#N/A
All ages	V6	family	Elusimicrobiaceae	0	276	#N/A	#N/A	#N/A
All ages	V6	family	Fusobacteriaceae	0	276	#N/A	#N/A	#N/A
All ages	V6	family	Hafniaceae	0	276	#N/A	#N/A	#N/A
All ages	V6	family	Staphylococcaceae	2	274	#N/A	#N/A	#N/A
All ages	V6	family	Muribaculaceae	0	276	#N/A	#N/A	#N/A
All ages	V6	family	Brachyspiraceae	0	276	#N/A	#N/A	#N/A
All ages	V6	family	Porphyromonadaceae	0	276	#N/A	#N/A	#N/A
All ages	V6	family	Actinomycetaceae	2	274	#N/A	#N/A	#N/A
All ages	V6	family	Spirochaetaceae	0	276	#N/A	#N/A	#N/A
All ages	V6	family	Comamonadaceae	0	276	#N/A	#N/A	#N/A
All ages	V6	family	Moraxellaceae	1	275	#N/A	#N/A	#N/A
All ages	V6	family	Aeromonadaceae	0	276	#N/A	#N/A	#N/A
All ages	V6	family	Campylobacteraceae	0	276	#N/A	#N/A	#N/A
All ages	V6	family	Methylobacteriaceae	0	276	#N/A	#N/A	#N/A
All ages	V6	family	Caulobacteraceae	0	276	#N/A	#N/A	#N/A
All ages	V6	family	Flavobacteriaceae	0	276	#N/A	#N/A	#N/A
All ages	V6	family	Synergistaceae	0	276	#N/A	#N/A	#N/A
All ages	V6	family	Corynebacteriaceae	1	275	#N/A	#N/A	#N/A
All ages	V6	family	Propionibacteriaceae	0	276	#N/A	#N/A	#N/A
All ages	V6	family	Carnobacteriaceae	0	276	#N/A	#N/A	#N/A
All ages	V6	family	Bacillaceae	0	276	#N/A	#N/A	#N/A
All ages	V6	family	Morganellaceae	1	275	#N/A	#N/A	#N/A
All ages	V6	family	Mycobacteriaceae	0	276	#N/A	#N/A	#N/A
All ages	V6	family	Neisseriaceae	1	275	#N/A	#N/A	#N/A
All ages	V6	family	Erwiniaceae	0	276	#N/A	#N/A	#N/A
All ages	V6	family	Pseudomonadaceae	0	276	#N/A	#N/A	#N/A
All ages	V6	family	Yersiniaceae	0	276	#N/A	#N/A	#N/A
All ages	V6	family	Shewanellaceae	0	276	#N/A	#N/A	#N/A
All ages	V6	family	Sphingomonadaceae	0	276	#N/A	#N/A	#N/A
All ages	V6	family	Xanthomonadaceae	0	276	#N/A	#N/A	#N/A
All ages	V6	family	Promicromonosporaceae	1	275	#N/A	#N/A	#N/A
EE	V0	genus	Veillonella	7	88	-0.621753	0.00636923	0.0437084
EE	V0	genus	Klebsiella	5	90	0.715556	0.00728473	0.0437084
EE	V0	genus	Enterococcus	4	91	0.546703	0.0651832	0.260733
EE	V0	genus	Bacteroides	4	91	-0.395604	0.182089	0.546266
EE	V0	genus	Lactobacillus	5	90	-0.284444	0.286085	0.593654
EE	V0	genus	Clostridium	6	89	-0.207865	0.395769	0.593654
EE	V0	genus	Enterobacter	5	90	0.275556	0.301411	0.593654
EE	V0	genus	Escherichia	3	92	0.311594	0.360102	0.593654
EE	V0	genus	Rothia	4	91	-0.0714286	0.809614	0.994653
EE	V0	genus	Streptococcus	8	87	-0.00143678	0.994653	0.994653
EE	V0	genus	Citrobacter	3	92	0.0289855	0.932156	0.994653
EE	V0	genus	Bifidobacterium	9	86	0.0361757	0.858779	0.994653
EE	V0	genus	Blautia	2	93	#N/A	#N/A	#N/A
EE	V0	genus	Fusicatenibacter	0	95	#N/A	#N/A	#N/A
EE	V0	genus	Parabacteroides	1	94	#N/A	#N/A	#N/A
EE	V0	genus	Alistipes	0	95	#N/A	#N/A	#N/A
EE	V0	genus	Faecalibacterium	0	95	#N/A	#N/A	#N/A
EE	V0	genus	Anaerostipes	1	94	#N/A	#N/A	#N/A
EE	V0	genus	Roseburia	0	95	#N/A	#N/A	#N/A
EE	V0	genus	Eubacterium	0	95	#N/A	#N/A	#N/A
EE	V0	genus	Ruminococcus	0	95	#N/A	#N/A	#N/A
EE	V0	genus	Subdoligranulum	0	95	#N/A	#N/A	#N/A
EE	V0	genus	Collinsella	1	94	#N/A	#N/A	#N/A
EE	V0	genus	Dorea	0	95	#N/A	#N/A	#N/A
EE	V0	genus	Barnesiella	0	95	#N/A	#N/A	#N/A
EE	V0	genus	Anaerobutyricum	0	95	#N/A	#N/A	#N/A
EE	V0	genus	Gemmiger	0	95	#N/A	#N/A	#N/A
EE	V0	genus	Odoribacter	0	95	#N/A	#N/A	#N/A
EE	V0	genus	Coprococcus	2	93	#N/A	#N/A	#N/A
EE	V0	genus	Lachnospira	0	95	#N/A	#N/A	#N/A
EE	V0	genus	Akkermansia	0	95	#N/A	#N/A	#N/A
EE	V0	genus	Prevotella	0	95	#N/A	#N/A	#N/A
EE	V0	genus	Agathobaculum	0	95	#N/A	#N/A	#N/A
EE	V0	genus	Sutterella	0	95	#N/A	#N/A	#N/A
EE	V0	genus	Phascolarctobacterium	0	95	#N/A	#N/A	#N/A
EE	V0	genus	Flavonifractor	2	93	#N/A	#N/A	#N/A
EE	V0	genus	Dialister	0	95	#N/A	#N/A	#N/A
EE	V0	genus	Paraprevotella	0	95	#N/A	#N/A	#N/A
EE	V0	genus	Bilophila	0	95	#N/A	#N/A	#N/A
EE	V0	genus	Parasutterella	0	95	#N/A	#N/A	#N/A
EE	V0	genus	Methanobrevibacter	0	95	#N/A	#N/A	#N/A
EE	V0	genus	Ruthenibacterium	0	95	#N/A	#N/A	#N/A
EE	V0	genus	Haemophilus	1	94	#N/A	#N/A	#N/A
EE	V0	genus	Adlercreutzia	0	95	#N/A	#N/A	#N/A
EE	V0	genus	Butyricicoccus	0	95	#N/A	#N/A	#N/A
EE	V0	genus	Butyrivibrio	0	95	#N/A	#N/A	#N/A
EE	V0	genus	Catenibacterium	0	95	#N/A	#N/A	#N/A
EE	V0	genus	Butyricimonas	0	95	#N/A	#N/A	#N/A
EE	V0	genus	Intestinibacter	1	94	#N/A	#N/A	#N/A
EE	V0	genus	Erysipelatoclostridium	1	94	#N/A	#N/A	#N/A
EE	V0	genus	Tidjanibacter	0	95	#N/A	#N/A	#N/A
EE	V0	genus	Eggerthella	1	94	#N/A	#N/A	#N/A
EE	V0	genus	Coprobacter	0	95	#N/A	#N/A	#N/A
EE	V0	genus	Romboutsia	0	95	#N/A	#N/A	#N/A
EE	V0	genus	Holdemanella	0	95	#N/A	#N/A	#N/A
EE	V0	genus	Duodenibacillus	0	95	#N/A	#N/A	#N/A
EE	V0	genus	Megamonas	0	95	#N/A	#N/A	#N/A
EE	V0	genus	Lachnoclostridium	2	93	#N/A	#N/A	#N/A
EE	V0	genus	Desulfovibrio	0	95	#N/A	#N/A	#N/A
EE	V0	genus	Acidaminococcus	0	95	#N/A	#N/A	#N/A
EE	V0	genus	Oscillibacter	0	95	#N/A	#N/A	#N/A
EE	V0	genus	Sellimonas	0	95	#N/A	#N/A	#N/A
EE	V0	genus	Monoglobus	0	95	#N/A	#N/A	#N/A
EE	V0	genus	Candidatus Borkfalkia	0	95	#N/A	#N/A	#N/A
EE	V0	genus	Mesosutterella	0	95	#N/A	#N/A	#N/A
EE	V0	genus	Intestinimonas	0	95	#N/A	#N/A	#N/A
EE	V0	genus	Coprobacillus	0	95	#N/A	#N/A	#N/A
EE	V0	genus	Ellagibacter	0	95	#N/A	#N/A	#N/A
EE	V0	genus	Hungatella	0	95	#N/A	#N/A	#N/A
EE	V0	genus	Prevotellamassilia	0	95	#N/A	#N/A	#N/A
EE	V0	genus	Eisenbergiella	0	95	#N/A	#N/A	#N/A
EE	V0	genus	Mitsuokella	0	95	#N/A	#N/A	#N/A
EE	V0	genus	Methanosphaera	0	95	#N/A	#N/A	#N/A
EE	V0	genus	Victivallis	0	95	#N/A	#N/A	#N/A
EE	V0	genus	Olsenella	0	95	#N/A	#N/A	#N/A
EE	V0	genus	Neglecta	0	95	#N/A	#N/A	#N/A
EE	V0	genus	Negativibacillus	0	95	#N/A	#N/A	#N/A
EE	V0	genus	Megasphaera	1	94	#N/A	#N/A	#N/A
EE	V0	genus	Allisonella	0	95	#N/A	#N/A	#N/A
EE	V0	genus	Parolsenella	0	95	#N/A	#N/A	#N/A
EE	V0	genus	Holdemania	0	95	#N/A	#N/A	#N/A
EE	V0	genus	Pseudoflavonifractor	0	95	#N/A	#N/A	#N/A
EE	V0	genus	Anaeromassilibacillus	0	95	#N/A	#N/A	#N/A
EE	V0	genus	Merdimonas	0	95	#N/A	#N/A	#N/A
EE	V0	genus	Oxalobacter	0	95	#N/A	#N/A	#N/A
EE	V0	genus	Senegalimassilia	0	95	#N/A	#N/A	#N/A
EE	V0	genus	Enorma	0	95	#N/A	#N/A	#N/A
EE	V0	genus	Frisingicoccus	0	95	#N/A	#N/A	#N/A
EE	V0	genus	Massilimicrobiota	0	95	#N/A	#N/A	#N/A
EE	V0	genus	Anaerotignum	0	95	#N/A	#N/A	#N/A
EE	V0	genus	Dakarella	0	95	#N/A	#N/A	#N/A
EE	V0	genus	Anaerotruncus	0	95	#N/A	#N/A	#N/A
EE	V0	genus	Turicibacter	0	95	#N/A	#N/A	#N/A
EE	V0	genus	Blastocystis	0	95	#N/A	#N/A	#N/A
EE	V0	genus	Mordavella	0	95	#N/A	#N/A	#N/A
EE	V0	genus	Phocea	0	95	#N/A	#N/A	#N/A
EE	V0	genus	Methanomassiliicoccus	0	95	#N/A	#N/A	#N/A
EE	V0	genus	Clostridioides	1	94	#N/A	#N/A	#N/A
EE	V0	genus	Fusobacterium	0	95	#N/A	#N/A	#N/A
EE	V0	genus	Raoultella	2	93	#N/A	#N/A	#N/A
EE	V0	genus	Faecalitalea	0	95	#N/A	#N/A	#N/A
EE	V0	genus	Mediterranea	0	95	#N/A	#N/A	#N/A
EE	V0	genus	Emergencia	0	95	#N/A	#N/A	#N/A
EE	V0	genus	Hafnia	0	95	#N/A	#N/A	#N/A
EE	V0	genus	Lactococcus	1	94	#N/A	#N/A	#N/A
EE	V0	genus	Staphylococcus	2	93	#N/A	#N/A	#N/A
EE	V0	genus	Muribaculum	0	95	#N/A	#N/A	#N/A
EE	V0	genus	Faecalicatena	0	95	#N/A	#N/A	#N/A
EE	V0	genus	Brachyspira	0	95	#N/A	#N/A	#N/A
EE	V0	genus	Porphyromonas	0	95	#N/A	#N/A	#N/A
EE	V0	genus	Culturomica	0	95	#N/A	#N/A	#N/A
EE	V0	genus	Acidovorax	0	95	#N/A	#N/A	#N/A
EE	V0	genus	Comamonas	0	95	#N/A	#N/A	#N/A
EE	V0	genus	Acinetobacter	1	94	#N/A	#N/A	#N/A
EE	V0	genus	Actinomyces	0	95	#N/A	#N/A	#N/A
EE	V0	genus	Aeromonas	0	95	#N/A	#N/A	#N/A
EE	V0	genus	Fenollaria	0	95	#N/A	#N/A	#N/A
EE	V0	genus	Arcobacter	0	95	#N/A	#N/A	#N/A
EE	V0	genus	Methylobacterium	0	95	#N/A	#N/A	#N/A
EE	V0	genus	Atopobium	1	94	#N/A	#N/A	#N/A
EE	V0	genus	Turicimonas	0	95	#N/A	#N/A	#N/A
EE	V0	genus	Caulobacter	0	95	#N/A	#N/A	#N/A
EE	V0	genus	Chryseobacterium	0	95	#N/A	#N/A	#N/A
EE	V0	genus	Cloacibacillus	0	95	#N/A	#N/A	#N/A
EE	V0	genus	Rubneribacter	0	95	#N/A	#N/A	#N/A
EE	V0	genus	Corynebacterium	0	95	#N/A	#N/A	#N/A
EE	V0	genus	Cutibacterium	2	93	#N/A	#N/A	#N/A
EE	V0	genus	Metakosakonia	1	94	#N/A	#N/A	#N/A
EE	V0	genus	Flavobacterium	0	95	#N/A	#N/A	#N/A
EE	V0	genus	Sanguibacteroides	0	95	#N/A	#N/A	#N/A
EE	V0	genus	Gardnerella	0	95	#N/A	#N/A	#N/A
EE	V0	genus	Granulicatella	0	95	#N/A	#N/A	#N/A
EE	V0	genus	Kosakonia	0	95	#N/A	#N/A	#N/A
EE	V0	genus	Lysinibacillus	0	95	#N/A	#N/A	#N/A
EE	V0	genus	Morganella	0	95	#N/A	#N/A	#N/A
EE	V0	genus	Mycobacteroides	0	95	#N/A	#N/A	#N/A
EE	V0	genus	Neisseria	0	95	#N/A	#N/A	#N/A
EE	V0	genus	Pantoea	0	95	#N/A	#N/A	#N/A
EE	V0	genus	Pseudomonas	0	95	#N/A	#N/A	#N/A
EE	V0	genus	Robinsoniella	0	95	#N/A	#N/A	#N/A
EE	V0	genus	Selenomonas	0	95	#N/A	#N/A	#N/A
EE	V0	genus	Serratia	0	95	#N/A	#N/A	#N/A
EE	V0	genus	Shewanella	0	95	#N/A	#N/A	#N/A
EE	V0	genus	Sphingomonas	0	95	#N/A	#N/A	#N/A
EE	V0	genus	Stenotrophomonas	0	95	#N/A	#N/A	#N/A
EE	V0	genus	Kluyvera	0	95	#N/A	#N/A	#N/A
EE	V0	genus	Atlantibacter	0	95	#N/A	#N/A	#N/A
EE	V0	genus	Terrisporobacter	0	95	#N/A	#N/A	#N/A
EE	V0	genus	Macrococcus	0	95	#N/A	#N/A	#N/A
EE	V0	genus	Anaerosporobacter	0	95	#N/A	#N/A	#N/A
EE	V0	genus	Schaalia	0	95	#N/A	#N/A	#N/A
EE	V0	genus	Isoptericola	1	94	#N/A	#N/A	#N/A
EE	V0	family	Veillonellaceae	8	87	-0.5	0.0196994	0.0984971
EE	V0	family	Enterobacteriaceae	20	75	0.362	0.0131886	0.0984971
EE	V0	family	Enterococcaceae	4	91	0.546703	0.0651832	0.217277
EE	V0	family	Bacteroidaceae	4	91	-0.395604	0.182089	0.455222
EE	V0	family	Lactobacillaceae	5	90	-0.284444	0.286085	0.572171
EE	V0	family	Micrococcaceae	4	91	-0.0714286	0.809614	0.913973
EE	V0	family	Lachnospiraceae	9	86	-0.0633075	0.755515	0.913973
EE	V0	family	Clostridiaceae	7	88	-0.0470779	0.836346	0.913973
EE	V0	family	Streptococcaceae	9	86	-0.0219638	0.913973	0.913973
EE	V0	family	Bifidobacteriaceae	9	86	0.0361757	0.858779	0.913973
EE	V0	family	Tannerellaceae	1	94	#N/A	#N/A	#N/A
EE	V0	family	Rikenellaceae	0	95	#N/A	#N/A	#N/A
EE	V0	family	Ruminococcaceae	2	93	#N/A	#N/A	#N/A
EE	V0	family	Eubacteriaceae	0	95	#N/A	#N/A	#N/A
EE	V0	family	Coriobacteriaceae	1	94	#N/A	#N/A	#N/A
EE	V0	family	Barnesiellaceae	0	95	#N/A	#N/A	#N/A
EE	V0	family	Odoribacteraceae	0	95	#N/A	#N/A	#N/A
EE	V0	family	Oscillospiraceae	0	95	#N/A	#N/A	#N/A
EE	V0	family	Akkermansiaceae	0	95	#N/A	#N/A	#N/A
EE	V0	family	Prevotellaceae	0	95	#N/A	#N/A	#N/A
EE	V0	family	Sutterellaceae	0	95	#N/A	#N/A	#N/A
EE	V0	family	Acidaminococcaceae	0	95	#N/A	#N/A	#N/A
EE	V0	family	Desulfovibrionaceae	0	95	#N/A	#N/A	#N/A
EE	V0	family	Erysipelotrichaceae	1	94	#N/A	#N/A	#N/A
EE	V0	family	Methanobacteriaceae	0	95	#N/A	#N/A	#N/A
EE	V0	family	Pasteurellaceae	1	94	#N/A	#N/A	#N/A
EE	V0	family	Eggerthellaceae	1	94	#N/A	#N/A	#N/A
EE	V0	family	Peptostreptococcaceae	2	93	#N/A	#N/A	#N/A
EE	V0	family	Selenomonadaceae	0	95	#N/A	#N/A	#N/A
EE	V0	family	Candidatus Borkfalkiaceae	0	95	#N/A	#N/A	#N/A
EE	V0	family	Clostridiales Family XIII. Incertae Sedis	0	95	#N/A	#N/A	#N/A
EE	V0	family	Victivallaceae	0	95	#N/A	#N/A	#N/A
EE	V0	family	Atopobiaceae	1	94	#N/A	#N/A	#N/A
EE	V0	family	Oxalobacteraceae	0	95	#N/A	#N/A	#N/A
EE	V0	family	Blastocystidae	0	95	#N/A	#N/A	#N/A
EE	V0	family	Methanomassiliicoccaceae	0	95	#N/A	#N/A	#N/A
EE	V0	family	Elusimicrobiaceae	0	95	#N/A	#N/A	#N/A
EE	V0	family	Fusobacteriaceae	0	95	#N/A	#N/A	#N/A
EE	V0	family	Hafniaceae	0	95	#N/A	#N/A	#N/A
EE	V0	family	Staphylococcaceae	2	93	#N/A	#N/A	#N/A
EE	V0	family	Muribaculaceae	0	95	#N/A	#N/A	#N/A
EE	V0	family	Brachyspiraceae	0	95	#N/A	#N/A	#N/A
EE	V0	family	Porphyromonadaceae	0	95	#N/A	#N/A	#N/A
EE	V0	family	Actinomycetaceae	0	95	#N/A	#N/A	#N/A
EE	V0	family	Spirochaetaceae	0	95	#N/A	#N/A	#N/A
EE	V0	family	Comamonadaceae	0	95	#N/A	#N/A	#N/A
EE	V0	family	Moraxellaceae	1	94	#N/A	#N/A	#N/A
EE	V0	family	Aeromonadaceae	0	95	#N/A	#N/A	#N/A
EE	V0	family	Campylobacteraceae	0	95	#N/A	#N/A	#N/A
EE	V0	family	Methylobacteriaceae	0	95	#N/A	#N/A	#N/A
EE	V0	family	Caulobacteraceae	0	95	#N/A	#N/A	#N/A
EE	V0	family	Flavobacteriaceae	0	95	#N/A	#N/A	#N/A
EE	V0	family	Synergistaceae	0	95	#N/A	#N/A	#N/A
EE	V0	family	Corynebacteriaceae	0	95	#N/A	#N/A	#N/A
EE	V0	family	Propionibacteriaceae	2	93	#N/A	#N/A	#N/A
EE	V0	family	Carnobacteriaceae	0	95	#N/A	#N/A	#N/A
EE	V0	family	Bacillaceae	0	95	#N/A	#N/A	#N/A
EE	V0	family	Morganellaceae	0	95	#N/A	#N/A	#N/A
EE	V0	family	Mycobacteriaceae	0	95	#N/A	#N/A	#N/A
EE	V0	family	Neisseriaceae	0	95	#N/A	#N/A	#N/A
EE	V0	family	Erwiniaceae	0	95	#N/A	#N/A	#N/A
EE	V0	family	Pseudomonadaceae	0	95	#N/A	#N/A	#N/A
EE	V0	family	Yersiniaceae	0	95	#N/A	#N/A	#N/A
EE	V0	family	Shewanellaceae	0	95	#N/A	#N/A	#N/A
EE	V0	family	Sphingomonadaceae	0	95	#N/A	#N/A	#N/A
EE	V0	family	Xanthomonadaceae	0	95	#N/A	#N/A	#N/A
EE	V0	family	Promicromonosporaceae	1	94	#N/A	#N/A	#N/A
EE	V1	genus	Bifidobacterium	8	100	0.745	0.000472348	0.00614052
EE	V1	genus	Escherichia	3	105	-0.987302	0.0036471	0.0237061
EE	V1	genus	Enterococcus	6	102	0.517974	0.0335088	0.145205
EE	V1	genus	Streptococcus	9	99	-0.373737	0.064191	0.199836
EE	V1	genus	Klebsiella	5	103	0.469903	0.0768599	0.199836
EE	V1	genus	Citrobacter	4	104	0.473558	0.109055	0.236286
EE	V1	genus	Clostridium	7	101	0.223479	0.324204	0.602093
EE	V1	genus	Bacteroides	4	104	-0.221154	0.454247	0.738151
EE	V1	genus	Blautia	3	105	-0.11746	0.729441	0.828073
EE	V1	genus	Veillonella	7	101	-0.103253	0.648757	0.828073
EE	V1	genus	Enterobacter	5	103	-0.0796117	0.764375	0.828073
EE	V1	genus	Rothia	4	104	0.0961538	0.7449	0.828073
EE	V1	genus	Lachnoclostridium	4	104	0.0408654	0.890017	0.890017
EE	V1	genus	Fusicatenibacter	1	107	#N/A	#N/A	#N/A
EE	V1	genus	Parabacteroides	1	107	#N/A	#N/A	#N/A
EE	V1	genus	Alistipes	0	108	#N/A	#N/A	#N/A
EE	V1	genus	Faecalibacterium	0	108	#N/A	#N/A	#N/A
EE	V1	genus	Anaerostipes	1	107	#N/A	#N/A	#N/A
EE	V1	genus	Roseburia	0	108	#N/A	#N/A	#N/A
EE	V1	genus	Eubacterium	0	108	#N/A	#N/A	#N/A
EE	V1	genus	Ruminococcus	0	108	#N/A	#N/A	#N/A
EE	V1	genus	Subdoligranulum	0	108	#N/A	#N/A	#N/A
EE	V1	genus	Collinsella	1	107	#N/A	#N/A	#N/A
EE	V1	genus	Dorea	0	108	#N/A	#N/A	#N/A
EE	V1	genus	Barnesiella	0	108	#N/A	#N/A	#N/A
EE	V1	genus	Anaerobutyricum	0	108	#N/A	#N/A	#N/A
EE	V1	genus	Gemmiger	0	108	#N/A	#N/A	#N/A
EE	V1	genus	Odoribacter	0	108	#N/A	#N/A	#N/A
EE	V1	genus	Coprococcus	2	106	#N/A	#N/A	#N/A
EE	V1	genus	Lachnospira	0	108	#N/A	#N/A	#N/A
EE	V1	genus	Akkermansia	1	107	#N/A	#N/A	#N/A
EE	V1	genus	Prevotella	0	108	#N/A	#N/A	#N/A
EE	V1	genus	Agathobaculum	0	108	#N/A	#N/A	#N/A
EE	V1	genus	Sutterella	0	108	#N/A	#N/A	#N/A
EE	V1	genus	Phascolarctobacterium	0	108	#N/A	#N/A	#N/A
EE	V1	genus	Flavonifractor	2	106	#N/A	#N/A	#N/A
EE	V1	genus	Dialister	0	108	#N/A	#N/A	#N/A
EE	V1	genus	Paraprevotella	0	108	#N/A	#N/A	#N/A
EE	V1	genus	Bilophila	0	108	#N/A	#N/A	#N/A
EE	V1	genus	Parasutterella	0	108	#N/A	#N/A	#N/A
EE	V1	genus	Methanobrevibacter	0	108	#N/A	#N/A	#N/A
EE	V1	genus	Ruthenibacterium	1	107	#N/A	#N/A	#N/A
EE	V1	genus	Haemophilus	1	107	#N/A	#N/A	#N/A
EE	V1	genus	Adlercreutzia	0	108	#N/A	#N/A	#N/A
EE	V1	genus	Butyricicoccus	0	108	#N/A	#N/A	#N/A
EE	V1	genus	Butyrivibrio	0	108	#N/A	#N/A	#N/A
EE	V1	genus	Catenibacterium	0	108	#N/A	#N/A	#N/A
EE	V1	genus	Butyricimonas	0	108	#N/A	#N/A	#N/A
EE	V1	genus	Intestinibacter	1	107	#N/A	#N/A	#N/A
EE	V1	genus	Erysipelatoclostridium	2	106	#N/A	#N/A	#N/A
EE	V1	genus	Tidjanibacter	0	108	#N/A	#N/A	#N/A
EE	V1	genus	Eggerthella	1	107	#N/A	#N/A	#N/A
EE	V1	genus	Coprobacter	0	108	#N/A	#N/A	#N/A
EE	V1	genus	Romboutsia	0	108	#N/A	#N/A	#N/A
EE	V1	genus	Holdemanella	0	108	#N/A	#N/A	#N/A
EE	V1	genus	Duodenibacillus	0	108	#N/A	#N/A	#N/A
EE	V1	genus	Megamonas	0	108	#N/A	#N/A	#N/A
EE	V1	genus	Desulfovibrio	0	108	#N/A	#N/A	#N/A
EE	V1	genus	Acidaminococcus	0	108	#N/A	#N/A	#N/A
EE	V1	genus	Oscillibacter	0	108	#N/A	#N/A	#N/A
EE	V1	genus	Sellimonas	1	107	#N/A	#N/A	#N/A
EE	V1	genus	Monoglobus	0	108	#N/A	#N/A	#N/A
EE	V1	genus	Candidatus Borkfalkia	0	108	#N/A	#N/A	#N/A
EE	V1	genus	Lactobacillus	2	106	#N/A	#N/A	#N/A
EE	V1	genus	Mesosutterella	0	108	#N/A	#N/A	#N/A
EE	V1	genus	Intestinimonas	0	108	#N/A	#N/A	#N/A
EE	V1	genus	Coprobacillus	1	107	#N/A	#N/A	#N/A
EE	V1	genus	Ellagibacter	0	108	#N/A	#N/A	#N/A
EE	V1	genus	Hungatella	1	107	#N/A	#N/A	#N/A
EE	V1	genus	Prevotellamassilia	0	108	#N/A	#N/A	#N/A
EE	V1	genus	Eisenbergiella	0	108	#N/A	#N/A	#N/A
EE	V1	genus	Mitsuokella	0	108	#N/A	#N/A	#N/A
EE	V1	genus	Methanosphaera	0	108	#N/A	#N/A	#N/A
EE	V1	genus	Victivallis	0	108	#N/A	#N/A	#N/A
EE	V1	genus	Olsenella	0	108	#N/A	#N/A	#N/A
EE	V1	genus	Neglecta	0	108	#N/A	#N/A	#N/A
EE	V1	genus	Negativibacillus	0	108	#N/A	#N/A	#N/A
EE	V1	genus	Megasphaera	1	107	#N/A	#N/A	#N/A
EE	V1	genus	Allisonella	0	108	#N/A	#N/A	#N/A
EE	V1	genus	Parolsenella	0	108	#N/A	#N/A	#N/A
EE	V1	genus	Holdemania	0	108	#N/A	#N/A	#N/A
EE	V1	genus	Pseudoflavonifractor	0	108	#N/A	#N/A	#N/A
EE	V1	genus	Anaeromassilibacillus	0	108	#N/A	#N/A	#N/A
EE	V1	genus	Merdimonas	0	108	#N/A	#N/A	#N/A
EE	V1	genus	Oxalobacter	0	108	#N/A	#N/A	#N/A
EE	V1	genus	Senegalimassilia	0	108	#N/A	#N/A	#N/A
EE	V1	genus	Enorma	0	108	#N/A	#N/A	#N/A
EE	V1	genus	Frisingicoccus	0	108	#N/A	#N/A	#N/A
EE	V1	genus	Massilimicrobiota	0	108	#N/A	#N/A	#N/A
EE	V1	genus	Anaerotignum	0	108	#N/A	#N/A	#N/A
EE	V1	genus	Dakarella	0	108	#N/A	#N/A	#N/A
EE	V1	genus	Anaerotruncus	1	107	#N/A	#N/A	#N/A
EE	V1	genus	Turicibacter	0	108	#N/A	#N/A	#N/A
EE	V1	genus	Blastocystis	0	108	#N/A	#N/A	#N/A
EE	V1	genus	Mordavella	0	108	#N/A	#N/A	#N/A
EE	V1	genus	Phocea	0	108	#N/A	#N/A	#N/A
EE	V1	genus	Methanomassiliicoccus	0	108	#N/A	#N/A	#N/A
EE	V1	genus	Clostridioides	1	107	#N/A	#N/A	#N/A
EE	V1	genus	Fusobacterium	0	108	#N/A	#N/A	#N/A
EE	V1	genus	Raoultella	2	106	#N/A	#N/A	#N/A
EE	V1	genus	Faecalitalea	0	108	#N/A	#N/A	#N/A
EE	V1	genus	Mediterranea	0	108	#N/A	#N/A	#N/A
EE	V1	genus	Emergencia	0	108	#N/A	#N/A	#N/A
EE	V1	genus	Hafnia	0	108	#N/A	#N/A	#N/A
EE	V1	genus	Lactococcus	0	108	#N/A	#N/A	#N/A
EE	V1	genus	Staphylococcus	2	106	#N/A	#N/A	#N/A
EE	V1	genus	Muribaculum	0	108	#N/A	#N/A	#N/A
EE	V1	genus	Faecalicatena	0	108	#N/A	#N/A	#N/A
EE	V1	genus	Brachyspira	0	108	#N/A	#N/A	#N/A
EE	V1	genus	Porphyromonas	0	108	#N/A	#N/A	#N/A
EE	V1	genus	Culturomica	0	108	#N/A	#N/A	#N/A
EE	V1	genus	Acidovorax	0	108	#N/A	#N/A	#N/A
EE	V1	genus	Comamonas	0	108	#N/A	#N/A	#N/A
EE	V1	genus	Acinetobacter	1	107	#N/A	#N/A	#N/A
EE	V1	genus	Actinomyces	0	108	#N/A	#N/A	#N/A
EE	V1	genus	Aeromonas	0	108	#N/A	#N/A	#N/A
EE	V1	genus	Fenollaria	0	108	#N/A	#N/A	#N/A
EE	V1	genus	Arcobacter	0	108	#N/A	#N/A	#N/A
EE	V1	genus	Methylobacterium	0	108	#N/A	#N/A	#N/A
EE	V1	genus	Atopobium	1	107	#N/A	#N/A	#N/A
EE	V1	genus	Turicimonas	0	108	#N/A	#N/A	#N/A
EE	V1	genus	Caulobacter	0	108	#N/A	#N/A	#N/A
EE	V1	genus	Chryseobacterium	0	108	#N/A	#N/A	#N/A
EE	V1	genus	Cloacibacillus	0	108	#N/A	#N/A	#N/A
EE	V1	genus	Rubneribacter	0	108	#N/A	#N/A	#N/A
EE	V1	genus	Corynebacterium	0	108	#N/A	#N/A	#N/A
EE	V1	genus	Cutibacterium	1	107	#N/A	#N/A	#N/A
EE	V1	genus	Metakosakonia	1	107	#N/A	#N/A	#N/A
EE	V1	genus	Flavobacterium	0	108	#N/A	#N/A	#N/A
EE	V1	genus	Sanguibacteroides	0	108	#N/A	#N/A	#N/A
EE	V1	genus	Gardnerella	0	108	#N/A	#N/A	#N/A
EE	V1	genus	Granulicatella	0	108	#N/A	#N/A	#N/A
EE	V1	genus	Kosakonia	0	108	#N/A	#N/A	#N/A
EE	V1	genus	Lysinibacillus	0	108	#N/A	#N/A	#N/A
EE	V1	genus	Morganella	0	108	#N/A	#N/A	#N/A
EE	V1	genus	Mycobacteroides	0	108	#N/A	#N/A	#N/A
EE	V1	genus	Neisseria	0	108	#N/A	#N/A	#N/A
EE	V1	genus	Pantoea	0	108	#N/A	#N/A	#N/A
EE	V1	genus	Pseudomonas	0	108	#N/A	#N/A	#N/A
EE	V1	genus	Robinsoniella	0	108	#N/A	#N/A	#N/A
EE	V1	genus	Selenomonas	0	108	#N/A	#N/A	#N/A
EE	V1	genus	Serratia	0	108	#N/A	#N/A	#N/A
EE	V1	genus	Shewanella	0	108	#N/A	#N/A	#N/A
EE	V1	genus	Sphingomonas	0	108	#N/A	#N/A	#N/A
EE	V1	genus	Stenotrophomonas	0	108	#N/A	#N/A	#N/A
EE	V1	genus	Kluyvera	0	108	#N/A	#N/A	#N/A
EE	V1	genus	Atlantibacter	0	108	#N/A	#N/A	#N/A
EE	V1	genus	Terrisporobacter	1	107	#N/A	#N/A	#N/A
EE	V1	genus	Macrococcus	0	108	#N/A	#N/A	#N/A
EE	V1	genus	Anaerosporobacter	0	108	#N/A	#N/A	#N/A
EE	V1	genus	Schaalia	0	108	#N/A	#N/A	#N/A
EE	V1	genus	Isoptericola	1	107	#N/A	#N/A	#N/A
EE	V1	family	Bifidobacteriaceae	8	100	0.745	0.000472348	0.00566818
EE	V1	family	Enterococcaceae	6	102	0.517974	0.0335088	0.201053
EE	V1	family	Streptococcaceae	9	99	-0.373737	0.064191	0.256764
EE	V1	family	Lachnospiraceae	15	93	-0.192832	0.232127	0.627717
EE	V1	family	Clostridiaceae	9	99	0.226712	0.261549	0.627717
EE	V1	family	Peptostreptococcaceae	3	105	-0.336508	0.321749	0.643498
EE	V1	family	Bacteroidaceae	4	104	-0.221154	0.454247	0.711157
EE	V1	family	Ruminococcaceae	4	104	0.211538	0.474104	0.711157
EE	V1	family	Erysipelotrichaceae	3	105	0.174603	0.607161	0.809548
EE	V1	family	Micrococcaceae	4	104	0.0961538	0.7449	0.89388
EE	V1	family	Veillonellaceae	8	100	-0.04125	0.846514	0.923469
EE	V1	family	Enterobacteriaceae	22	86	-0.00634249	0.963493	0.963493
EE	V1	family	Tannerellaceae	1	107	#N/A	#N/A	#N/A
EE	V1	family	Rikenellaceae	0	108	#N/A	#N/A	#N/A
EE	V1	family	Eubacteriaceae	0	108	#N/A	#N/A	#N/A
EE	V1	family	Coriobacteriaceae	1	107	#N/A	#N/A	#N/A
EE	V1	family	Barnesiellaceae	0	108	#N/A	#N/A	#N/A
EE	V1	family	Odoribacteraceae	0	108	#N/A	#N/A	#N/A
EE	V1	family	Oscillospiraceae	0	108	#N/A	#N/A	#N/A
EE	V1	family	Akkermansiaceae	1	107	#N/A	#N/A	#N/A
EE	V1	family	Prevotellaceae	0	108	#N/A	#N/A	#N/A
EE	V1	family	Sutterellaceae	0	108	#N/A	#N/A	#N/A
EE	V1	family	Acidaminococcaceae	0	108	#N/A	#N/A	#N/A
EE	V1	family	Desulfovibrionaceae	0	108	#N/A	#N/A	#N/A
EE	V1	family	Methanobacteriaceae	0	108	#N/A	#N/A	#N/A
EE	V1	family	Pasteurellaceae	1	107	#N/A	#N/A	#N/A
EE	V1	family	Eggerthellaceae	1	107	#N/A	#N/A	#N/A
EE	V1	family	Selenomonadaceae	0	108	#N/A	#N/A	#N/A
EE	V1	family	Candidatus Borkfalkiaceae	0	108	#N/A	#N/A	#N/A
EE	V1	family	Lactobacillaceae	2	106	#N/A	#N/A	#N/A
EE	V1	family	Clostridiales Family XIII. Incertae Sedis	0	108	#N/A	#N/A	#N/A
EE	V1	family	Victivallaceae	0	108	#N/A	#N/A	#N/A
EE	V1	family	Atopobiaceae	1	107	#N/A	#N/A	#N/A
EE	V1	family	Oxalobacteraceae	0	108	#N/A	#N/A	#N/A
EE	V1	family	Blastocystidae	0	108	#N/A	#N/A	#N/A
EE	V1	family	Methanomassiliicoccaceae	0	108	#N/A	#N/A	#N/A
EE	V1	family	Elusimicrobiaceae	0	108	#N/A	#N/A	#N/A
EE	V1	family	Fusobacteriaceae	0	108	#N/A	#N/A	#N/A
EE	V1	family	Hafniaceae	0	108	#N/A	#N/A	#N/A
EE	V1	family	Staphylococcaceae	2	106	#N/A	#N/A	#N/A
EE	V1	family	Muribaculaceae	0	108	#N/A	#N/A	#N/A
EE	V1	family	Brachyspiraceae	0	108	#N/A	#N/A	#N/A
EE	V1	family	Porphyromonadaceae	0	108	#N/A	#N/A	#N/A
EE	V1	family	Actinomycetaceae	0	108	#N/A	#N/A	#N/A
EE	V1	family	Spirochaetaceae	0	108	#N/A	#N/A	#N/A
EE	V1	family	Comamonadaceae	0	108	#N/A	#N/A	#N/A
EE	V1	family	Moraxellaceae	1	107	#N/A	#N/A	#N/A
EE	V1	family	Aeromonadaceae	0	108	#N/A	#N/A	#N/A
EE	V1	family	Campylobacteraceae	0	108	#N/A	#N/A	#N/A
EE	V1	family	Methylobacteriaceae	0	108	#N/A	#N/A	#N/A
EE	V1	family	Caulobacteraceae	0	108	#N/A	#N/A	#N/A
EE	V1	family	Flavobacteriaceae	0	108	#N/A	#N/A	#N/A
EE	V1	family	Synergistaceae	0	108	#N/A	#N/A	#N/A
EE	V1	family	Corynebacteriaceae	0	108	#N/A	#N/A	#N/A
EE	V1	family	Propionibacteriaceae	1	107	#N/A	#N/A	#N/A
EE	V1	family	Carnobacteriaceae	0	108	#N/A	#N/A	#N/A
EE	V1	family	Bacillaceae	0	108	#N/A	#N/A	#N/A
EE	V1	family	Morganellaceae	0	108	#N/A	#N/A	#N/A
EE	V1	family	Mycobacteriaceae	0	108	#N/A	#N/A	#N/A
EE	V1	family	Neisseriaceae	0	108	#N/A	#N/A	#N/A
EE	V1	family	Erwiniaceae	0	108	#N/A	#N/A	#N/A
EE	V1	family	Pseudomonadaceae	0	108	#N/A	#N/A	#N/A
EE	V1	family	Yersiniaceae	0	108	#N/A	#N/A	#N/A
EE	V1	family	Shewanellaceae	0	108	#N/A	#N/A	#N/A
EE	V1	family	Sphingomonadaceae	0	108	#N/A	#N/A	#N/A
EE	V1	family	Xanthomonadaceae	0	108	#N/A	#N/A	#N/A
EE	V1	family	Promicromonosporaceae	1	107	#N/A	#N/A	#N/A
EE	V3	genus	Klebsiella	4	131	0.837786	0.00439467	0.0615254
EE	V3	genus	Bifidobacterium	8	127	0.512795	0.0151972	0.10638
EE	V3	genus	Enterococcus	6	129	0.439276	0.0695071	0.295292
EE	V3	genus	Citrobacter	4	131	0.507634	0.0843692	0.295292
EE	V3	genus	Lachnoclostridium	9	126	-0.273369	0.171545	0.400273
EE	V3	genus	Rothia	4	131	0.423664	0.149756	0.400273
EE	V3	genus	Blautia	4	131	-0.322519	0.272853	0.477492
EE	V3	genus	Bacteroides	7	128	-0.256696	0.25378	0.477492
EE	V3	genus	Erysipelatoclostridium	3	132	-0.292929	0.386614	0.541259
EE	V3	genus	Escherichia	3	132	0.29798	0.378479	0.541259
EE	V3	genus	Streptococcus	9	126	-0.122575	0.539837	0.581363
EE	V3	genus	Veillonella	8	127	0.151575	0.473018	0.581363
EE	V3	genus	Enterobacter	5	130	0.172308	0.514103	0.581363
EE	V3	genus	Clostridium	7	128	-0.00669643	0.97625	0.97625
EE	V3	genus	Fusicatenibacter	1	134	#N/A	#N/A	#N/A
EE	V3	genus	Parabacteroides	2	133	#N/A	#N/A	#N/A
EE	V3	genus	Alistipes	0	135	#N/A	#N/A	#N/A
EE	V3	genus	Faecalibacterium	0	135	#N/A	#N/A	#N/A
EE	V3	genus	Anaerostipes	2	133	#N/A	#N/A	#N/A
EE	V3	genus	Roseburia	0	135	#N/A	#N/A	#N/A
EE	V3	genus	Eubacterium	0	135	#N/A	#N/A	#N/A
EE	V3	genus	Ruminococcus	0	135	#N/A	#N/A	#N/A
EE	V3	genus	Subdoligranulum	0	135	#N/A	#N/A	#N/A
EE	V3	genus	Collinsella	2	133	#N/A	#N/A	#N/A
EE	V3	genus	Dorea	0	135	#N/A	#N/A	#N/A
EE	V3	genus	Barnesiella	0	135	#N/A	#N/A	#N/A
EE	V3	genus	Anaerobutyricum	0	135	#N/A	#N/A	#N/A
EE	V3	genus	Gemmiger	0	135	#N/A	#N/A	#N/A
EE	V3	genus	Odoribacter	0	135	#N/A	#N/A	#N/A
EE	V3	genus	Coprococcus	2	133	#N/A	#N/A	#N/A
EE	V3	genus	Lachnospira	0	135	#N/A	#N/A	#N/A
EE	V3	genus	Akkermansia	2	133	#N/A	#N/A	#N/A
EE	V3	genus	Prevotella	0	135	#N/A	#N/A	#N/A
EE	V3	genus	Agathobaculum	0	135	#N/A	#N/A	#N/A
EE	V3	genus	Sutterella	0	135	#N/A	#N/A	#N/A
EE	V3	genus	Phascolarctobacterium	1	134	#N/A	#N/A	#N/A
EE	V3	genus	Flavonifractor	2	133	#N/A	#N/A	#N/A
EE	V3	genus	Dialister	0	135	#N/A	#N/A	#N/A
EE	V3	genus	Paraprevotella	0	135	#N/A	#N/A	#N/A
EE	V3	genus	Bilophila	0	135	#N/A	#N/A	#N/A
EE	V3	genus	Parasutterella	0	135	#N/A	#N/A	#N/A
EE	V3	genus	Methanobrevibacter	0	135	#N/A	#N/A	#N/A
EE	V3	genus	Ruthenibacterium	1	134	#N/A	#N/A	#N/A
EE	V3	genus	Haemophilus	2	133	#N/A	#N/A	#N/A
EE	V3	genus	Adlercreutzia	0	135	#N/A	#N/A	#N/A
EE	V3	genus	Butyricicoccus	0	135	#N/A	#N/A	#N/A
EE	V3	genus	Butyrivibrio	0	135	#N/A	#N/A	#N/A
EE	V3	genus	Catenibacterium	0	135	#N/A	#N/A	#N/A
EE	V3	genus	Butyricimonas	0	135	#N/A	#N/A	#N/A
EE	V3	genus	Intestinibacter	1	134	#N/A	#N/A	#N/A
EE	V3	genus	Tidjanibacter	0	135	#N/A	#N/A	#N/A
EE	V3	genus	Eggerthella	1	134	#N/A	#N/A	#N/A
EE	V3	genus	Coprobacter	0	135	#N/A	#N/A	#N/A
EE	V3	genus	Romboutsia	1	134	#N/A	#N/A	#N/A
EE	V3	genus	Holdemanella	0	135	#N/A	#N/A	#N/A
EE	V3	genus	Duodenibacillus	0	135	#N/A	#N/A	#N/A
EE	V3	genus	Megamonas	0	135	#N/A	#N/A	#N/A
EE	V3	genus	Desulfovibrio	0	135	#N/A	#N/A	#N/A
EE	V3	genus	Acidaminococcus	0	135	#N/A	#N/A	#N/A
EE	V3	genus	Oscillibacter	0	135	#N/A	#N/A	#N/A
EE	V3	genus	Sellimonas	1	134	#N/A	#N/A	#N/A
EE	V3	genus	Monoglobus	0	135	#N/A	#N/A	#N/A
EE	V3	genus	Candidatus Borkfalkia	0	135	#N/A	#N/A	#N/A
EE	V3	genus	Lactobacillus	1	134	#N/A	#N/A	#N/A
EE	V3	genus	Mesosutterella	0	135	#N/A	#N/A	#N/A
EE	V3	genus	Intestinimonas	0	135	#N/A	#N/A	#N/A
EE	V3	genus	Coprobacillus	1	134	#N/A	#N/A	#N/A
EE	V3	genus	Ellagibacter	0	135	#N/A	#N/A	#N/A
EE	V3	genus	Hungatella	2	133	#N/A	#N/A	#N/A
EE	V3	genus	Prevotellamassilia	0	135	#N/A	#N/A	#N/A
EE	V3	genus	Eisenbergiella	0	135	#N/A	#N/A	#N/A
EE	V3	genus	Mitsuokella	0	135	#N/A	#N/A	#N/A
EE	V3	genus	Methanosphaera	0	135	#N/A	#N/A	#N/A
EE	V3	genus	Victivallis	0	135	#N/A	#N/A	#N/A
EE	V3	genus	Olsenella	0	135	#N/A	#N/A	#N/A
EE	V3	genus	Neglecta	0	135	#N/A	#N/A	#N/A
EE	V3	genus	Negativibacillus	0	135	#N/A	#N/A	#N/A
EE	V3	genus	Megasphaera	1	134	#N/A	#N/A	#N/A
EE	V3	genus	Allisonella	0	135	#N/A	#N/A	#N/A
EE	V3	genus	Parolsenella	0	135	#N/A	#N/A	#N/A
EE	V3	genus	Holdemania	0	135	#N/A	#N/A	#N/A
EE	V3	genus	Pseudoflavonifractor	0	135	#N/A	#N/A	#N/A
EE	V3	genus	Anaeromassilibacillus	0	135	#N/A	#N/A	#N/A
EE	V3	genus	Merdimonas	0	135	#N/A	#N/A	#N/A
EE	V3	genus	Oxalobacter	0	135	#N/A	#N/A	#N/A
EE	V3	genus	Senegalimassilia	0	135	#N/A	#N/A	#N/A
EE	V3	genus	Enorma	0	135	#N/A	#N/A	#N/A
EE	V3	genus	Frisingicoccus	0	135	#N/A	#N/A	#N/A
EE	V3	genus	Massilimicrobiota	0	135	#N/A	#N/A	#N/A
EE	V3	genus	Anaerotignum	0	135	#N/A	#N/A	#N/A
EE	V3	genus	Dakarella	0	135	#N/A	#N/A	#N/A
EE	V3	genus	Anaerotruncus	1	134	#N/A	#N/A	#N/A
EE	V3	genus	Turicibacter	0	135	#N/A	#N/A	#N/A
EE	V3	genus	Blastocystis	0	135	#N/A	#N/A	#N/A
EE	V3	genus	Mordavella	0	135	#N/A	#N/A	#N/A
EE	V3	genus	Phocea	0	135	#N/A	#N/A	#N/A
EE	V3	genus	Methanomassiliicoccus	0	135	#N/A	#N/A	#N/A
EE	V3	genus	Clostridioides	1	134	#N/A	#N/A	#N/A
EE	V3	genus	Fusobacterium	0	135	#N/A	#N/A	#N/A
EE	V3	genus	Raoultella	1	134	#N/A	#N/A	#N/A
EE	V3	genus	Faecalitalea	0	135	#N/A	#N/A	#N/A
EE	V3	genus	Mediterranea	0	135	#N/A	#N/A	#N/A
EE	V3	genus	Emergencia	0	135	#N/A	#N/A	#N/A
EE	V3	genus	Hafnia	0	135	#N/A	#N/A	#N/A
EE	V3	genus	Lactococcus	2	133	#N/A	#N/A	#N/A
EE	V3	genus	Staphylococcus	2	133	#N/A	#N/A	#N/A
EE	V3	genus	Muribaculum	0	135	#N/A	#N/A	#N/A
EE	V3	genus	Faecalicatena	1	134	#N/A	#N/A	#N/A
EE	V3	genus	Brachyspira	0	135	#N/A	#N/A	#N/A
EE	V3	genus	Porphyromonas	0	135	#N/A	#N/A	#N/A
EE	V3	genus	Culturomica	0	135	#N/A	#N/A	#N/A
EE	V3	genus	Acidovorax	0	135	#N/A	#N/A	#N/A
EE	V3	genus	Comamonas	0	135	#N/A	#N/A	#N/A
EE	V3	genus	Acinetobacter	1	134	#N/A	#N/A	#N/A
EE	V3	genus	Actinomyces	0	135	#N/A	#N/A	#N/A
EE	V3	genus	Aeromonas	0	135	#N/A	#N/A	#N/A
EE	V3	genus	Fenollaria	0	135	#N/A	#N/A	#N/A
EE	V3	genus	Arcobacter	0	135	#N/A	#N/A	#N/A
EE	V3	genus	Methylobacterium	0	135	#N/A	#N/A	#N/A
EE	V3	genus	Atopobium	1	134	#N/A	#N/A	#N/A
EE	V3	genus	Turicimonas	0	135	#N/A	#N/A	#N/A
EE	V3	genus	Caulobacter	0	135	#N/A	#N/A	#N/A
EE	V3	genus	Chryseobacterium	0	135	#N/A	#N/A	#N/A
EE	V3	genus	Cloacibacillus	0	135	#N/A	#N/A	#N/A
EE	V3	genus	Rubneribacter	0	135	#N/A	#N/A	#N/A
EE	V3	genus	Corynebacterium	1	134	#N/A	#N/A	#N/A
EE	V3	genus	Cutibacterium	1	134	#N/A	#N/A	#N/A
EE	V3	genus	Metakosakonia	1	134	#N/A	#N/A	#N/A
EE	V3	genus	Flavobacterium	0	135	#N/A	#N/A	#N/A
EE	V3	genus	Sanguibacteroides	0	135	#N/A	#N/A	#N/A
EE	V3	genus	Gardnerella	0	135	#N/A	#N/A	#N/A
EE	V3	genus	Granulicatella	0	135	#N/A	#N/A	#N/A
EE	V3	genus	Kosakonia	0	135	#N/A	#N/A	#N/A
EE	V3	genus	Lysinibacillus	0	135	#N/A	#N/A	#N/A
EE	V3	genus	Morganella	1	134	#N/A	#N/A	#N/A
EE	V3	genus	Mycobacteroides	0	135	#N/A	#N/A	#N/A
EE	V3	genus	Neisseria	1	134	#N/A	#N/A	#N/A
EE	V3	genus	Pantoea	0	135	#N/A	#N/A	#N/A
EE	V3	genus	Pseudomonas	0	135	#N/A	#N/A	#N/A
EE	V3	genus	Robinsoniella	0	135	#N/A	#N/A	#N/A
EE	V3	genus	Selenomonas	0	135	#N/A	#N/A	#N/A
EE	V3	genus	Serratia	0	135	#N/A	#N/A	#N/A
EE	V3	genus	Shewanella	0	135	#N/A	#N/A	#N/A
EE	V3	genus	Sphingomonas	0	135	#N/A	#N/A	#N/A
EE	V3	genus	Stenotrophomonas	0	135	#N/A	#N/A	#N/A
EE	V3	genus	Kluyvera	0	135	#N/A	#N/A	#N/A
EE	V3	genus	Atlantibacter	0	135	#N/A	#N/A	#N/A
EE	V3	genus	Terrisporobacter	1	134	#N/A	#N/A	#N/A
EE	V3	genus	Macrococcus	0	135	#N/A	#N/A	#N/A
EE	V3	genus	Anaerosporobacter	0	135	#N/A	#N/A	#N/A
EE	V3	genus	Schaalia	1	134	#N/A	#N/A	#N/A
EE	V3	genus	Isoptericola	1	134	#N/A	#N/A	#N/A
EE	V3	family	Enterobacteriaceae	20	115	0.496957	0.000400456	0.00480547
EE	V3	family	Lachnospiraceae	24	111	-0.321697	0.0136599	0.0607888
EE	V3	family	Bifidobacteriaceae	8	127	0.512795	0.0151972	0.0607888
EE	V3	family	Enterococcaceae	6	129	0.439276	0.0695071	0.208521
EE	V3	family	Ruminococcaceae	4	131	-0.494275	0.0928676	0.222882
EE	V3	family	Erysipelotrichaceae	4	131	-0.461832	0.116378	0.232756
EE	V3	family	Micrococcaceae	4	131	0.423664	0.149756	0.256724
EE	V3	family	Bacteroidaceae	7	128	-0.256696	0.25378	0.38067
EE	V3	family	Veillonellaceae	9	126	0.204586	0.306196	0.408262
EE	V3	family	Peptostreptococcaceae	4	131	-0.215649	0.463452	0.556143
EE	V3	family	Streptococcaceae	11	124	-0.110704	0.543688	0.593114
EE	V3	family	Clostridiaceae	11	124	-0.0483871	0.790687	0.790687
EE	V3	family	Tannerellaceae	2	133	#N/A	#N/A	#N/A
EE	V3	family	Rikenellaceae	0	135	#N/A	#N/A	#N/A
EE	V3	family	Eubacteriaceae	0	135	#N/A	#N/A	#N/A
EE	V3	family	Coriobacteriaceae	2	133	#N/A	#N/A	#N/A
EE	V3	family	Barnesiellaceae	0	135	#N/A	#N/A	#N/A
EE	V3	family	Odoribacteraceae	0	135	#N/A	#N/A	#N/A
EE	V3	family	Oscillospiraceae	1	134	#N/A	#N/A	#N/A
EE	V3	family	Akkermansiaceae	2	133	#N/A	#N/A	#N/A
EE	V3	family	Prevotellaceae	0	135	#N/A	#N/A	#N/A
EE	V3	family	Sutterellaceae	0	135	#N/A	#N/A	#N/A
EE	V3	family	Acidaminococcaceae	1	134	#N/A	#N/A	#N/A
EE	V3	family	Desulfovibrionaceae	0	135	#N/A	#N/A	#N/A
EE	V3	family	Methanobacteriaceae	0	135	#N/A	#N/A	#N/A
EE	V3	family	Pasteurellaceae	2	133	#N/A	#N/A	#N/A
EE	V3	family	Eggerthellaceae	1	134	#N/A	#N/A	#N/A
EE	V3	family	Selenomonadaceae	0	135	#N/A	#N/A	#N/A
EE	V3	family	Candidatus Borkfalkiaceae	0	135	#N/A	#N/A	#N/A
EE	V3	family	Lactobacillaceae	1	134	#N/A	#N/A	#N/A
EE	V3	family	Clostridiales Family XIII. Incertae Sedis	0	135	#N/A	#N/A	#N/A
EE	V3	family	Victivallaceae	0	135	#N/A	#N/A	#N/A
EE	V3	family	Atopobiaceae	1	134	#N/A	#N/A	#N/A
EE	V3	family	Oxalobacteraceae	0	135	#N/A	#N/A	#N/A
EE	V3	family	Blastocystidae	0	135	#N/A	#N/A	#N/A
EE	V3	family	Methanomassiliicoccaceae	0	135	#N/A	#N/A	#N/A
EE	V3	family	Elusimicrobiaceae	0	135	#N/A	#N/A	#N/A
EE	V3	family	Fusobacteriaceae	0	135	#N/A	#N/A	#N/A
EE	V3	family	Hafniaceae	0	135	#N/A	#N/A	#N/A
EE	V3	family	Staphylococcaceae	2	133	#N/A	#N/A	#N/A
EE	V3	family	Muribaculaceae	0	135	#N/A	#N/A	#N/A
EE	V3	family	Brachyspiraceae	0	135	#N/A	#N/A	#N/A
EE	V3	family	Porphyromonadaceae	0	135	#N/A	#N/A	#N/A
EE	V3	family	Actinomycetaceae	1	134	#N/A	#N/A	#N/A
EE	V3	family	Spirochaetaceae	0	135	#N/A	#N/A	#N/A
EE	V3	family	Comamonadaceae	0	135	#N/A	#N/A	#N/A
EE	V3	family	Moraxellaceae	1	134	#N/A	#N/A	#N/A
EE	V3	family	Aeromonadaceae	0	135	#N/A	#N/A	#N/A
EE	V3	family	Campylobacteraceae	0	135	#N/A	#N/A	#N/A
EE	V3	family	Methylobacteriaceae	0	135	#N/A	#N/A	#N/A
EE	V3	family	Caulobacteraceae	0	135	#N/A	#N/A	#N/A
EE	V3	family	Flavobacteriaceae	0	135	#N/A	#N/A	#N/A
EE	V3	family	Synergistaceae	0	135	#N/A	#N/A	#N/A
EE	V3	family	Corynebacteriaceae	1	134	#N/A	#N/A	#N/A
EE	V3	family	Propionibacteriaceae	1	134	#N/A	#N/A	#N/A
EE	V3	family	Carnobacteriaceae	0	135	#N/A	#N/A	#N/A
EE	V3	family	Bacillaceae	0	135	#N/A	#N/A	#N/A
EE	V3	family	Morganellaceae	1	134	#N/A	#N/A	#N/A
EE	V3	family	Mycobacteriaceae	0	135	#N/A	#N/A	#N/A
EE	V3	family	Neisseriaceae	1	134	#N/A	#N/A	#N/A
EE	V3	family	Erwiniaceae	0	135	#N/A	#N/A	#N/A
EE	V3	family	Pseudomonadaceae	0	135	#N/A	#N/A	#N/A
EE	V3	family	Yersiniaceae	0	135	#N/A	#N/A	#N/A
EE	V3	family	Shewanellaceae	0	135	#N/A	#N/A	#N/A
EE	V3	family	Sphingomonadaceae	0	135	#N/A	#N/A	#N/A
EE	V3	family	Xanthomonadaceae	0	135	#N/A	#N/A	#N/A
EE	V3	family	Promicromonosporaceae	1	134	#N/A	#N/A	#N/A
EE	V6	genus	Faecalibacterium	3	178	-0.644195	0.0559722	0.298518
EE	V6	genus	Veillonella	6	175	0.541905	0.0241655	0.298518
EE	V6	genus	Escherichia	3	178	0.670412	0.0466972	0.298518
EE	V6	genus	Roseburia	4	177	-0.461864	0.114604	0.30561
EE	V6	genus	Blautia	6	175	0.380952	0.112994	0.30561
EE	V6	genus	Klebsiella	3	178	0.573034	0.0891073	0.30561
EE	V6	genus	Enterococcus	3	178	0.490637	0.145486	0.332539
EE	V6	genus	Erysipelatoclostridium	3	178	0.460674	0.171698	0.343396
EE	V6	genus	Bacteroides	12	169	0.176036	0.308771	0.504389
EE	V6	genus	Streptococcus	8	173	0.21026	0.315243	0.504389
EE	V6	genus	Ruminococcus	3	178	-0.280899	0.404622	0.588541
EE	V6	genus	Lachnoclostridium	10	171	0.0883041	0.639196	0.79347
EE	V6	genus	Anaerostipes	3	178	0.155431	0.644694	0.79347
EE	V6	genus	Enterobacter	5	176	-0.1	0.703303	0.803775
EE	V6	genus	Bifidobacterium	9	172	-0.0297158	0.88068	0.929792
EE	V6	genus	Clostridium	9	172	-0.0174419	0.929792	0.929792
EE	V6	genus	Fusicatenibacter	1	180	#N/A	#N/A	#N/A
EE	V6	genus	Parabacteroides	2	179	#N/A	#N/A	#N/A
EE	V6	genus	Alistipes	1	180	#N/A	#N/A	#N/A
EE	V6	genus	Eubacterium	1	180	#N/A	#N/A	#N/A
EE	V6	genus	Subdoligranulum	0	181	#N/A	#N/A	#N/A
EE	V6	genus	Collinsella	2	179	#N/A	#N/A	#N/A
EE	V6	genus	Dorea	1	180	#N/A	#N/A	#N/A
EE	V6	genus	Barnesiella	0	181	#N/A	#N/A	#N/A
EE	V6	genus	Anaerobutyricum	1	180	#N/A	#N/A	#N/A
EE	V6	genus	Gemmiger	1	180	#N/A	#N/A	#N/A
EE	V6	genus	Odoribacter	0	181	#N/A	#N/A	#N/A
EE	V6	genus	Coprococcus	2	179	#N/A	#N/A	#N/A
EE	V6	genus	Lachnospira	1	180	#N/A	#N/A	#N/A
EE	V6	genus	Akkermansia	1	180	#N/A	#N/A	#N/A
EE	V6	genus	Prevotella	0	181	#N/A	#N/A	#N/A
EE	V6	genus	Agathobaculum	1	180	#N/A	#N/A	#N/A
EE	V6	genus	Sutterella	0	181	#N/A	#N/A	#N/A
EE	V6	genus	Phascolarctobacterium	0	181	#N/A	#N/A	#N/A
EE	V6	genus	Flavonifractor	2	179	#N/A	#N/A	#N/A
EE	V6	genus	Dialister	1	180	#N/A	#N/A	#N/A
EE	V6	genus	Paraprevotella	0	181	#N/A	#N/A	#N/A
EE	V6	genus	Bilophila	1	180	#N/A	#N/A	#N/A
EE	V6	genus	Parasutterella	2	179	#N/A	#N/A	#N/A
EE	V6	genus	Methanobrevibacter	0	181	#N/A	#N/A	#N/A
EE	V6	genus	Ruthenibacterium	1	180	#N/A	#N/A	#N/A
EE	V6	genus	Haemophilus	1	180	#N/A	#N/A	#N/A
EE	V6	genus	Adlercreutzia	0	181	#N/A	#N/A	#N/A
EE	V6	genus	Butyricicoccus	1	180	#N/A	#N/A	#N/A
EE	V6	genus	Butyrivibrio	0	181	#N/A	#N/A	#N/A
EE	V6	genus	Catenibacterium	0	181	#N/A	#N/A	#N/A
EE	V6	genus	Butyricimonas	0	181	#N/A	#N/A	#N/A
EE	V6	genus	Intestinibacter	1	180	#N/A	#N/A	#N/A
EE	V6	genus	Tidjanibacter	0	181	#N/A	#N/A	#N/A
EE	V6	genus	Eggerthella	1	180	#N/A	#N/A	#N/A
EE	V6	genus	Coprobacter	0	181	#N/A	#N/A	#N/A
EE	V6	genus	Romboutsia	1	180	#N/A	#N/A	#N/A
EE	V6	genus	Holdemanella	0	181	#N/A	#N/A	#N/A
EE	V6	genus	Duodenibacillus	0	181	#N/A	#N/A	#N/A
EE	V6	genus	Megamonas	0	181	#N/A	#N/A	#N/A
EE	V6	genus	Desulfovibrio	0	181	#N/A	#N/A	#N/A
EE	V6	genus	Acidaminococcus	0	181	#N/A	#N/A	#N/A
EE	V6	genus	Oscillibacter	0	181	#N/A	#N/A	#N/A
EE	V6	genus	Sellimonas	1	180	#N/A	#N/A	#N/A
EE	V6	genus	Monoglobus	0	181	#N/A	#N/A	#N/A
EE	V6	genus	Candidatus Borkfalkia	0	181	#N/A	#N/A	#N/A
EE	V6	genus	Lactobacillus	0	181	#N/A	#N/A	#N/A
EE	V6	genus	Mesosutterella	0	181	#N/A	#N/A	#N/A
EE	V6	genus	Intestinimonas	1	180	#N/A	#N/A	#N/A
EE	V6	genus	Coprobacillus	1	180	#N/A	#N/A	#N/A
EE	V6	genus	Ellagibacter	0	181	#N/A	#N/A	#N/A
EE	V6	genus	Hungatella	2	179	#N/A	#N/A	#N/A
EE	V6	genus	Prevotellamassilia	0	181	#N/A	#N/A	#N/A
EE	V6	genus	Eisenbergiella	2	179	#N/A	#N/A	#N/A
EE	V6	genus	Mitsuokella	0	181	#N/A	#N/A	#N/A
EE	V6	genus	Methanosphaera	0	181	#N/A	#N/A	#N/A
EE	V6	genus	Victivallis	0	181	#N/A	#N/A	#N/A
EE	V6	genus	Olsenella	0	181	#N/A	#N/A	#N/A
EE	V6	genus	Neglecta	0	181	#N/A	#N/A	#N/A
EE	V6	genus	Negativibacillus	0	181	#N/A	#N/A	#N/A
EE	V6	genus	Megasphaera	1	180	#N/A	#N/A	#N/A
EE	V6	genus	Allisonella	0	181	#N/A	#N/A	#N/A
EE	V6	genus	Parolsenella	0	181	#N/A	#N/A	#N/A
EE	V6	genus	Holdemania	0	181	#N/A	#N/A	#N/A
EE	V6	genus	Pseudoflavonifractor	0	181	#N/A	#N/A	#N/A
EE	V6	genus	Anaeromassilibacillus	1	180	#N/A	#N/A	#N/A
EE	V6	genus	Merdimonas	1	180	#N/A	#N/A	#N/A
EE	V6	genus	Oxalobacter	0	181	#N/A	#N/A	#N/A
EE	V6	genus	Citrobacter	2	179	#N/A	#N/A	#N/A
EE	V6	genus	Senegalimassilia	0	181	#N/A	#N/A	#N/A
EE	V6	genus	Enorma	0	181	#N/A	#N/A	#N/A
EE	V6	genus	Frisingicoccus	0	181	#N/A	#N/A	#N/A
EE	V6	genus	Massilimicrobiota	1	180	#N/A	#N/A	#N/A
EE	V6	genus	Rothia	2	179	#N/A	#N/A	#N/A
EE	V6	genus	Anaerotignum	1	180	#N/A	#N/A	#N/A
EE	V6	genus	Dakarella	0	181	#N/A	#N/A	#N/A
EE	V6	genus	Anaerotruncus	1	180	#N/A	#N/A	#N/A
EE	V6	genus	Turicibacter	2	179	#N/A	#N/A	#N/A
EE	V6	genus	Blastocystis	0	181	#N/A	#N/A	#N/A
EE	V6	genus	Mordavella	0	181	#N/A	#N/A	#N/A
EE	V6	genus	Phocea	1	180	#N/A	#N/A	#N/A
EE	V6	genus	Methanomassiliicoccus	0	181	#N/A	#N/A	#N/A
EE	V6	genus	Clostridioides	1	180	#N/A	#N/A	#N/A
EE	V6	genus	Fusobacterium	0	181	#N/A	#N/A	#N/A
EE	V6	genus	Raoultella	0	181	#N/A	#N/A	#N/A
EE	V6	genus	Faecalitalea	0	181	#N/A	#N/A	#N/A
EE	V6	genus	Mediterranea	0	181	#N/A	#N/A	#N/A
EE	V6	genus	Emergencia	0	181	#N/A	#N/A	#N/A
EE	V6	genus	Hafnia	0	181	#N/A	#N/A	#N/A
EE	V6	genus	Lactococcus	1	180	#N/A	#N/A	#N/A
EE	V6	genus	Staphylococcus	0	181	#N/A	#N/A	#N/A
EE	V6	genus	Muribaculum	0	181	#N/A	#N/A	#N/A
EE	V6	genus	Faecalicatena	1	180	#N/A	#N/A	#N/A
EE	V6	genus	Brachyspira	0	181	#N/A	#N/A	#N/A
EE	V6	genus	Porphyromonas	0	181	#N/A	#N/A	#N/A
EE	V6	genus	Culturomica	0	181	#N/A	#N/A	#N/A
EE	V6	genus	Acidovorax	0	181	#N/A	#N/A	#N/A
EE	V6	genus	Comamonas	0	181	#N/A	#N/A	#N/A
EE	V6	genus	Acinetobacter	1	180	#N/A	#N/A	#N/A
EE	V6	genus	Actinomyces	1	180	#N/A	#N/A	#N/A
EE	V6	genus	Aeromonas	0	181	#N/A	#N/A	#N/A
EE	V6	genus	Fenollaria	0	181	#N/A	#N/A	#N/A
EE	V6	genus	Arcobacter	0	181	#N/A	#N/A	#N/A
EE	V6	genus	Methylobacterium	0	181	#N/A	#N/A	#N/A
EE	V6	genus	Atopobium	1	180	#N/A	#N/A	#N/A
EE	V6	genus	Turicimonas	0	181	#N/A	#N/A	#N/A
EE	V6	genus	Caulobacter	0	181	#N/A	#N/A	#N/A
EE	V6	genus	Chryseobacterium	0	181	#N/A	#N/A	#N/A
EE	V6	genus	Cloacibacillus	0	181	#N/A	#N/A	#N/A
EE	V6	genus	Rubneribacter	0	181	#N/A	#N/A	#N/A
EE	V6	genus	Corynebacterium	0	181	#N/A	#N/A	#N/A
EE	V6	genus	Cutibacterium	0	181	#N/A	#N/A	#N/A
EE	V6	genus	Metakosakonia	0	181	#N/A	#N/A	#N/A
EE	V6	genus	Flavobacterium	0	181	#N/A	#N/A	#N/A
EE	V6	genus	Sanguibacteroides	0	181	#N/A	#N/A	#N/A
EE	V6	genus	Gardnerella	0	181	#N/A	#N/A	#N/A
EE	V6	genus	Granulicatella	0	181	#N/A	#N/A	#N/A
EE	V6	genus	Kosakonia	0	181	#N/A	#N/A	#N/A
EE	V6	genus	Lysinibacillus	0	181	#N/A	#N/A	#N/A
EE	V6	genus	Morganella	0	181	#N/A	#N/A	#N/A
EE	V6	genus	Mycobacteroides	0	181	#N/A	#N/A	#N/A
EE	V6	genus	Neisseria	1	180	#N/A	#N/A	#N/A
EE	V6	genus	Pantoea	0	181	#N/A	#N/A	#N/A
EE	V6	genus	Pseudomonas	0	181	#N/A	#N/A	#N/A
EE	V6	genus	Robinsoniella	0	181	#N/A	#N/A	#N/A
EE	V6	genus	Selenomonas	0	181	#N/A	#N/A	#N/A
EE	V6	genus	Serratia	0	181	#N/A	#N/A	#N/A
EE	V6	genus	Shewanella	0	181	#N/A	#N/A	#N/A
EE	V6	genus	Sphingomonas	0	181	#N/A	#N/A	#N/A
EE	V6	genus	Stenotrophomonas	0	181	#N/A	#N/A	#N/A
EE	V6	genus	Kluyvera	0	181	#N/A	#N/A	#N/A
EE	V6	genus	Atlantibacter	0	181	#N/A	#N/A	#N/A
EE	V6	genus	Terrisporobacter	0	181	#N/A	#N/A	#N/A
EE	V6	genus	Macrococcus	0	181	#N/A	#N/A	#N/A
EE	V6	genus	Anaerosporobacter	0	181	#N/A	#N/A	#N/A
EE	V6	genus	Schaalia	1	180	#N/A	#N/A	#N/A
EE	V6	genus	Isoptericola	1	180	#N/A	#N/A	#N/A
EE	V6	family	Veillonellaceae	8	173	0.646676	0.00200989	0.0221088
EE	V6	family	Ruminococcaceae	16	165	-0.367803	0.015253	0.0583355
EE	V6	family	Enterobacteriaceae	14	167	0.388366	0.0159097	0.0583355
EE	V6	family	Enterococcaceae	3	178	0.490637	0.145486	0.400086
EE	V6	family	Streptococcaceae	9	172	0.257752	0.19291	0.424401
EE	V6	family	Clostridiaceae	20	161	-0.13354	0.3306	0.454575
EE	V6	family	Lachnospiraceae	43	138	-0.09909	0.327078	0.454575
EE	V6	family	Bacteroidaceae	12	169	0.176036	0.308771	0.454575
EE	V6	family	Erysipelotrichaceae	9	172	0.153101	0.439297	0.536919
EE	V6	family	Bifidobacteriaceae	9	172	-0.0297158	0.88068	0.88068
EE	V6	family	Peptostreptococcaceae	5	176	0.0659091	0.801795	0.88068
EE	V6	family	Tannerellaceae	2	179	#N/A	#N/A	#N/A
EE	V6	family	Rikenellaceae	1	180	#N/A	#N/A	#N/A
EE	V6	family	Eubacteriaceae	1	180	#N/A	#N/A	#N/A
EE	V6	family	Coriobacteriaceae	2	179	#N/A	#N/A	#N/A
EE	V6	family	Barnesiellaceae	0	181	#N/A	#N/A	#N/A
EE	V6	family	Odoribacteraceae	0	181	#N/A	#N/A	#N/A
EE	V6	family	Oscillospiraceae	1	180	#N/A	#N/A	#N/A
EE	V6	family	Akkermansiaceae	1	180	#N/A	#N/A	#N/A
EE	V6	family	Prevotellaceae	0	181	#N/A	#N/A	#N/A
EE	V6	family	Sutterellaceae	2	179	#N/A	#N/A	#N/A
EE	V6	family	Acidaminococcaceae	0	181	#N/A	#N/A	#N/A
EE	V6	family	Desulfovibrionaceae	1	180	#N/A	#N/A	#N/A
EE	V6	family	Methanobacteriaceae	0	181	#N/A	#N/A	#N/A
EE	V6	family	Pasteurellaceae	1	180	#N/A	#N/A	#N/A
EE	V6	family	Eggerthellaceae	1	180	#N/A	#N/A	#N/A
EE	V6	family	Selenomonadaceae	0	181	#N/A	#N/A	#N/A
EE	V6	family	Candidatus Borkfalkiaceae	0	181	#N/A	#N/A	#N/A
EE	V6	family	Lactobacillaceae	0	181	#N/A	#N/A	#N/A
EE	V6	family	Clostridiales Family XIII. Incertae Sedis	0	181	#N/A	#N/A	#N/A
EE	V6	family	Victivallaceae	0	181	#N/A	#N/A	#N/A
EE	V6	family	Atopobiaceae	1	180	#N/A	#N/A	#N/A
EE	V6	family	Oxalobacteraceae	0	181	#N/A	#N/A	#N/A
EE	V6	family	Micrococcaceae	2	179	#N/A	#N/A	#N/A
EE	V6	family	Blastocystidae	0	181	#N/A	#N/A	#N/A
EE	V6	family	Methanomassiliicoccaceae	0	181	#N/A	#N/A	#N/A
EE	V6	family	Elusimicrobiaceae	0	181	#N/A	#N/A	#N/A
EE	V6	family	Fusobacteriaceae	0	181	#N/A	#N/A	#N/A
EE	V6	family	Hafniaceae	0	181	#N/A	#N/A	#N/A
EE	V6	family	Staphylococcaceae	0	181	#N/A	#N/A	#N/A
EE	V6	family	Muribaculaceae	0	181	#N/A	#N/A	#N/A
EE	V6	family	Brachyspiraceae	0	181	#N/A	#N/A	#N/A
EE	V6	family	Porphyromonadaceae	0	181	#N/A	#N/A	#N/A
EE	V6	family	Actinomycetaceae	2	179	#N/A	#N/A	#N/A
EE	V6	family	Spirochaetaceae	0	181	#N/A	#N/A	#N/A
EE	V6	family	Comamonadaceae	0	181	#N/A	#N/A	#N/A
EE	V6	family	Moraxellaceae	1	180	#N/A	#N/A	#N/A
EE	V6	family	Aeromonadaceae	0	181	#N/A	#N/A	#N/A
EE	V6	family	Campylobacteraceae	0	181	#N/A	#N/A	#N/A
EE	V6	family	Methylobacteriaceae	0	181	#N/A	#N/A	#N/A
EE	V6	family	Caulobacteraceae	0	181	#N/A	#N/A	#N/A
EE	V6	family	Flavobacteriaceae	0	181	#N/A	#N/A	#N/A
EE	V6	family	Synergistaceae	0	181	#N/A	#N/A	#N/A
EE	V6	family	Corynebacteriaceae	0	181	#N/A	#N/A	#N/A
EE	V6	family	Propionibacteriaceae	0	181	#N/A	#N/A	#N/A
EE	V6	family	Carnobacteriaceae	0	181	#N/A	#N/A	#N/A
EE	V6	family	Bacillaceae	0	181	#N/A	#N/A	#N/A
EE	V6	family	Morganellaceae	0	181	#N/A	#N/A	#N/A
EE	V6	family	Mycobacteriaceae	0	181	#N/A	#N/A	#N/A
EE	V6	family	Neisseriaceae	1	180	#N/A	#N/A	#N/A
EE	V6	family	Erwiniaceae	0	181	#N/A	#N/A	#N/A
EE	V6	family	Pseudomonadaceae	0	181	#N/A	#N/A	#N/A
EE	V6	family	Yersiniaceae	0	181	#N/A	#N/A	#N/A
EE	V6	family	Shewanellaceae	0	181	#N/A	#N/A	#N/A
EE	V6	family	Sphingomonadaceae	0	181	#N/A	#N/A	#N/A
EE	V6	family	Xanthomonadaceae	0	181	#N/A	#N/A	#N/A
EE	V6	family	Promicromonosporaceae	1	180	#N/A	#N/A	#N/A
LE	V0	genus	Bacteroides	6	95	0.726316	0.00294043	0.0411661
LE	V0	genus	Escherichia	3	98	-0.761905	0.025061	0.143445
LE	V0	genus	Rothia	3	98	-0.734694	0.0307383	0.143445
LE	V0	genus	Bifidobacterium	9	92	0.384058	0.0580544	0.20319
LE	V0	genus	Veillonella	7	94	-0.306991	0.176849	0.315866
LE	V0	genus	Streptococcus	8	93	-0.28629	0.180495	0.315866
LE	V0	genus	Enterobacter	5	96	0.372917	0.161159	0.315866
LE	V0	genus	Blautia	3	98	0.489796	0.149784	0.315866
LE	V0	genus	Citrobacter	3	98	-0.397959	0.241904	0.338666
LE	V0	genus	Enterococcus	5	96	-0.325	0.222031	0.338666
LE	V0	genus	Lactobacillus	4	97	-0.206186	0.4861	0.567116
LE	V0	genus	Lachnoclostridium	4	97	0.21134	0.475265	0.567116
LE	V0	genus	Klebsiella	5	96	0.129167	0.627445	0.67571
LE	V0	genus	Clostridium	5	96	-0.00833333	0.975021	0.975021
LE	V0	genus	Fusicatenibacter	0	101	#N/A	#N/A	#N/A
LE	V0	genus	Parabacteroides	1	100	#N/A	#N/A	#N/A
LE	V0	genus	Alistipes	0	101	#N/A	#N/A	#N/A
LE	V0	genus	Faecalibacterium	0	101	#N/A	#N/A	#N/A
LE	V0	genus	Anaerostipes	0	101	#N/A	#N/A	#N/A
LE	V0	genus	Roseburia	0	101	#N/A	#N/A	#N/A
LE	V0	genus	Eubacterium	0	101	#N/A	#N/A	#N/A
LE	V0	genus	Ruminococcus	0	101	#N/A	#N/A	#N/A
LE	V0	genus	Subdoligranulum	0	101	#N/A	#N/A	#N/A
LE	V0	genus	Collinsella	1	100	#N/A	#N/A	#N/A
LE	V0	genus	Dorea	0	101	#N/A	#N/A	#N/A
LE	V0	genus	Barnesiella	0	101	#N/A	#N/A	#N/A
LE	V0	genus	Anaerobutyricum	0	101	#N/A	#N/A	#N/A
LE	V0	genus	Gemmiger	0	101	#N/A	#N/A	#N/A
LE	V0	genus	Odoribacter	0	101	#N/A	#N/A	#N/A
LE	V0	genus	Coprococcus	2	99	#N/A	#N/A	#N/A
LE	V0	genus	Lachnospira	0	101	#N/A	#N/A	#N/A
LE	V0	genus	Akkermansia	0	101	#N/A	#N/A	#N/A
LE	V0	genus	Prevotella	0	101	#N/A	#N/A	#N/A
LE	V0	genus	Agathobaculum	0	101	#N/A	#N/A	#N/A
LE	V0	genus	Sutterella	0	101	#N/A	#N/A	#N/A
LE	V0	genus	Phascolarctobacterium	0	101	#N/A	#N/A	#N/A
LE	V0	genus	Flavonifractor	2	99	#N/A	#N/A	#N/A
LE	V0	genus	Dialister	0	101	#N/A	#N/A	#N/A
LE	V0	genus	Paraprevotella	0	101	#N/A	#N/A	#N/A
LE	V0	genus	Bilophila	0	101	#N/A	#N/A	#N/A
LE	V0	genus	Parasutterella	0	101	#N/A	#N/A	#N/A
LE	V0	genus	Methanobrevibacter	0	101	#N/A	#N/A	#N/A
LE	V0	genus	Ruthenibacterium	1	100	#N/A	#N/A	#N/A
LE	V0	genus	Haemophilus	1	100	#N/A	#N/A	#N/A
LE	V0	genus	Adlercreutzia	0	101	#N/A	#N/A	#N/A
LE	V0	genus	Butyricicoccus	0	101	#N/A	#N/A	#N/A
LE	V0	genus	Butyrivibrio	0	101	#N/A	#N/A	#N/A
LE	V0	genus	Catenibacterium	0	101	#N/A	#N/A	#N/A
LE	V0	genus	Butyricimonas	0	101	#N/A	#N/A	#N/A
LE	V0	genus	Intestinibacter	1	100	#N/A	#N/A	#N/A
LE	V0	genus	Erysipelatoclostridium	2	99	#N/A	#N/A	#N/A
LE	V0	genus	Tidjanibacter	0	101	#N/A	#N/A	#N/A
LE	V0	genus	Eggerthella	1	100	#N/A	#N/A	#N/A
LE	V0	genus	Coprobacter	0	101	#N/A	#N/A	#N/A
LE	V0	genus	Romboutsia	1	100	#N/A	#N/A	#N/A
LE	V0	genus	Holdemanella	0	101	#N/A	#N/A	#N/A
LE	V0	genus	Duodenibacillus	0	101	#N/A	#N/A	#N/A
LE	V0	genus	Megamonas	0	101	#N/A	#N/A	#N/A
LE	V0	genus	Desulfovibrio	0	101	#N/A	#N/A	#N/A
LE	V0	genus	Acidaminococcus	0	101	#N/A	#N/A	#N/A
LE	V0	genus	Oscillibacter	0	101	#N/A	#N/A	#N/A
LE	V0	genus	Sellimonas	0	101	#N/A	#N/A	#N/A
LE	V0	genus	Monoglobus	0	101	#N/A	#N/A	#N/A
LE	V0	genus	Candidatus Borkfalkia	0	101	#N/A	#N/A	#N/A
LE	V0	genus	Mesosutterella	0	101	#N/A	#N/A	#N/A
LE	V0	genus	Intestinimonas	0	101	#N/A	#N/A	#N/A
LE	V0	genus	Coprobacillus	0	101	#N/A	#N/A	#N/A
LE	V0	genus	Ellagibacter	0	101	#N/A	#N/A	#N/A
LE	V0	genus	Hungatella	1	100	#N/A	#N/A	#N/A
LE	V0	genus	Prevotellamassilia	0	101	#N/A	#N/A	#N/A
LE	V0	genus	Eisenbergiella	0	101	#N/A	#N/A	#N/A
LE	V0	genus	Mitsuokella	0	101	#N/A	#N/A	#N/A
LE	V0	genus	Methanosphaera	0	101	#N/A	#N/A	#N/A
LE	V0	genus	Victivallis	0	101	#N/A	#N/A	#N/A
LE	V0	genus	Olsenella	0	101	#N/A	#N/A	#N/A
LE	V0	genus	Neglecta	0	101	#N/A	#N/A	#N/A
LE	V0	genus	Negativibacillus	0	101	#N/A	#N/A	#N/A
LE	V0	genus	Megasphaera	1	100	#N/A	#N/A	#N/A
LE	V0	genus	Allisonella	0	101	#N/A	#N/A	#N/A
LE	V0	genus	Parolsenella	0	101	#N/A	#N/A	#N/A
LE	V0	genus	Holdemania	0	101	#N/A	#N/A	#N/A
LE	V0	genus	Pseudoflavonifractor	0	101	#N/A	#N/A	#N/A
LE	V0	genus	Anaeromassilibacillus	0	101	#N/A	#N/A	#N/A
LE	V0	genus	Merdimonas	0	101	#N/A	#N/A	#N/A
LE	V0	genus	Oxalobacter	0	101	#N/A	#N/A	#N/A
LE	V0	genus	Senegalimassilia	0	101	#N/A	#N/A	#N/A
LE	V0	genus	Enorma	0	101	#N/A	#N/A	#N/A
LE	V0	genus	Frisingicoccus	0	101	#N/A	#N/A	#N/A
LE	V0	genus	Massilimicrobiota	0	101	#N/A	#N/A	#N/A
LE	V0	genus	Anaerotignum	0	101	#N/A	#N/A	#N/A
LE	V0	genus	Dakarella	0	101	#N/A	#N/A	#N/A
LE	V0	genus	Anaerotruncus	0	101	#N/A	#N/A	#N/A
LE	V0	genus	Turicibacter	0	101	#N/A	#N/A	#N/A
LE	V0	genus	Blastocystis	0	101	#N/A	#N/A	#N/A
LE	V0	genus	Mordavella	0	101	#N/A	#N/A	#N/A
LE	V0	genus	Phocea	0	101	#N/A	#N/A	#N/A
LE	V0	genus	Methanomassiliicoccus	0	101	#N/A	#N/A	#N/A
LE	V0	genus	Clostridioides	1	100	#N/A	#N/A	#N/A
LE	V0	genus	Fusobacterium	0	101	#N/A	#N/A	#N/A
LE	V0	genus	Raoultella	1	100	#N/A	#N/A	#N/A
LE	V0	genus	Faecalitalea	0	101	#N/A	#N/A	#N/A
LE	V0	genus	Mediterranea	0	101	#N/A	#N/A	#N/A
LE	V0	genus	Emergencia	0	101	#N/A	#N/A	#N/A
LE	V0	genus	Hafnia	0	101	#N/A	#N/A	#N/A
LE	V0	genus	Lactococcus	1	100	#N/A	#N/A	#N/A
LE	V0	genus	Staphylococcus	2	99	#N/A	#N/A	#N/A
LE	V0	genus	Muribaculum	0	101	#N/A	#N/A	#N/A
LE	V0	genus	Faecalicatena	0	101	#N/A	#N/A	#N/A
LE	V0	genus	Brachyspira	0	101	#N/A	#N/A	#N/A
LE	V0	genus	Porphyromonas	0	101	#N/A	#N/A	#N/A
LE	V0	genus	Culturomica	0	101	#N/A	#N/A	#N/A
LE	V0	genus	Acidovorax	0	101	#N/A	#N/A	#N/A
LE	V0	genus	Comamonas	0	101	#N/A	#N/A	#N/A
LE	V0	genus	Acinetobacter	0	101	#N/A	#N/A	#N/A
LE	V0	genus	Actinomyces	0	101	#N/A	#N/A	#N/A
LE	V0	genus	Aeromonas	0	101	#N/A	#N/A	#N/A
LE	V0	genus	Fenollaria	0	101	#N/A	#N/A	#N/A
LE	V0	genus	Arcobacter	0	101	#N/A	#N/A	#N/A
LE	V0	genus	Methylobacterium	0	101	#N/A	#N/A	#N/A
LE	V0	genus	Atopobium	1	100	#N/A	#N/A	#N/A
LE	V0	genus	Turicimonas	0	101	#N/A	#N/A	#N/A
LE	V0	genus	Caulobacter	0	101	#N/A	#N/A	#N/A
LE	V0	genus	Chryseobacterium	0	101	#N/A	#N/A	#N/A
LE	V0	genus	Cloacibacillus	0	101	#N/A	#N/A	#N/A
LE	V0	genus	Rubneribacter	0	101	#N/A	#N/A	#N/A
LE	V0	genus	Corynebacterium	0	101	#N/A	#N/A	#N/A
LE	V0	genus	Cutibacterium	1	100	#N/A	#N/A	#N/A
LE	V0	genus	Metakosakonia	1	100	#N/A	#N/A	#N/A
LE	V0	genus	Flavobacterium	0	101	#N/A	#N/A	#N/A
LE	V0	genus	Sanguibacteroides	0	101	#N/A	#N/A	#N/A
LE	V0	genus	Gardnerella	0	101	#N/A	#N/A	#N/A
LE	V0	genus	Granulicatella	0	101	#N/A	#N/A	#N/A
LE	V0	genus	Kosakonia	0	101	#N/A	#N/A	#N/A
LE	V0	genus	Lysinibacillus	0	101	#N/A	#N/A	#N/A
LE	V0	genus	Morganella	0	101	#N/A	#N/A	#N/A
LE	V0	genus	Mycobacteroides	0	101	#N/A	#N/A	#N/A
LE	V0	genus	Neisseria	1	100	#N/A	#N/A	#N/A
LE	V0	genus	Pantoea	0	101	#N/A	#N/A	#N/A
LE	V0	genus	Pseudomonas	0	101	#N/A	#N/A	#N/A
LE	V0	genus	Robinsoniella	0	101	#N/A	#N/A	#N/A
LE	V0	genus	Selenomonas	0	101	#N/A	#N/A	#N/A
LE	V0	genus	Serratia	0	101	#N/A	#N/A	#N/A
LE	V0	genus	Shewanella	0	101	#N/A	#N/A	#N/A
LE	V0	genus	Sphingomonas	0	101	#N/A	#N/A	#N/A
LE	V0	genus	Stenotrophomonas	0	101	#N/A	#N/A	#N/A
LE	V0	genus	Kluyvera	0	101	#N/A	#N/A	#N/A
LE	V0	genus	Atlantibacter	0	101	#N/A	#N/A	#N/A
LE	V0	genus	Terrisporobacter	0	101	#N/A	#N/A	#N/A
LE	V0	genus	Macrococcus	0	101	#N/A	#N/A	#N/A
LE	V0	genus	Anaerosporobacter	0	101	#N/A	#N/A	#N/A
LE	V0	genus	Schaalia	0	101	#N/A	#N/A	#N/A
LE	V0	genus	Isoptericola	1	100	#N/A	#N/A	#N/A
LE	V0	family	Bacteroidaceae	6	95	0.726316	0.00294043	0.0352852
LE	V0	family	Micrococcaceae	3	98	-0.734694	0.0307383	0.18443
LE	V0	family	Bifidobacteriaceae	9	92	0.384058	0.0580544	0.232217
LE	V0	family	Streptococcaceae	9	92	-0.274155	0.17608	0.528239
LE	V0	family	Enterococcaceae	5	96	-0.325	0.222031	0.532875
LE	V0	family	Veillonellaceae	8	93	-0.228495	0.285128	0.570255
LE	V0	family	Lactobacillaceae	4	97	-0.206186	0.4861	0.699061
LE	V0	family	Lachnospiraceae	10	91	0.123077	0.524296	0.699061
LE	V0	family	Peptostreptococcaceae	3	98	0.251701	0.459208	0.699061
LE	V0	family	Enterobacteriaceae	19	82	-0.0808729	0.584065	0.700878
LE	V0	family	Ruminococcaceae	3	98	-0.0612245	0.857123	0.935044
LE	V0	family	Clostridiaceae	8	93	-0.00268817	0.989967	0.989967
LE	V0	family	Tannerellaceae	1	100	#N/A	#N/A	#N/A
LE	V0	family	Rikenellaceae	0	101	#N/A	#N/A	#N/A
LE	V0	family	Eubacteriaceae	0	101	#N/A	#N/A	#N/A
LE	V0	family	Coriobacteriaceae	1	100	#N/A	#N/A	#N/A
LE	V0	family	Barnesiellaceae	0	101	#N/A	#N/A	#N/A
LE	V0	family	Odoribacteraceae	0	101	#N/A	#N/A	#N/A
LE	V0	family	Oscillospiraceae	0	101	#N/A	#N/A	#N/A
LE	V0	family	Akkermansiaceae	0	101	#N/A	#N/A	#N/A
LE	V0	family	Prevotellaceae	0	101	#N/A	#N/A	#N/A
LE	V0	family	Sutterellaceae	0	101	#N/A	#N/A	#N/A
LE	V0	family	Acidaminococcaceae	0	101	#N/A	#N/A	#N/A
LE	V0	family	Desulfovibrionaceae	0	101	#N/A	#N/A	#N/A
LE	V0	family	Erysipelotrichaceae	2	99	#N/A	#N/A	#N/A
LE	V0	family	Methanobacteriaceae	0	101	#N/A	#N/A	#N/A
LE	V0	family	Pasteurellaceae	1	100	#N/A	#N/A	#N/A
LE	V0	family	Eggerthellaceae	1	100	#N/A	#N/A	#N/A
LE	V0	family	Selenomonadaceae	0	101	#N/A	#N/A	#N/A
LE	V0	family	Candidatus Borkfalkiaceae	0	101	#N/A	#N/A	#N/A
LE	V0	family	Clostridiales Family XIII. Incertae Sedis	0	101	#N/A	#N/A	#N/A
LE	V0	family	Victivallaceae	0	101	#N/A	#N/A	#N/A
LE	V0	family	Atopobiaceae	1	100	#N/A	#N/A	#N/A
LE	V0	family	Oxalobacteraceae	0	101	#N/A	#N/A	#N/A
LE	V0	family	Blastocystidae	0	101	#N/A	#N/A	#N/A
LE	V0	family	Methanomassiliicoccaceae	0	101	#N/A	#N/A	#N/A
LE	V0	family	Elusimicrobiaceae	0	101	#N/A	#N/A	#N/A
LE	V0	family	Fusobacteriaceae	0	101	#N/A	#N/A	#N/A
LE	V0	family	Hafniaceae	0	101	#N/A	#N/A	#N/A
LE	V0	family	Staphylococcaceae	2	99	#N/A	#N/A	#N/A
LE	V0	family	Muribaculaceae	0	101	#N/A	#N/A	#N/A
LE	V0	family	Brachyspiraceae	0	101	#N/A	#N/A	#N/A
LE	V0	family	Porphyromonadaceae	0	101	#N/A	#N/A	#N/A
LE	V0	family	Actinomycetaceae	1	100	#N/A	#N/A	#N/A
LE	V0	family	Spirochaetaceae	0	101	#N/A	#N/A	#N/A
LE	V0	family	Comamonadaceae	0	101	#N/A	#N/A	#N/A
LE	V0	family	Moraxellaceae	0	101	#N/A	#N/A	#N/A
LE	V0	family	Aeromonadaceae	0	101	#N/A	#N/A	#N/A
LE	V0	family	Campylobacteraceae	0	101	#N/A	#N/A	#N/A
LE	V0	family	Methylobacteriaceae	0	101	#N/A	#N/A	#N/A
LE	V0	family	Caulobacteraceae	0	101	#N/A	#N/A	#N/A
LE	V0	family	Flavobacteriaceae	0	101	#N/A	#N/A	#N/A
LE	V0	family	Synergistaceae	0	101	#N/A	#N/A	#N/A
LE	V0	family	Corynebacteriaceae	0	101	#N/A	#N/A	#N/A
LE	V0	family	Propionibacteriaceae	1	100	#N/A	#N/A	#N/A
LE	V0	family	Carnobacteriaceae	0	101	#N/A	#N/A	#N/A
LE	V0	family	Bacillaceae	0	101	#N/A	#N/A	#N/A
LE	V0	family	Morganellaceae	0	101	#N/A	#N/A	#N/A
LE	V0	family	Mycobacteriaceae	0	101	#N/A	#N/A	#N/A
LE	V0	family	Neisseriaceae	1	100	#N/A	#N/A	#N/A
LE	V0	family	Erwiniaceae	0	101	#N/A	#N/A	#N/A
LE	V0	family	Pseudomonadaceae	0	101	#N/A	#N/A	#N/A
LE	V0	family	Yersiniaceae	0	101	#N/A	#N/A	#N/A
LE	V0	family	Shewanellaceae	0	101	#N/A	#N/A	#N/A
LE	V0	family	Sphingomonadaceae	0	101	#N/A	#N/A	#N/A
LE	V0	family	Xanthomonadaceae	0	101	#N/A	#N/A	#N/A
LE	V0	family	Promicromonosporaceae	1	100	#N/A	#N/A	#N/A
LE	V1	genus	Bacteroides	7	111	0.655084	0.00373797	0.0485937
LE	V1	genus	Lachnoclostridium	7	111	0.519949	0.0213721	0.138919
LE	V1	genus	Blautia	3	115	0.675362	0.0463872	0.201011
LE	V1	genus	Enterobacter	5	113	0.470796	0.0755811	0.245639
LE	V1	genus	Citrobacter	3	115	-0.498551	0.141459	0.306494
LE	V1	genus	Bifidobacterium	8	110	0.328409	0.121883	0.306494
LE	V1	genus	Clostridium	9	109	-0.216106	0.282481	0.524608
LE	V1	genus	Veillonella	7	111	-0.21879	0.332851	0.540882
LE	V1	genus	Enterococcus	6	112	-0.205357	0.397949	0.574816
LE	V1	genus	Klebsiella	5	113	0.136283	0.606992	0.789089
LE	V1	genus	Streptococcus	8	110	-0.0795455	0.707894	0.836602
LE	V1	genus	Rothia	4	114	-0.0767544	0.794668	0.83744
LE	V1	genus	Escherichia	3	115	0.0695652	0.83744	0.83744
LE	V1	genus	Fusicatenibacter	1	117	#N/A	#N/A	#N/A
LE	V1	genus	Parabacteroides	1	117	#N/A	#N/A	#N/A
LE	V1	genus	Alistipes	0	118	#N/A	#N/A	#N/A
LE	V1	genus	Faecalibacterium	0	118	#N/A	#N/A	#N/A
LE	V1	genus	Anaerostipes	1	117	#N/A	#N/A	#N/A
LE	V1	genus	Roseburia	0	118	#N/A	#N/A	#N/A
LE	V1	genus	Eubacterium	0	118	#N/A	#N/A	#N/A
LE	V1	genus	Ruminococcus	0	118	#N/A	#N/A	#N/A
LE	V1	genus	Subdoligranulum	0	118	#N/A	#N/A	#N/A
LE	V1	genus	Collinsella	1	117	#N/A	#N/A	#N/A
LE	V1	genus	Dorea	0	118	#N/A	#N/A	#N/A
LE	V1	genus	Barnesiella	0	118	#N/A	#N/A	#N/A
LE	V1	genus	Anaerobutyricum	0	118	#N/A	#N/A	#N/A
LE	V1	genus	Gemmiger	0	118	#N/A	#N/A	#N/A
LE	V1	genus	Odoribacter	0	118	#N/A	#N/A	#N/A
[truncated: 630 more rows]

## Sheet: Supplementary Table S5
Metabolite name	HMDB	KEGG	Abbreviation	Metabolite class	SUPER_PATHWAY	SUB_PATHWAY	SUB_FAMILY
tauro_α_muricholic acid	-	-	TαMCA	BA	Lipid	Primary Bile Acid Metabolism	Conjugated bile acid
taurohyocholic acid	-	-	THCA	BA	Lipid	Secondary Bile Acid Metabolism	Conjugated bile acid
taurocholic acid	HMDB0000036	C05122	TCA	BA	Lipid	Primary Bile Acid Metabolism	Conjugated bile acid
tauroursodeoxycholic acid	HMDB0000874	-	TUDCA	BA	Lipid	Secondary Bile Acid Metabolism	Conjugated bile acid
taurohyodeoxycholic acid	-	-	THDCA	BA	Lipid	Secondary Bile Acid Metabolism	Conjugated bile acid
taurochenodeoxycholic acid	HMDB0000951	C05465	TCDCA	BA	Lipid	Primary Bile Acid Metabolism	Conjugated bile acid
ursocholic acid	HMDB0000917	C17644	UCA	BA	Lipid	Secondary Bile Acid Metabolism	Unconjugated bile acid
taurodeoxycholic acid	HMDB0000896	C05463	TDCA	BA	Lipid	Secondary Bile Acid Metabolism	Conjugated bile acid
ω_muricholic acid	-	-	ωMCA	BA	Lipid	Secondary Bile Acid Metabolism	Unconjugated bile acid
α_muricholic acid	-	-	αMCA	BA	Lipid	Primary Bile Acid Metabolism	Unconjugated bile acid
β_muricholic acid	HMDB0000415	C17726	βMCA	BA	Lipid	Primary Bile Acid Metabolism	Unconjugated bile acid
3β_cholic acid	HMDB0000419	-	βCA	BA	Lipid	Secondary Bile Acid Metabolism	Unconjugated bile acid
glycohyocholic acid	-	-	GHCA	BA	Lipid	Secondary Bile Acid Metabolism	Conjugated bile acid
3_dehydrocholic acid\3_oxocholic acid	-	-	3_DHCA	BA	Lipid	Secondary Bile Acid Metabolism	Unconjugated bile acid
glycoursodeoxycholic acid	HMDB0000708	-	GUDCA	BA	Lipid	Secondary Bile Acid Metabolism	Conjugated bile acid
norcholic acid	-	-	NorCA	BA	Lipid	Secondary Bile Acid Metabolism	Unconjugated bile acid
murocholic acid	HMDB0000811	C15515	muroCA	BA	Lipid	Secondary Bile Acid Metabolism	Unconjugated bile acid
3β_ursodeoxycholic acid	-	-	βUDCA	BA	Lipid	Secondary Bile Acid Metabolism	Unconjugated bile acid
γ_muricholic acid\hyocholic acid	HMDB0000760	-	HCA	BA	Lipid	Secondary Bile Acid Metabolism	Unconjugated bile acid
glycocholic acid	HMDB0000138	C01921	GCA	BA	Lipid	Primary Bile Acid Metabolism	Conjugated bile acid
allocholic acid	HMDB0000505	C00695	ACA	BA	Lipid	Secondary Bile Acid Metabolism	Unconjugated bile acid
cholic acid	HMDB0000619	C00695	CA	BA	Lipid	Primary Bile Acid Metabolism	Unconjugated bile acid
6,7_diketolithocholic acid	-	-	6,7_diketoLCA	BA	Lipid	Secondary Bile Acid Metabolism	Unconjugated bile acid
ursodeoxycholic acid	HMDB0000946	C07880	UDCA	BA	Lipid	Secondary Bile Acid Metabolism	Unconjugated bile acid
α_hyodeoxycholic acid	-	-	HDCA	BA	Lipid	Secondary Bile Acid Metabolism	Unconjugated bile acid
6_ketolithocholic acid	-	-	6_ketoLCA	BA	Lipid	Secondary Bile Acid Metabolism	Unconjugated bile acid
nutriacholic acid / 7_ketolithocholic acid	HMDB0000467	-	7_ketoLCA	BA	Lipid	Secondary Bile Acid Metabolism	Unconjugated bile acid
taurolithocholic acid	HMDB0000722	C02592	TLCA	BA	Lipid	Secondary Bile Acid Metabolism	Conjugated bile acid
lithocholic acid_3_sulfate	-	-	LCA_3S	BA	Lipid	Secondary Bile Acid Metabolism	Unconjugated bile acid
glycochenodeoxycholic acid	HMDB0000637	C05466	GCDCA	BA	Lipid	Primary Bile Acid Metabolism	Conjugated bile acid
glycodeoxycholic acid	HMDB0000631	C05464	GDCA	BA	Lipid	Secondary Bile Acid Metabolism	Conjugated bile acid
dehydrocholic acid	-	-	DHCA	BA	Lipid	Secondary Bile Acid Metabolism	Unconjugated bile acid
chenodeoxycholic acid	HMDB0000518	C02528	CDCA	BA	Lipid	Primary Bile Acid Metabolism	Unconjugated bile acid
12_ketolithocholic acid\12_ketodeoxycholic acid	HMDB0000328	-	12_ketoLCA	BA	Lipid	Secondary Bile Acid Metabolism	Unconjugated bile acid
dehydrolithocholic acid	-	-	dehydroLCA	BA	Lipid	Secondary Bile Acid Metabolism	Unconjugated bile acid
allolithocholic acid	HMDB0000381	-	alloLCA	BA	Lipid	Secondary Bile Acid Metabolism	Unconjugated bile acid
isolithocholic acid	HMDB0000717	C17658	isoLCA	BA	Lipid	Secondary Bile Acid Metabolism	Unconjugated bile acid
lithocholic acid	HMDB0000761	C03990	LCA	BA	Lipid	Secondary Bile Acid Metabolism	Unconjugated bile acid
deoxycholic acid	HMDB0000626	C04483	DCA	BA	Lipid	Secondary Bile Acid Metabolism	Unconjugated bile acid
isodeoxycholic acid	HMDB0002536	C17661	isoDCA	BA	Lipid	Secondary Bile Acid Metabolism	Unconjugated bile acid
chenodeoxycholic acid_3_β_D_glucuronide	-	-	CDCA_3G	BA	Lipid	Primary Bile Acid Metabolism	Unconjugated bile acid
7_dehydrocholic acid	-	-	7_DHCA	BA	Lipid	Secondary Bile Acid Metabolism	Unconjugated bile acid
lithocholic acid 3 sulfate	-	-	LCA_3S	BA	Lipid	Secondary Bile Acid Metabolism	Unconjugated bile acid
3_Hydroxybutyric acid	HMDB0000357	C01089		FFA	Lipid	Ketone Bodies
Acetic acid	HMDB0000042	C00033	C2:0	FFA	Lipid	Short Chain Fatty Acid
Alpha_Hydroxyisobutyric acid	HMDB0000729	-		FFA	Lipid
Propionic acid	HMDB0000237	C00163	C3:0	FFA	Lipid	Short Chain Fatty Acid
3_Hydroxyisovaleric acid	HMDB0000754	C20827		FFA	Amino Acid	Leucine, Isoleucine and Valine Metabolism
2_Hydroxybutyric acid	HMDB0000008	C05984		FFA	Lipid	Hydroxy fatty acids
3_(3_Hydroxyphenyl)_3_hydroxypropanoic acid	HMDB0002643	-		AA others	Amino Acid	Phenylalanine Metabolism
3_Hydroxyphenylacetic acid	HMDB0000440	C05593		AA others	Amino Acid	Tyrosine Metabolism
Isobutyric acid	HMDB0001873	C02632		FFA	Lipid	Short chain fatty acid
Butyric acid	HMDB0000039	C00246	C4:0	FFA	Lipid	Short Chain Fatty Acid
Citramalic acid	HMDB0000426	C00815		FFA	Energy	TCA Cycle
Succinic acid	HMDB0000254	C00042		FFA	Energy	TCA Cycle
Pimelic acid	HMDB0000857	C02656		FFA
Isovaleric acid	HMDB0000718	C08262		FFA	Amino Acid	Leucine, Isoleucine and Valine Metabolism
Valeric acid	HMDB0000892	C00803	C5:0	FFA	Lipid	Short Chain Fatty Acid
Suberic acid	HMDB0000893	C08278		FFA	Lipid	Fatty Acid, Dicarboxylate
Hexanoic acid	HMDB0000535	C01585	C6:0	FFA	Lipid	Medium Chain Fatty Acid
Heptanoic acid	HMDB0000666	C17714	C7:0	FFA	Lipid	Medium Chain Fatty Acid
Caprylic acid	HMDB0000482	C06423	C8:0	FFA	Lipid	Medium Chain Fatty Acid
Decanoic acid	HMDB0000511	C01571	C10:0	FFA	Lipid	Medium Chain Fatty Acid
Pelargonic acid	HMDB0000847	C01601	C9:0	FFA	Lipid	Medium Chain Fatty Acid
Undecanoic acid	HMDB0000947	C17715	C11:0	FFA	Lipid	Medium Chain Fatty Acid
Dodecanoic acid	HMDB0000638	C02679	C12:0	FFA	Lipid	Medium Chain Fatty Acid
Pentadecanoic acid	HMDB0000826	C16537	C15:0	FFA	Lipid	Fatty acid
Myristic acid	HMDB0000806	C06424	C14:0	FFA	Lipid	Fatty acid
Docosahexaenoic acid	HMDB0002183	C06429	C22:6(cis_4,7,10,13,16,19)	FFA	Lipid	Fatty acid
Palmitoleic acid	HMDB0003229	C08362	C16:1(cis_9)	FFA	Lipid	Fatty acid
Arachidonic acid	HMDB0001043	C00219	C20:4(cis_5,8,11,14)	FFA	Lipid	Fatty acid
Linoleic acid	HMDB0000673	C01595	C18:2(cis_9,12)	FFA	Lipid	Fatty acid
Hexadecanoic acid	HMDB0000220	C00249	C16:0	FFA	Lipid	Fatty acid
Heptadecanoic acid	HMDB0002259	-	C17:0	FFA	Lipid	Fatty acid
Stearic acid	HMDB0000827	C01530	C18:0	FFA	Lipid	Fatty acid
Oleic acid	HMDB0000207	C00712	C18:1(cis_9)	FFA	Lipid	Fatty acid
Docosanoic acid	HMDB0000944	C08281	C22:0	FFA	Lipid	Fatty acid
Tetracosanoic acid	HMDB0002003	C08320	C24:0	FFA	Lipid	Fatty acid
Eicosanoic acid	HMDB0002212	C06425	C21:0	FFA	Lipid	Fatty acid
12,13_DiHOME	HMDB0004705	C14829		FFA	Lipid	Eicosanoid
L_Histidine	HMDB0000177	C00135		AA others	Amino Acid	Histidine Metabolism
L_Lysine	HMDB0000182	C00047		AA others	Amino Acid	Lysine Metabolism
L_Serine	HMDB0000187	C00065		AA others	Amino Acid	Glycine, Serine and Threonine Metabolism
Ornithine	HMDB0000214	C00077		AA others	Amino Acid	Arginine and proline metabolism
Beta_Alanine	HMDB0000056	C00099		AA others	Nucleotide	Pyrimidine Metabolism, Uracil containing
L_Alanine	HMDB0000161	C00041		AA others	Amino Acid	Alanine and Aspartate Metabolism
Gamma_Aminobutyric acid	HMDB0000112	C00334		AA others	Amino Acid	Glutamate Metabolism
L_Lactic acid	HMDB0000190	C00256		AA others	Carbohydrate	Glycolysis, Gluconeogenesis, and Pyruvate Metabolism
L_Tyrosine	HMDB0000158	C00082		AA others	Amino Acid	Tyrosine Metabolism
L_Asparagine	HMDB0000168	C00152		AA others	Amino Acid	Alanine and Aspartate Metabolism
Nicotinic acid	HMDB0001488	C00253		AA others	Cofactors and Vitamins	Nicotinate and Nicotinamide Metabolism
L_Aspartic acid	HMDB0000191	C00049		AA others	Amino Acid	Alanine and Aspartate Metabolism
L_Phenylalanine	HMDB0000159	C00079		AA others	Amino Acid	Phenylalanine Metabolism
m_Hydroxyhippuric	HMDB0006116	NA		AA others	Xenobiotics	Benzoate Metabolism
4_Hydroxybenzoic acid	HMDB0000500	C00156		AA others	Xenobiotics	Benzoate Metabolism
Hippuric acid	HMDB0000714	C01586		AA others	Xenobiotics	Benzoate Metabolism
D_2_Hydroxyglutaric acid	HMDB0000606	C01087		AA others	Lipid
L_Malic acid	HMDB0000744	C03668		AA others	Energy	TCA Cycle
Aminoadipic acid	HMDB0000510	C00956		AA others	Amino Acid	Aromatic metabolism
Ortho_Hydroxyphenylacetic acid	HMDB0000669	C05852		AA others	Amino Acid	Phenylalanine Metabolism
4_Hydroxycinnamic acid	HMDB0002035	C00811		AA others	Amino Acid	Tyrosine Metabolism
Ethylmethylacetic acid	HMDB0002176	C18319		AA others	Amino Acid
Salicyluric acid	HMDB0000840	C07588		AA others	Xenobiotics	Benzoate Metabolism
Glutaric acid	HMDB0000661	C00489		AA others	Lipid	Fatty Acid, Dicarboxylate
Fumaric acid	HMDB0000134	C00122		AA others	Energy	TCA Cycle
Adipic acid	HMDB0000448	C06104		AA others	Amino Acid	Aromatic metabolism
Indoleacetic acid	HMDB0000197	C00954		AA others	Amino Acid	Tryptophan Metabolism
Phenylacetic acid	HMDB0000209	C07086		AA others	Amino Acid	Phenylalanine Metabolism
N_acetyltryptophan	HMDB0013713	-		AA others	Amino Acid	Tryptophan Metabolism
Hydrocinnamic acid	HMDB0000764	C05629		AA others	Xenobiotics	Benzoate Metabolism
4_Hydroxyphenylpyruvic acid	HMDB0000707	C01179		AA others	Amino Acid	Tyrosine Metabolism
Glycine	HMDB0000123	C00037		AA others	Amino Acid	Glycine, Serine and Threonine Metabolism
L_Glutamine	HMDB0000641	C00064		AA others	Amino Acid	Glutamate Metabolism
Glyceric acid	HMDB0000139	C00258		AA others	Carbohydrate	Glycolysis, Gluconeogenesis, and Pyruvate Metabolism
L_Proline	HMDB0000162	C00148		AA others	Amino Acid	Urea cycle; Arginine and Proline Metabolism
3_Aminoisobutanoic acid	HMDB0003911	C05145		AA others	Amino Acid
Glycolic acid	HMDB0000115	C03547		AA others	Energy	TCA Cycle
p_Cresol sulfate	HMDB0011635	-		AA others	Xenobiotics	Benzoate Metabolism
Pyroglutamic acid	HMDB0000267	C01879		AA others	Amino Acid	Glutathione Metabolism
L_Valine	HMDB0000883	C00183		AA others	Amino Acid	Leucine, Isoleucine and Valine Metabolism
L_Methionine	HMDB0000696	C00073		AA others	Amino Acid	Methionine, Cysteine, SAM and Taurine Metabolism
L_Isoleucine	HMDB0000172	C00407		AA others	Amino Acid	Leucine, Isoleucine and Valine Metabolism
L_Tryptophan	HMDB0000929	C00078		AA others	Amino Acid	Tryptophan Metabolism
Vanillic acid	HMDB0000484	C06672		AA others	Amino Acid	Aromatic metabolism
Malonic acid	HMDB0000691	C04025		AA others	Lipid	Fatty Acid Synthesis
cis_Aconitic acid	HMDB0000072	C00417		AA others	Energy	TCA Cycle
Citraconic acid	HMDB0000634	C02226		AA others	Energy	TCA Cycle
Oxalic acid	HMDB0002329	C00209		AA others	Energy	TCA Cycle
Isocitric acid	HMDB0000193	C00311		AA others	Energy	TCA Cycle
Citric acid	HMDB0000094	C00158		AA others	Energy	TCA Cycle
Oxoglutaric acid	HMDB0000208	C00026		AA others	Energy	TCA Cycle
Pyruvate	HMDB0000243	C00022		AA others	Carbohydrate	Glycolysis, Gluconeogenesis, and Pyruvate Metabolism
Fucose	HMDB0012327	C02781		HMO	Carbohydrate	Pentose Metabolism
Lacto_N_neotetraose	HMDB0006566	C06371		HMO	Carbohydrate	Disaccharides and Oligosaccharides
Lactose	HMDB0041627	C01970		HMO	Carbohydrate	Disaccharides and Oligosaccharides
6_Sialyllactose	HMDB0006569	NA		HMO	Carbohydrate	Disaccharides and Oligosaccharides
2_fucosyllactose	HMDB0002098	-		HMO	Carbohydrate	Disaccharides and Oligosaccharides
NA - Not Applicable

## Sheet: Supplementary Table S6
	PLS regression age & treatment	n		PC1 (Age)	PC2 (treatment)		* CP significant according to rule 1 in SIMCA -P
PLS regression age & treatment	all samples at V1, V3, V6	216	R2Y	0.41	0.05
			Q2Y	0.4	-0.07
	all samples at V3, V6	152	R2Y	0.41	0.07
			Q2Y	0.4	-0.02
	EE at V1, V3, V6	97	R2Y	0.43	0.1
			Q2Y	0.41	0.06
	EE at V3, V6	70	R2Y	0.44	0.16
			Q2Y	0.42	0.15*
	LE at V1, V3, V6	119	R2Y	0.4	0.11
			Q2Y	0.38	0.06
	LE at V3, V6	82	R2Y	0.4	0.14
			Q2Y	0.37	0.11*
				PC1 (EE vs LE)	OPC
OPLS-DA EE vs LE	all samples at V1, V3, V6	216	R2Y	1	-
			Q2Y	0.15*	-
	all samples at V3, V6	152	R2Y	1	-
			Q2Y	0.20*	-

## Sheet: Supplementary Table S7
	PLS model at V3&V6		V3		V6
Metabolites	correlation with treatment	VIP score	FC T/C	p value	FC T/C	p value
Suberic acid	0.586628	1.13	1.42	0.101	1.48	0.049
Decanoic acid	0.59	1.14	1.9	0.0398	1.95	0.1293
Palmitoleic acid	0.53	1.21	0.89	0.6845	1.96	0.0015
Caprylic acid	0.51	1.02	1.38	0.06307	1.67	0.058
Ethylmethylacetic acid	0.487336	1.05	2.61	0.0048	3.281	0.011
Oleic.acid	0.382742	1.11	1.02	0.950924	1.27	0.037
Heptanoic.acid	0.323684	1.15	1.34133	0.09899	1.38235	0.03
Hexadecanoic acid	0.201961	1.37	0.911	0.343228	1.385	0.069
glycohyocholic acid	-0.20163	1.1	0.026	0.00774	1	0.633
Stearic acid	-0.349235	1.84453	0.89663	0.796027	1.086	0.061

## Sheet: Supplementary Table S8
Visit	KO	Name	Category	Treatment_Cliff's Delta	Treatment_Lower CI	Treatment_Upper CI	Treatment_P	Treatment_FDR	N Control	N Test	Median abu (%), Control	Mean abu (%), Control	Prevalence, Control	Median abu (%), Test	Mean abu (%), Test	Prevalence, Test	FCT_Tau	FCT_Kendall_P	FCT_Kendall_FDR
V3	K00263	Leucine dehydrogenase	BCAA metabolism	0.0181818	-0.0986998	0.134569	1	1	25	33	0	7.17077e-06	1/25	0	1.12944e-06	2/33	0.0785093	0.530331	0.751303
V3	K00826	Branched chain amino acid amino transferase	BCAA metabolism	-0.139394	-0.420578	0.166222	0.373642	0.556969	25	33	0.0319499	0.0315275	25/25	0.0299354	0.0316741	33/33	-0.0364705	0.723565	0.878615
V3	K00166	Branched chain keto acid dehydrogenase	BCAA metabolism	0.132121	-0.168646	0.41038	0.393155	0.556969	25	33	2.52469e-05	0.000124142	16/25	3.17089e-05	0.000202249	25/33	-0.177661	0.0894301	0.304062
V3	K09699	Branched chain keto acid dehydrogenase	BCAA metabolism	0.132121	-0.167614	0.409497	0.393155	0.556969	25	33	1.98307e-05	0.000165941	17/25	3.9265e-05	0.000257706	24/33	-0.132126	0.207212	0.440326
V3	K00815	Tyrosine aminotransferase / aromatic-amino-acid transaminase	Aromatic amino acid metabolism	-0.350303	-0.582664	-0.0650006	0.0116004	0.0986033	25	33	1.04762e-05	0.00130151	15/25	0	0.000165878	10/33	0.362333	0.0010829	0.0184093
V3	K00817	Histidinol-phosphate aminotransferase	Aromatic amino acid metabolism	-0.0787879	-0.351335	0.20607	0.617961	0.750381	25	33	0.0353036	0.0369125	25/25	0.0331655	0.0355762	33/33	-0.000715107	1	1
V3	K00276	Primary-amine oxidase	Aromatic amino acid metabolism	0.208485	-0.100934	0.481129	0.179341	0.381099	25	33	0.000166594	0.000979883	22/25	0.000543576	0.00168214	30/33	-0.0445392	0.665917	0.870814
V3	K00129	Aldehyde dehydrogenase (NAD(P)+)	Aromatic amino acid metabolism	0.089697	-0.146812	0.316505	0.46007	0.60163	25	33	0	1.79757e-05	6/25	0	0.00035526	10/33	0.0888471	0.444769	0.68737
V3	K00146	Phenylacetaldehyde dehydrogenase	Aromatic amino acid metabolism	0.237576	-0.0732832	0.506359	0.125423	0.304599	25	33	0.000176394	0.000798363	24/25	0.000575766	0.0017016	32/33	-0.0107299	0.921109	0.978678
V3	K00274	Monoamine oxidase	Aromatic amino acid metabolism	0.139394	-0.128049	0.387938	0.37361	0.556969	25	33	0.000160724	0.00026485	25/25	0.000260859	0.000658499	30/33	0.0114521	0.91549	0.978678
V3	K01593	Aromatic-L-amino-acid/L-tryptophan decarboxylase	Aromatic amino acid metabolism	-0.358788	-0.606483	-0.0476124	0.0194987	0.110493	25	33	0.00460333	0.00539254	24/25	0.00188383	0.00389131	30/33	0.181251	0.0745965	0.304062
V3	K18427	4-Hydroxyphenylacetate decarboxylase	Aromatic amino acid metabolism	-0.252121	-0.488276	0.018439	0.0546065	0.185662	25	33	0	0.000196195	12/25	0	8.2907e-05	8/33	0.109422	0.336894	0.57272
V3	K18428	4-Hydroxyphenylacetate decarboxylase	Aromatic amino acid metabolism	-0.449697	-0.670862	-0.15507	0.00210316	0.0357537	25	33	3.91987e-05	8.13851e-05	20/25	0	5.61358e-05	13/33	0.114611	0.288	0.544
V3	K10797	2-enoate reductase	Aromatic amino acid metabolism	-0.304242	-0.542235	-0.021057	0.0491459	0.185662	25	33	0.0159042	0.0212859	25/25	0.0107534	0.0145673	32/33	0.150888	0.137403	0.350595
V3	K00457	4-hydroxyphenylpyruvate dioxygenase	Aromatic amino acid metabolism	0.0690909	-0.227544	0.353992	0.662596	0.750942	25	33	0.000689737	0.00145927	25/25	0.00102571	0.00213235	32/33	0.216677	0.0326521	0.212778
V3	K01075	4-hydroxybenzoyl-CoA thioesterase	Aromatic amino acid metabolism	-0.178182	-0.384099	0.0446208	0.096348	0.272986	25	33	0	7.59684e-05	7/25	0	3.56418e-06	4/33	0.172623	0.144363	0.350595
V3	K01442	Choloylglycine hydrolase	Bile acid metabolism	-0.0593939	-0.339941	0.23086	0.708443	0.752721	25	33	0.0235346	0.0255172	25/25	0.0239317	0.0231947	33/33	0.210957	0.037549	0.212778
V6	K00263	Leucine dehydrogenase	BCAA metabolism	-0.115385	-0.363592	0.14812	0.388647	0.599217	24	26	0	7.74532e-05	8/24	0	7.03733e-05	6/26	-0.198945	0.119625	0.290518
V6	K00826	Branched chain amino acid amino transferase	BCAA metabolism	0.0352564	-0.277893	0.341633	0.839868	0.89236	24	26	0.0298699	0.0305544	24/24	0.031122	0.0309299	26/26	0.26617	0.0176888	0.079172
V6	K00166	Branched chain keto acid dehydrogenase	BCAA metabolism	0.0352564	-0.216326	0.282448	0.792535	0.89236	24	26	0	1.34821e-05	6/24	0	4.91592e-05	7/26	0.34608	0.00689328	0.079172
V6	K09699	Branched chain keto acid dehydrogenase	BCAA metabolism	-0.0112179	-0.238467	0.217195	0.918994	0.918994	24	26	0	1.05041e-05	5/24	0	4.1503e-05	5/26	0.204857	0.116554	0.290518
V6	K00815	Tyrosine aminotransferase / aromatic-amino-acid transaminase	Aromatic amino acid metabolism	-0.344551	-0.598782	-0.0272422	0.0264644	0.224947	24	26	0.000118158	0.000657654	15/24	0	0.000125515	11/26	0.282861	0.0186287	0.079172
V6	K00817	Histidinol-phosphate aminotransferase	Aromatic amino acid metabolism	0.0352564	-0.269003	0.333117	0.839868	0.89236	24	26	0.0343855	0.0355376	24/24	0.03444	0.0356128	26/26	0.00303616	0.985553	0.985553
V6	K00276	Primary-amine oxidase	Aromatic amino acid metabolism	0.179487	-0.149135	0.472405	0.28319	0.599217	24	26	6.65787e-05	0.00033905	19/24	0.000152265	0.000413987	24/26	-0.0561462	0.624429	0.854561
V6	K00129	Aldehyde dehydrogenase (NAD(P)+)	Aromatic amino acid metabolism	-0.0929487	-0.3161	0.139948	0.422977	0.599217	24	26	0	5.84512e-05	6/24	0	1.88431e-05	4/26	0.0100749	0.948292	0.985553
V6	K00146	Phenylacetaldehyde dehydrogenase	Aromatic amino acid metabolism	0.0833333	-0.243552	0.393217	0.61924	0.809775	24	26	8.96207e-05	0.000324492	20/24	0.0001426	0.000395388	22/26	-0.051191	0.656639	0.854561
V6	K00274	Monoamine oxidase	Aromatic amino acid metabolism	0.147436	-0.178243	0.444002	0.380196	0.599217	24	26	0.000279331	0.000369687	23/24	0.000330176	0.000747686	26/26	0.0435182	0.703756	0.854561
V6	K01593	Aromatic-L-amino-acid/L-tryptophan decarboxylase	Aromatic amino acid metabolism	0.174679	-0.156364	0.470441	0.293924	0.599217	24	26	0.000552318	0.00121462	19/24	0.000837348	0.00129792	23/26	-0.110573	0.331663	0.626475
V6	K18427	4-Hydroxyphenylacetate decarboxylase	Aromatic amino acid metabolism	-0.407051	-0.655975	-0.0782673	0.0119474	0.203105	24	26	0.000246452	0.000319953	21/24	2.37198e-05	0.000241724	14/26	0.0179933	0.883229	0.985553
V6	K18428	4-Hydroxyphenylacetate decarboxylase	Aromatic amino acid metabolism	-0.272436	-0.545507	0.0529266	0.0920563	0.391239	24	26	2.21756e-05	9.49525e-05	18/24	7.57668e-06	5.0825e-05	14/26	-0.125496	0.286161	0.608092
V6	K10797	2-enoate reductase	Aromatic amino acid metabolism	0.176282	-0.1531	0.470412	0.292713	0.599217	24	26	0.00630233	0.00747784	24/24	0.00811308	0.00901255	26/26	-0.18723	0.0957372	0.290518
V6	K00457	4-hydroxyphenylpyruvate dioxygenase	Aromatic amino acid metabolism	0.304487	-0.0262268	0.575126	0.066185	0.375048	24	26	0.00131253	0.00196002	24/24	0.00183348	0.00271115	26/26	0.0961449	0.394743	0.671063
V6	K01075	4-hydroxybenzoyl-CoA thioesterase	Aromatic amino acid metabolism	0.129808	-0.131267	0.374045	0.327741	0.599217	24	26	0	1.42841e-05	5/24	0	1.84832e-05	9/26	0.0638947	0.622662	0.854561
V6	K01442	Choloylglycine hydrolase	Bile acid metabolism	0.233974	-0.0981151	0.519176	0.160501	0.545705	24	26	0.0330719	0.0324246	24/24	0.0362224	0.0351733	26/26	0.282362	0.0118383	0.079172

## Sheet: Supplementary Table S9 
Visit	Metabolite	Metabolite class	Treatment_Cliff's Delta	Treatment_Lower CI	Treatment_Upper CI	Treatment_P	Treatment_FDR	N Control	N Test	Median, Control	Mean, Control	Median, Test	Mean, Test	FCT_Tau	FCT_Kendall_P	FCT_Kendall_FDR
V3	2'-fucosyllactose	HMO	0.731092	0.416413	0.889347	5.06568e-05	0.00081051	17	21	0.661276	1.16397	3.6097	4.25875	-0.556683	1.09466e-05	0.000175146
V3	Lactose	HMO	0.563025	0.16525	0.803256	0.00258502	0.0170652	17	21	7.50673	7.69266	8.09749	8.37179	-0.185561	0.145109	0.178595
V3	4-Hydroxybenzoic acid	AA others	0.047619	-0.320265	0.403023	0.816493	0.861844	17	21	2.45213	2.45425	2.46242	2.52593	-0.192248	0.131041	0.174721
V3	2-Hydroxyphenylacetic acid	AA others	-0.490196	-0.746277	-0.107719	0.00946569	0.0216359	17	21	-0.919064	-0.780165	-2.09086	-1.79184	0.336016	0.00806963	0.0184449
V3	3-Hydroxyphenylacetic acid	FFA	-0.551821	-0.786883	-0.176915	0.00319972	0.0170652	17	21	-0.761335	-0.938442	-2.17327	-2.55946	0.429632	0.000696659	0.00222931
V3	Phenylacetic acid	AA others	-0.501401	-0.756632	-0.113568	0.00785511	0.0216359	17	21	5.7182	5.31788	4.30731	4.05965	0.429632	0.000696659	0.00222931
V3	Hydrocinnamic acid	AA others	-0.282913	-0.591085	0.0973306	0.143548	0.208797	17	21	1.74973	1.37661	0.203039	0.11894	0.202278	0.111951	0.162838
V3	4-Cresol sulfate	AA others	-0.411765	-0.695636	-0.0166726	0.0309251	0.0618503	17	21	2.32839	2.13172	1.07866	1.36981	0.178874	0.160305	0.183206
V3	L-Phenylalanine	AA others	0.170868	-0.206135	0.503701	0.382824	0.437513	17	21	5.54689	5.55368	5.82305	5.61288	0.138753	0.277413	0.295908
V3	Isobutyric acid	FFA	-0.495798	-0.746393	-0.122067	0.00862781	0.0216359	17	21	6.91665	6.67181	6.10013	5.43439	0.432975	0.000632286	0.00222931
V3	Isovaleric acid	FFA	-0.507003	-0.758846	-0.123255	0.00714335	0.0216359	17	21	6.59051	6.24722	5.32276	4.98192	0.453036	0.000348449	0.00222931
V3	Pimelic acid	FFA	-0.29972	-0.595287	0.06729	0.120617	0.192987	17	21	-2.38191	-2.50624	-2.93747	-3.04193	0.302581	0.017115	0.03423
V3	dehydrocholic acid	BA	0.0364146	-0.328931	0.392279	0.861844	0.861844	17	21	-1.24174	-1.27188	-1.28122	-1.18983	0.125379	0.326996	0.326996
V3	beta-ursodeoxycholic acid	BA	-0.40056	-0.677248	-0.0246146	0.0360288	0.0640512	17	21	2.24125	2.32474	-0.404739	0.580561	0.202278	0.111951	0.162838
V3	unconjugated/conjugated bile acids	#N/A	0.19888	-0.181473	0.527473	0.30806	0.37915	17	21	18.2118	35.1634	32.6674	75.2255	0.362763	0.00422204	0.0112588
V3	unconjugated/conjugated cholic acid	#N/A	0.260504	-0.120644	0.574714	0.178997	0.238663	17	21	15.0239	46.7513	71.2127	108.486	0.25243	0.0469383	0.0834459
V6	2'-fucosyllactose	HMO	0.515873	0.0963213	0.779768	0.0127591	0.0255182	18	14	2.56227	2.52751	3.47281	3.55598	-0.177936	0.215997	0.575991
V6	Lactose	HMO	0.174603	-0.235239	0.531727	0.419453	0.479375	18	14	8.89053	8.89044	9.03912	9.06942	-0.268158	0.0609938	0.243975
V6	4-Hydroxybenzoic acid	AA others	0.547619	0.159453	0.789131	0.00789059	0.0210416	18	14	3.37975	3.36706	4.30766	4.31572	-0.0576414	0.697389	0.915543
V6	2-Hydroxyphenylacetic acid	AA others	-0.444444	-0.721976	-0.0437233	0.0336354	0.0597963	18	14	0.387308	0.364519	-0.148744	-0.104683	-0.0526291	0.723715	0.915543
V6	3-Hydroxyphenylacetic acid	FFA	-0.373016	-0.660308	0.00951553	0.0771418	0.112206	18	14	-1.4576	-0.400562	-1.96498	-2.21182	0.117789	0.416192	0.832384
V6	Phenylacetic acid	AA others	-0.603175	-0.831837	-0.199464	0.00313386	0.0144008	18	14	6.23129	5.9165	5.12245	4.8452	-0.0526291	0.723715	0.915543
V6	Hydrocinnamic acid	AA others	-0.730159	-0.911008	-0.313764	0.000235761	0.00377217	18	14	3.02756	3.10822	1.45186	1.0807	-0.0225553	0.887555	0.915543
V6	4-Cresol sulfate	AA others	-0.309524	-0.642495	0.121766	0.145348	0.193797	18	14	2.77684	2.69835	1.93798	2.28841	-0.0375922	0.804561	0.915543
V6	L-Phenylalanine	AA others	-0.555556	-0.799827	-0.153411	0.0069614	0.0210416	18	14	6.63236	6.66642	5.88526	5.76585	-0.343342	0.0162262	0.165639
V6	Isobutyric acid	FFA	-0.642857	-0.853865	-0.250371	0.00150907	0.0120726	18	14	7.36255	7.27606	6.34065	6.20251	-0.017543	0.915543	0.915543
V6	Isovaleric acid	FFA	-0.595238	-0.825957	-0.193721	0.00360021	0.0144008	18	14	6.68047	6.55195	5.82746	5.41724	-0.0576414	0.697389	0.915543
V6	Pimelic acid	FFA	-0.515873	-0.780165	-0.0953177	0.0127591	0.0255182	18	14	-1.00445	-0.934549	-1.59942	-1.60716	0.313268	0.028402	0.165639
V6	dehydrocholic acid	BA	-0.0952381	-0.48314	0.323917	0.666557	0.666557	18	14	-3.17001	-3.20908	-3.35637	-3.3824	-0.308256	0.0310572	0.165639
V6	beta-ursodeoxycholic acid	BA	0.222222	-0.193095	0.570008	0.30077	0.370178	18	14	3.83035	3.37746	4.35625	3.97379	-0.132826	0.358046	0.81839
V6	unconjugated/conjugated bile acids	#N/A	0.134921	-0.280366	0.507663	0.536045	0.571781	18	14	42.1011	65.95	46.1342	58.9714	0.223047	0.119853	0.383529
V6	unconjugated/conjugated cholic acid	#N/A	0.412698	-0.0114689	0.710992	0.0494363	0.0790981	18	14	16.5929	38.9351	52.9226	72.7723	-0.017543	0.915543	0.915543
#N/A - Not Applicable

## Sheet: Supplementary Table S10
KO	Metabolite	Number infants	Number infants with non-zero values in both domains	Tau	P	FDR
K00263	2’fucosyllactose	70	7	-0.0170409	0.868117	0.934061
K00826	2’fucosyllactose	70	70	0.0815735	0.320392	0.547508
K00166	2’fucosyllactose	70	38	-0.0515617	0.557144	0.704852
K09699	2’fucosyllactose	70	34	0.00144492	0.991284	0.99557
K00815	2’fucosyllactose	70	32	-0.264589	0.0029297	0.044271
K00817	2’fucosyllactose	70	70	0.0128364	0.879116	0.934061
K00276	2’fucosyllactose	70	64	0.0274145	0.741666	0.865808
K00129	2’fucosyllactose	70	18	-0.0647466	0.491441	0.648894
K00146	2’fucosyllactose	70	64	-0.00332296	0.971681	0.986183
K00274	2’fucosyllactose	70	67	-0.000828672	0.995955	0.995955
K01593	2’fucosyllactose	70	61	-0.162291	0.0489121	0.219295
K18427	2’fucosyllactose	70	36	-0.235351	0.00733408	0.0919026
K18428	2’fucosyllactose	70	42	-0.206045	0.0167635	0.123191
K10797	2’fucosyllactose	70	70	-0.214907	0.00863738	0.0978903
K00457	2’fucosyllactose	70	70	-0.0741201	0.366845	0.570182
K01075	2’fucosyllactose	70	16	0.0467064	0.623687	0.76073
K01442	2’fucosyllactose	70	70	-0.138716	0.0904049	0.284707
K00263	Free lactose	70	7	0.0795243	0.417528	0.60257
K00826	Free lactose	70	70	0.0865424	0.291659	0.521916
K00166	Free lactose	70	38	-0.216931	0.0128781	0.115288
K09699	Free lactose	70	34	-0.171945	0.0518347	0.227404
K00815	Free lactose	70	32	-0.0206556	0.820312	0.917983
K00817	Free lactose	70	70	-0.0169772	0.839302	0.927235
K00276	Free lactose	70	64	0.0407063	0.622765	0.76073
K00129	Free lactose	70	18	0.141209	0.131466	0.361769
K00146	Free lactose	70	64	0.0431985	0.601416	0.740204
K00274	Free lactose	70	67	0.0787239	0.337957	0.557116
K01593	Free lactose	70	61	-0.200673	0.0148376	0.123191
K18427	Free lactose	70	36	-0.0170133	0.850232	0.929826
K18428	Free lactose	70	42	-0.105953	0.219673	0.429864
K10797	Free lactose	70	70	-0.176812	0.0307979	0.174521
K00457	Free lactose	70	70	0.0550725	0.503371	0.658255
K01075	Free lactose	70	16	0.0882232	0.350875	0.561401
K01442	Free lactose	70	70	0.0815735	0.320392	0.547508
K00263	4_Hydroxybenzoic acid	70	7	0.100352	0.305077	0.538837
K00826	4_Hydroxybenzoic acid	70	70	0.175983	0.031592	0.175368
K00166	4_Hydroxybenzoic acid	70	38	-0.146324	0.0937631	0.289813
K09699	4_Hydroxybenzoic acid	70	34	-0.125708	0.155566	0.377562
K00815	4_Hydroxybenzoic acid	70	32	-0.0639342	0.474813	0.642533
K00817	4_Hydroxybenzoic acid	70	70	0.0608696	0.459197	0.639579
K00276	4_Hydroxybenzoic acid	70	64	0.0697823	0.397028	0.596638
K00129	4_Hydroxybenzoic acid	70	18	0.0141826	0.884283	0.935117
K00146	4_Hydroxybenzoic acid	70	64	0.0132919	0.875074	0.934061
K00274	4_Hydroxybenzoic acid	70	67	0.180651	0.0274256	0.158719
K01593	4_Hydroxybenzoic acid	70	61	-0.068838	0.405178	0.60257
K18427	4_Hydroxybenzoic acid	70	36	0.061437	0.486462	0.647482
K18428	4_Hydroxybenzoic acid	70	42	-0.1303	0.130879	0.361769
K10797	4_Hydroxybenzoic acid	70	70	-0.165217	0.04362	0.208152
K00457	4_Hydroxybenzoic acid	70	70	0.121325	0.138783	0.366494
K01075	4_Hydroxybenzoic acid	70	16	0.118063	0.21102	0.42536
K01442	4_Hydroxybenzoic acid	70	70	0.156108	0.0566254	0.233365
K00263	Ortho_Hydroxyphenylacetic acid	70	7	0.24236	0.012747	0.115288
K00826	Ortho_Hydroxyphenylacetic acid	70	70	-0.0509317	0.536247	0.684785
K00166	Ortho_Hydroxyphenylacetic acid	70	38	-0.26617	0.00226669	0.0382412
K09699	Ortho_Hydroxyphenylacetic acid	70	34	-0.277906	0.00165427	0.0321402
K00815	Ortho_Hydroxyphenylacetic acid	70	32	0.0393441	0.661628	0.799835
K00817	Ortho_Hydroxyphenylacetic acid	70	70	-0.00538302	0.95149	0.976624
K00276	Ortho_Hydroxyphenylacetic acid	70	64	-0.137072	0.0952115	0.290984
K00129	Ortho_Hydroxyphenylacetic acid	70	18	-0.00431644	0.968338	0.986183
K00146	Ortho_Hydroxyphenylacetic acid	70	64	-0.148703	0.070214	0.25329
K00274	Ortho_Hydroxyphenylacetic acid	70	67	-0.0439196	0.594491	0.735007
K01593	Ortho_Hydroxyphenylacetic acid	70	61	-0.125577	0.127834	0.361769
K18427	Ortho_Hydroxyphenylacetic acid	70	36	0.108696	0.216667	0.427054
K18428	Ortho_Hydroxyphenylacetic acid	70	42	0.0852134	0.324077	0.547508
K10797	Ortho_Hydroxyphenylacetic acid	70	70	-0.10559	0.197853	0.417332
K00457	Ortho_Hydroxyphenylacetic acid	70	70	0.194203	0.0176634	0.123191
K01075	Ortho_Hydroxyphenylacetic acid	70	16	-0.0609778	0.520445	0.6741
K01442	Ortho_Hydroxyphenylacetic acid	70	70	0.161077	0.04918	0.219295
K00263	3_Hydroxyphenylacetic acid	70	7	0.0946718	0.333544	0.553194
K00826	3_Hydroxyphenylacetic acid	70	70	-0.0716356	0.383219	0.582321
K00166	3_Hydroxyphenylacetic acid	70	38	-0.0952265	0.276249	0.507702
K09699	3_Hydroxyphenylacetic acid	70	34	-0.128598	0.146247	0.370424
K00815	3_Hydroxyphenylacetic acid	70	32	0.0727866	0.415421	0.60257
K00817	3_Hydroxyphenylacetic acid	70	70	-0.0939959	0.251902	0.472533
K00276	3_Hydroxyphenylacetic acid	70	64	-0.16864	0.0399796	0.19782
K00129	3_Hydroxyphenylacetic acid	70	18	-0.0684464	0.46679	0.639579
K00146	3_Hydroxyphenylacetic acid	70	64	-0.142887	0.0819422	0.270024
K00274	3_Hydroxyphenylacetic acid	70	67	-0.0580071	0.480987	0.647482
K01593	3_Hydroxyphenylacetic acid	70	61	-0.0120988	0.886986	0.935117
K18427	3_Hydroxyphenylacetic acid	70	36	0.220228	0.0121195	0.115288
K18428	3_Hydroxyphenylacetic acid	70	42	0.310646	0.000307679	0.00836887
K10797	3_Hydroxyphenylacetic acid	70	70	0.0757764	0.356175	0.563254
K00457	3_Hydroxyphenylacetic acid	70	70	0.0128364	0.879116	0.934061
K01075	3_Hydroxyphenylacetic acid	70	16	0.0103792	0.917443	0.95246
K01442	3_Hydroxyphenylacetic acid	70	70	0.0293996	0.722682	0.854651
K00263	Phenylacetic acid	70	7	0.145794	0.135056	0.363716
K00826	Phenylacetic acid	70	70	-0.185093	0.0237551	0.150265
K00166	Phenylacetic acid	70	38	-0.108233	0.215633	0.427054
K09699	Phenylacetic acid	70	34	-0.181578	0.0400003	0.19782
K00815	Phenylacetic acid	70	32	0.0973766	0.275099	0.507702
K00817	Phenylacetic acid	70	70	-0.1147	0.161745	0.382563
K00276	Phenylacetic acid	70	64	-0.275806	0.000772659	0.0161664
K00129	Phenylacetic acid	70	18	-0.110377	0.238968	0.455611
K00146	Phenylacetic acid	70	64	-0.277468	0.000717786	0.0161664
K00274	Phenylacetic acid	70	67	-0.0679511	0.408581	0.60257
K01593	Phenylacetic acid	70	61	-0.0387996	0.640528	0.777784
K18427	Phenylacetic acid	70	36	0.317582	0.000294566	0.00836887
K18428	Phenylacetic acid	70	42	0.324171	0.00016582	0.0064433
K10797	Phenylacetic acid	70	70	0.0302277	0.7151	0.849376
K00457	Phenylacetic acid	70	70	0.063354	0.440951	0.618241
K01075	Phenylacetic acid	70	16	-0.118063	0.211019	0.42536
K01442	Phenylacetic acid	70	70	0.113043	0.167911	0.390387
K00263	Hydrocinnamic acid	70	7	0.0681637	0.487992	0.647482
K00826	Hydrocinnamic acid	70	70	-0.19089	0.0196984	0.132163
K00166	Hydrocinnamic acid	70	38	-0.138891	0.111727	0.326772
K09699	Hydrocinnamic acid	70	34	-0.077544	0.382154	0.582321
K00815	Hydrocinnamic acid	70	32	0.00688522	0.942585	0.971148
K00817	Hydrocinnamic acid	70	70	0.0136646	0.871125	0.934061
K00276	Hydrocinnamic acid	70	64	-0.105504	0.19946	0.417332
K00129	Hydrocinnamic acid	70	18	-0.132576	0.156855	0.377562
K00146	Hydrocinnamic acid	70	64	-0.105504	0.19946	0.417332
K00274	Hydrocinnamic acid	70	67	-0.207168	0.0114102	0.114947
K01593	Hydrocinnamic acid	70	61	-0.155616	0.0590063	0.236025
K18427	Hydrocinnamic acid	70	36	0.197544	0.0244688	0.151029
K18428	Hydrocinnamic acid	70	42	0.207848	0.015829	0.123191
K10797	Hydrocinnamic acid	70	70	-0.161077	0.04918	0.219295
K00457	Hydrocinnamic acid	70	70	0.0244306	0.768727	0.885991
K01075	Hydrocinnamic acid	70	16	-0.0622752	0.511515	0.665704
K01442	Hydrocinnamic acid	70	70	0.148654	0.0695335	0.25329
K00263	p_Cresol sulfate	70	7	0.157155	0.107034	0.316449
K00826	p_Cresol sulfate	70	70	-0.0517598	0.529586	0.681663
K00166	p_Cresol sulfate	70	38	-0.114736	0.189202	0.411703
K09699	p_Cresol sulfate	70	34	-0.128598	0.146247	0.370424
K00815	p_Cresol sulfate	70	32	0.185901	0.036743	0.188568
K00817	p_Cresol sulfate	70	70	-0.00124224	0.99191	0.99557
K00276	p_Cresol sulfate	70	64	-0.0938738	0.253833	0.472894
K00129	p_Cresol sulfate	70	18	-0.00554971	0.957792	0.979396
K00146	p_Cresol sulfate	70	64	-0.107166	0.192446	0.414658
K00274	p_Cresol sulfate	70	67	0.00911539	0.915211	0.95246
K01593	p_Cresol sulfate	70	61	-0.14894	0.0707723	0.25329
K18427	p_Cresol sulfate	70	36	0.298678	0.000663519	0.0161664
K18428	p_Cresol sulfate	70	42	0.330484	0.000123262	0.0064433
K10797	p_Cresol sulfate	70	70	-0.0318841	0.70002	0.83879
K00457	p_Cresol sulfate	70	70	0.12381	0.13085	0.361769
K01075	p_Cresol sulfate	70	16	-0.162175	0.085311	0.273119
K01442	p_Cresol sulfate	70	70	0.166874	0.0415497	0.201813
K00263	L_Phenylalanine	70	7	0.174196	0.0738589	0.257559
K00826	L_Phenylalanine	70	70	-0.161905	0.0480228	0.219295
K00166	L_Phenylalanine	70	38	-0.270815	0.00189486	0.0343601
K09699	L_Phenylalanine	70	34	-0.268273	0.00239007	0.0382412
K00815	L_Phenylalanine	70	32	0.0836062	0.349133	0.561401
K00817	L_Phenylalanine	70	70	0.0227743	0.784268	0.900088
K00276	L_Phenylalanine	70	64	-0.173625	0.0344455	0.183709
K00129	L_Phenylalanine	70	18	-0.057347	0.542769	0.689875
K00146	L_Phenylalanine	70	64	-0.189409	0.021025	0.136162
K00274	L_Phenylalanine	70	67	-0.117671	0.15135	0.374246
K01593	L_Phenylalanine	70	61	-0.238221	0.00381426	0.0546042
K18427	L_Phenylalanine	70	36	0.155955	0.0759089	0.261357
K18428	L_Phenylalanine	70	42	-0.00856642	0.924779	0.956426
K10797	L_Phenylalanine	70	70	-0.118841	0.14708	0.370424
K00457	L_Phenylalanine	70	70	-0.102277	0.212348	0.42536
K01075	L_Phenylalanine	70	16	-0.125848	0.182305	0.403146
K01442	L_Phenylalanine	70	70	0.0666667	0.417282	0.60257
K00263	Isobutyric acid	70	7	0.0965652	0.32387	0.547508
K00826	Isobutyric acid	70	70	-0.15528	0.0579531	0.235272
K00166	Isobutyric acid	70	38	-0.0905813	0.300477	0.534181
K09699	Isobutyric acid	70	34	-0.153643	0.082397	0.270024
K00815	Isobutyric acid	70	32	0.0944258	0.289985	0.521916
K00817	Isobutyric acid	70	70	-0.121325	0.138782	0.366494
K00276	Isobutyric acid	70	64	-0.210178	0.0104338	0.109154
K00129	Isobutyric acid	70	18	-0.169574	0.0698839	0.25329
K00146	Isobutyric acid	70	64	-0.203532	0.0131395	0.115288
K00274	Isobutyric acid	70	67	-0.107727	0.189148	0.411703
K01593	Isobutyric acid	70	61	0.0196084	0.815388	0.91647
K18427	Isobutyric acid	70	36	0.330815	0.000162601	0.0064433
K18428	Isobutyric acid	70	42	0.316056	0.000240922	0.00819135
K10797	Isobutyric acid	70	70	0.0666667	0.417282	0.60257
K00457	Isobutyric acid	70	70	0.0650104	0.429022	0.604632
K01075	Isobutyric acid	70	16	-0.0752492	0.426796	0.604628
K01442	Isobutyric acid	70	70	0.104762	0.201407	0.418188
K00263	Isovaleric acid	70	7	0.0681637	0.487992	0.647482
K00826	Isovaleric acid	70	70	-0.157764	0.0540457	0.228829
K00166	Isovaleric acid	70	38	-0.0636392	0.467927	0.639579
K09699	Isovaleric acid	70	34	-0.119928	0.175546	0.401247
K00815	Isovaleric acid	70	32	0.126885	0.154505	0.377562
K00817	Isovaleric acid	70	70	-0.151967	0.0635256	0.243366
K00276	Isovaleric acid	70	64	-0.197716	0.0159978	0.123191
K00129	Isovaleric acid	70	18	-0.139976	0.134884	0.363716
K00146	Isovaleric acid	70	64	-0.197716	0.0159978	0.123191
K00274	Isovaleric acid	70	67	-0.0662938	0.420177	0.60257
K01593	Isovaleric acid	70	61	0.0746788	0.366277	0.570182
K18427	Isovaleric acid	70	36	0.38658	1.04904e-05	0.00285339
K18428	Isovaleric acid	70	42	0.332287	0.00011313	0.0064433
K10797	Isovaleric acid	70	70	0.125466	0.12576	0.361769
K00457	Isovaleric acid	70	70	0.0459627	0.577075	0.716732
K01075	Isovaleric acid	70	16	-0.0934128	0.323067	0.547508
K01442	Isovaleric acid	70	70	0.0674948	0.411484	0.60257
K00263	Pimelic acid	70	7	0.0719505	0.463817	0.639579
K00826	Pimelic acid	70	70	-0.00289855	0.975734	0.986616
K00166	Pimelic acid	70	38	-0.195563	0.0249864	0.151029
K09699	Pimelic acid	70	34	-0.244191	0.00571295	0.0776961
K00815	Pimelic acid	70	32	0.160327	0.0717779	0.253553
K00817	Pimelic acid	70	70	-0.099793	0.223711	0.434639
K00276	Pimelic acid	70	64	-0.153687	0.0612917	0.239984
K00129	Pimelic acid	70	18	0.0548804	0.560453	0.705755
K00146	Pimelic acid	70	64	-0.158672	0.0533295	0.228829
K00274	Pimelic acid	70	67	0.0778952	0.343093	0.559406
K01593	Pimelic acid	70	61	-0.133087	0.106514	0.316449
K18427	Pimelic acid	70	36	0.230625	0.00860572	0.0978903
K18428	Pimelic acid	70	42	-0.0175837	0.842012	0.927235
K10797	Pimelic acid	70	70	-0.110559	0.177488	0.401877
K00457	Pimelic acid	70	70	0.118012	0.149929	0.374134
K01075	Pimelic acid	70	16	0.0402194	0.673369	0.810426
K01442	Pimelic acid	70	70	0.219048	0.0074333	0.0919026
K00263	dehydrocholic acid	70	7	-0.164729	0.0910643	0.284707
K00826	dehydrocholic acid	70	70	-0.0964803	0.239531	0.455611
K00166	dehydrocholic acid	70	38	0.163046	0.0617605	0.239984
K09699	dehydrocholic acid	70	34	0.210477	0.0172436	0.123191
K00815	dehydrocholic acid	70	32	-0.0845898	0.343459	0.559406
K00817	dehydrocholic acid	70	70	-0.0658385	0.423128	0.60257
K00276	dehydrocholic acid	70	64	0.0107996	0.899108	0.944237
K00129	dehydrocholic acid	70	18	-0.0289818	0.760887	0.880687
K00146	dehydrocholic acid	70	64	0.0290759	0.726388	0.855314
K00274	dehydrocholic acid	70	67	-0.0157448	0.851201	0.929826
K01593	dehydrocholic acid	70	61	0.335012	4.68493e-05	0.00424767
K18427	dehydrocholic acid	70	36	-0.0784503	0.373378	0.577039
K18428	dehydrocholic acid	70	42	0.121283	0.159802	0.381282
K10797	dehydrocholic acid	70	70	0.347412	2.15769e-05	0.00293446
K00457	dehydrocholic acid	70	70	-0.171014	0.0367348	0.188568
K01075	dehydrocholic acid	70	16	-0.0817362	0.387704	0.585863
K01442	dehydrocholic acid	70	70	-0.194203	0.0176634	0.123191
K00263	3β_Ursodeoxycholic Acid	70	7	0.208278	0.0324256	0.176395
K00826	3β_Ursodeoxycholic Acid	70	70	-0.0757764	0.356175	0.563254
K00166	3β_Ursodeoxycholic Acid	70	38	-0.120311	0.168515	0.390387
K09699	3β_Ursodeoxycholic Acid	70	34	-0.133414	0.131673	0.361769
K00815	3β_Ursodeoxycholic Acid	70	32	-0.0157376	0.86364	0.934061
K00817	3β_Ursodeoxycholic Acid	70	70	0.0592133	0.471592	0.641365
K00276	3β_Ursodeoxycholic Acid	70	64	-0.19107	0.0199216	0.132163
K00129	3β_Ursodeoxycholic Acid	70	18	-0.0918785	0.327529	0.549926
K00146	3β_Ursodeoxycholic Acid	70	64	-0.2135	0.00927678	0.100931
K00274	3β_Ursodeoxycholic Acid	70	67	0.0182308	0.827425	0.91861
K01593	3β_Ursodeoxycholic Acid	70	61	0.110558	0.180254	0.401877
K18427	3β_Ursodeoxycholic Acid	70	36	0.159736	0.0690501	0.25329
K18428	3β_Ursodeoxycholic Acid	70	42	0.118577	0.169359	0.390387
K10797	3β_Ursodeoxycholic Acid	70	70	0.0832298	0.310615	0.54508
K00457	3β_Ursodeoxycholic Acid	70	70	0.0799172	0.330367	0.551288
K01075	3β_Ursodeoxycholic Acid	70	16	-0.0168662	0.862842	0.934061
K01442	3β_Ursodeoxycholic Acid	70	70	0.144513	0.0776914	0.264151
K00263	Uncon_conjuBA_main	70	7	-0.0246147	0.807082	0.914693
K00826	Uncon_conjuBA_main	70	70	-0.120497	0.141507	0.370096
K00166	Uncon_conjuBA_main	70	38	-0.167692	0.0546835	0.228829
K09699	Uncon_conjuBA_main	70	34	-0.115112	0.193609	0.414658
K00815	Uncon_conjuBA_main	70	32	0.0560653	0.531296	0.681663
K00817	Uncon_conjuBA_main	70	70	-0.0186335	0.823485	0.917983
K00276	Uncon_conjuBA_main	70	64	-0.0772589	0.348127	0.561401
K00129	Uncon_conjuBA_main	70	18	-0.107911	0.249688	0.471633
K00146	Uncon_conjuBA_main	70	64	-0.0822434	0.317753	0.547508
K00274	Uncon_conjuBA_main	70	67	0.0314895	0.703766	0.83958
K01593	Uncon_conjuBA_main	70	61	-0.0871948	0.291088	0.521916
K18427	Uncon_conjuBA_main	70	36	-0.05104	0.563765	0.706655
K18428	Uncon_conjuBA_main	70	42	-0.148334	0.0853496	0.273119
K10797	Uncon_conjuBA_main	70	70	-0.118841	0.14708	0.370424
K00457	Uncon_conjuBA_main	70	70	-0.00952381	0.911194	0.95246
K01075	Uncon_conjuBA_main	70	16	0.112874	0.231898	0.447349
K01442	Uncon_conjuBA_main	70	70	0.182609	0.0257044	0.151991
K00263	Uncon_conjuCA	70	7	-0.106032	0.27827	0.507983
K00826	Uncon_conjuCA	70	70	-0.0658385	0.423128	0.60257
K00166	Uncon_conjuCA	70	38	0.0766457	0.381413	0.582321
K09699	Uncon_conjuCA	70	34	0.118965	0.179054	0.401877
K00815	Uncon_conjuCA	70	32	-0.081639	0.360658	0.567046
K00817	Uncon_conjuCA	70	70	0.132091	0.106929	0.316449
K00276	Uncon_conjuCA	70	64	-0.0606441	0.462115	0.639579
K00129	Uncon_conjuCA	70	18	-0.0302151	0.750829	0.872758
K00146	Uncon_conjuCA	70	64	-0.0556597	0.499987	0.656988
K00274	Uncon_conjuCA	70	67	-0.0215455	0.795971	0.908408
K01593	Uncon_conjuCA	70	61	0.0196084	0.815388	0.91647
K18427	Uncon_conjuCA	70	36	-0.109641	0.21268	0.42536
K18428	Uncon_conjuCA	70	42	-0.150138	0.081607	0.270024
K10797	Uncon_conjuCA	70	70	-0.0277433	0.737929	0.865158
K00457	Uncon_conjuCA	70	70	-0.0459627	0.577075	0.716732
K01075	Uncon_conjuCA	70	16	-0.0246506	0.798197	0.908408
K01442	Uncon_conjuCA	70	70	0.103106	0.208654	0.42536
